# Supplementary material
Source: Elsevier journal article supplement (https://www.sciencedirect.com/science/article/pii/S0001731020302490)
Supplement: mmc1 [file S0001731020302490:mmc1.pdf]

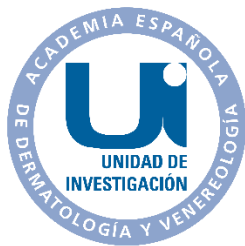

Fundación  
Piel Sana

2020

# Guía de práctica clínica de melanoma de la Academia Española de Dermatología y Venereología

## **Autores:**

### **Coordinador:**

[Rafael Botella Estrada](#)

Hospital Universitario la Fe, Valencia.

### **Panelistas:**

[Aram Boada García](#)

Hospital Universitario Germans Trias i Pujol, Badalona.

[Cristina Carrera Álvarez](#)

Hospital Clínic, Barcelona.

[David Moreno Ramírez](#)

Hospital Universitario Virgen Macarena, Sevilla.

[Elia Samaniego González](#)

Complejo Asistencial Universitario de León, León.

[Antonio Tejera Vaquerizo](#)

Instituto Dermatológico GlobalDerm, Palma del Rio, Cordoba

[Francisco Vílchez-Márquez](#)

Servicio de Dermatología. Hospital Universitario Virgen de las Nieves. Granada.

### **Coordinación metodológica:**

[Miguel Ángel Descalzo-Gallego](#)

Unidad de Investigación. Fundación Piel Sana Academia Española de Dermatología y Venereología. Madrid.

[Ignacio García-Doval](#)

Unidad de Investigación. Fundación Piel Sana Academia Española de Dermatología y Venereología. Madrid.

Servicio de Dermatología. Complejo Hospitalario Universitario de Vigo. Vigo.

## **Coordinación del Libro Blanco de la AEDV**

Luis Ríos-Buceta

Servicio de Dermatología. Hospital Universitario Ramón y Cajal. Madrid.

## **Revisores:**

María González Cao

Translational Cancer Research Unit, Instituto Oncologico Dr Rosell, Hospital Universitario Dexeus, Barcelona.

Maite Fernández Figueras

Área de Anatomía Patológica. Hospital Universitario General de Cataluña-Quirón Salud. Barcelona.

Eduardo Nagore

Servicio de Dermatología. Instituto Valenciano de Oncología. Valencia.

José Luis Rodríguez Peralto

Servicio de Anatomía Patológica. Hospital Universitario 12 de Octubre. Madrid

La guía se ha remitido para que puedan aportar comentarios a: Asociación Española Contra el Cáncer, Merck, Bristol-Myers Squibb, Novartis y Roche Pharma.

## **Agradecimientos:**

Ángeles Flórez Menéndez, Antonio Martínez López, Carmen Peña Penabad, Celia Posada García han enviado comentarios con aportaciones para la GPC.

## **Autoría:**

Gestión del Proyecto y búsquedas de información: RBE,MADG,IGD.

Alcance y objetivos: RBE,ABG,CCA,DMR,ESG,ATV,FVM,MADG,IGD,LRB.

Formulación de las preguntas clínicas: RBE,ABG,CCA,DMR,ESG,ATV,FVM,MADG,IGD.

Búsqueda y cribado de las GPC: RBE,ABG,CCA,DMR,ESG,ATV,FVM,MADG,IGD.

Evaluación de las GPC, borrador y formulación de recomendaciones:  
RBE,ABG,CCA,DMR,ESG,ATV,FVM.

Revisión de la GPC: RBE,ABG,CCA,DMR,ESG,ATV,FVM,MADG,IGD,LRB,MGC,MFF,ENE,JLRP.

Aprobación final de la GPC: RBE,ABG,CCA,DMR,ESG,ATV,FVM,MADG,IGD,LRB,ENE.

Responsabilidad final sobre el método, y contenido:  
RBE,ABG,CCA,DMR,ESG,ATV,FVM,MADG,IGD.

### Fecha de publicación:

10 de febrero de 2020

## Tabla de contenido

|                                                                                                                                                                                                                                                                                                                                                                 |    |
|-----------------------------------------------------------------------------------------------------------------------------------------------------------------------------------------------------------------------------------------------------------------------------------------------------------------------------------------------------------------|----|
| Autores:.....                                                                                                                                                                                                                                                                                                                                                   | 2  |
| Introducción .....                                                                                                                                                                                                                                                                                                                                              | 8  |
| Material y Métodos.....                                                                                                                                                                                                                                                                                                                                         | 9  |
| Resultados.....                                                                                                                                                                                                                                                                                                                                                 | 11 |
| BLOQUE 1. Diagnóstico molecular. ....                                                                                                                                                                                                                                                                                                                           | 12 |
| Pregunta 1. ¿Las nuevas técnicas de biología molecular (como la hibridación in situ por fluorescencia (FISH) o la hibridación genómica comparada (CGH) mejoran la fiabilidad diagnóstica de melanoma en pacientes con proliferaciones melanocíticas atípicas / spitzoides / borderline o de significado biológico incierto? .....                               | 13 |
| Pregunta 2. ¿Los perfiles de expresión genética permiten una mejor clasificación en grupos de riesgo de progresión a los pacientes con melanoma en estadio I-II de la AJCC 2017? ¿Sus resultados pueden modificar la actitud terapéutica?.....                                                                                                                  | 16 |
| BLOQUE 2. Biopsia y tratamiento quirúrgico del tumor primario. ....                                                                                                                                                                                                                                                                                             | 19 |
| Pregunta 3. Ante un paciente con una lesión pigmentada en la zona facial o acral, donde la exéresis completa puede conllevar alteraciones estéticas o funcionales, la biopsia escisional comparada con la incisional (huso, biopsia en sacabocados) y comparada con la biopsia por afeitado, ¿ofrece un diagnóstico correcto en un porcentaje mayor de casos?20 |    |
| Pregunta 4. Ante un paciente con sospecha de melanoma, la biopsia incisional/parcial comparada con la biopsia escisional, ¿empeora la supervivencia?.....                                                                                                                                                                                                       | 22 |
| Pregunta 5. En pacientes a los que se les ha diagnosticado histológicamente un melanoma in situ (estadio 0), la extirpación de un margen de 10 mm frente a otro de 5 mm, ¿disminuye el porcentaje de recurrencias locales? .....                                                                                                                                | 24 |
| BLOQUE 3. Tratamiento del lentigo maligno. ....                                                                                                                                                                                                                                                                                                                 | 26 |
| Pregunta 6. En pacientes a los que se les ha diagnosticado histológicamente un lentigo maligno, la extirpación de un margen de 10 mm frente a un margen de 5 mm frente a la realización de cirugía con control de márgenes al microscopio ¿consigue una menor tasa de recidivas locales?.....                                                                   | 27 |
| Pregunta 7. En pacientes a los que se les ha diagnosticado histológicamente un lentigo maligno y en los que la cirugía no es una opción adecuada, el tratamiento con radioterapia frente al tratamiento con imiquimod frente al tratamiento con crioterapia frente a la observación ¿qué resultados ofrecen en cuanto a supervivencia?.....                     | 30 |
| BLOQUE 4. Pruebas de estadificación y seguimiento .....                                                                                                                                                                                                                                                                                                         | 34 |
| Pregunta 8. En pacientes a los que se les ha diagnosticado un melanoma, la realización de pruebas de imagen y/o de laboratorio frente a la exploración clínica y anamnesis, ¿se traduce en un aumento de la supervivencia global? .....                                                                                                                         | 35 |

|                                                                                                                                                                                                                                                                                                                                                                     |    |
|---------------------------------------------------------------------------------------------------------------------------------------------------------------------------------------------------------------------------------------------------------------------------------------------------------------------------------------------------------------------|----|
| Pregunta 9. En pacientes diagnosticados y tratados por un melanoma, que se encuentran en seguimiento, la realización de pruebas de imagen y/o de laboratorio frente a la autoexploración y la exploración clínica durante las visitas de seguimiento, ¿se traduce en un aumento de la supervivencia global?.....                                                    | 39 |
| Pregunta 10. En pacientes a los que se les extirpó un melanoma hace 5 ó más años y que posteriormente no han desarrollado metástasis, el seguimiento por parte del dermatólogo frente al seguimiento por el médico de atención primaria frente a la autoexploración, ¿mejora la detección precoz de un segundo melanoma o la detección de recidivas?.....           | 42 |
| BLOQUE 5. Ganglio centinela y linfadenectomía .....                                                                                                                                                                                                                                                                                                                 | 46 |
| Pregunta 11. En pacientes con un melanoma con un espesor de Breslow <0.8 mm, la realización de la biopsia del ganglio centinela (BSGC) frente a la observación ¿mejora la supervivencia global? .....                                                                                                                                                               | 47 |
| Pregunta 12. En pacientes con ganglio centinela positivo, la realización de una linfadenectomía del área de drenaje linfático frente al seguimiento del paciente con ecografías periódicas ¿mejora la supervivencia global? .....                                                                                                                                   | 49 |
| Pregunta 13. En pacientes con afectación metastásica ganglionar, la información patológica sobre el número de ganglios afectos, tamaño del depósito metastásico y localización de la metástasis en el ganglio ¿ofrece información pronóstica relevante y debería recogerse en el informe histológico?.....                                                          | 52 |
| Pregunta 14. En pacientes con enfermedad cutánea regional (satelitosis, metástasis en tránsito) en el momento del diagnóstico o durante el seguimiento, la realización de la biopsia del ganglio centinela frente a observación, ¿mejora la supervivencia global? .....                                                                                             | 54 |
| BLOQUE 6. Tratamiento adyuvante. ....                                                                                                                                                                                                                                                                                                                               | 56 |
| Pregunta 15. En pacientes con melanoma de alto riesgo (estadios IIB, IIC ó III/IV tras exéresis de metástasis y ausencia de enfermedad objetivable), la administración de tratamiento adyuvante con interferón a dosis altas, ¿mejora la supervivencia global? ....                                                                                                 | 57 |
| Pregunta 16. En pacientes con melanomas de alto riesgo (estadios IIB, IIC ó III/IV tras exéresis de metástasis y ausencia de enfermedad objetivable), el tratamiento adyuvante con inhibidores de los puntos de control inmunitarios (IPI) (anti-CTLA4, anti-PD1) frente a la observación, ¿mejora la supervivencia global?.....                                    | 59 |
| Pregunta 17. En pacientes con melanomas de alto riesgo (estadios IIB, IIC o III/IV tras exéresis de metástasis y ausencia de enfermedad objetivable), el tratamiento adyuvante con terapias dirigidas anti-BRAF frente a la observación, ¿mejora la supervivencia global? .....                                                                                     | 62 |
| Pregunta 18. En pacientes a los que se les ha realizado una linfadenectomía terapéutica y tienen un alto riesgo de recidiva local (invasión extracapsular, o $\geq 2$ -4 ganglios según área o $\geq 3$ -4 cm de diámetro mayor ganglionar según área), la administración de radioterapia adyuvante frente a la observación, ¿mejora la supervivencia global? ..... | 64 |

|                                                                                                                                                                                                                                                                                                                                                                                                         |     |
|---------------------------------------------------------------------------------------------------------------------------------------------------------------------------------------------------------------------------------------------------------------------------------------------------------------------------------------------------------------------------------------------------------|-----|
| BLOQUE 7. Tratamiento de la enfermedad locorregional y tratamiento quirúrgico de la enfermedad diseminada regional y/o a distancia.....                                                                                                                                                                                                                                                                 | 67  |
| Pregunta 19. En pacientes con enfermedad diseminada regional (satelitosis, metástasis en tránsito) el tratamiento con cirugía, perfusión aislada de miembro, electroquimioterapia, radioterapia, IL2 intralesional, imiquimod, terapia de virus oncolíticos, rosa bengala o tratamiento sistémico frente a observación, ¿mejora la supervivencia global? ¿mejora la calidad de vida del paciente? ..... | 68  |
| Pregunta 20. En pacientes con melanomas en estadios III o IV, la extirpación de las metástasis ¿Mejora la supervivencia global? ¿Mejora la calidad de vida del paciente? ....                                                                                                                                                                                                                           | 70  |
| BLOQUE 8. Tratamiento médico de la enfermedad metastásica. ....                                                                                                                                                                                                                                                                                                                                         | 72  |
| Pregunta 21. En melanomas en estadios III y IV no quirúrgicos, los tratamientos con fármacos IPI (anti-CTLA4, anti-PD1) y las terapias dirigidas anti-BRAF, ¿mejoran la supervivencia global? .....                                                                                                                                                                                                     | 73  |
| Discusión .....                                                                                                                                                                                                                                                                                                                                                                                         | 82  |
| Financiación: .....                                                                                                                                                                                                                                                                                                                                                                                     | 83  |
| Agradecimientos: .....                                                                                                                                                                                                                                                                                                                                                                                  | 83  |
| Bibliografía .....                                                                                                                                                                                                                                                                                                                                                                                      | 84  |
| MATERIAL SUPLEMENTARIO .....                                                                                                                                                                                                                                                                                                                                                                            | 98  |
| Apartado 1.- Resumen de los pasos para adaptar GPC.....                                                                                                                                                                                                                                                                                                                                                 | 98  |
| Apartado 2.- Alcance y Objetivo de la Guía .....                                                                                                                                                                                                                                                                                                                                                        | 100 |
| Apartado 3.- Estrategia de búsqueda y selección de las guías fuente.....                                                                                                                                                                                                                                                                                                                                | 103 |
| Apartado 4.- Conflictos de interés .....                                                                                                                                                                                                                                                                                                                                                                | 106 |

## Introducción

Los tumores cutáneos son muy frecuentes en nuestro medio y suponen un importante problema de salud pública. La tasa de incidencia global cruda del melanoma en España es de 8,82 (IC 95%: 7,59-10,04) /100.000 personas-año y es probable que esté aumentando<sup>1</sup>. El melanoma, por su incidencia y pronóstico, es el tumor cutáneo que ocasiona una mayor mortalidad: 2,17 casos por 100.000 personas-año<sup>1</sup>. El diagnóstico y tratamiento del melanoma suponen una importante carga de trabajo para los dermatólogos y el sistema de salud<sup>2</sup>.

Existen numerosas alternativas terapéuticas para el melanoma, algunas de ellas nuevas, con variabilidad en la práctica clínica, con efectividad y riesgo de acontecimientos adversos variables y con grandes diferencias de coste según el tratamiento aplicado. Estos factores hacen más compleja la toma de decisiones clínicas.

Existen guías de práctica clínica para el cuidado del melanoma, pero en contextos diferentes y con una cobertura parcial de los problemas que los dermatólogos han identificado como principales.

Por ello, la Fundación Piel Sana de la Academia Española de Dermatología y Venereología (AEDV), ha impulsado la adaptación de Guías de Práctica Clínica (GPC) sobre los principales tumores cutáneos, formando parte del proyecto *Libro Blanco del Cáncer Cutáneo*.

El objetivo de esta guía es adaptar a nuestro medio un conjunto de recomendaciones, basadas en la mejor evidencia posible, que ayuden en la toma de decisiones en el manejo de los pacientes con melanoma.

## Material y Métodos

Al existir guías de práctica clínica (GPC) previas, se optó por adaptarlas, empleando el método ADAPTE<sup>3</sup>. El resumen de los pasos empleados está disponible como material suplementario (material suplementario-apartado 1).

Los paneles se seleccionaron atendiendo a su experiencia en el tratamiento de estos tumores e interés en participar en la GPC, entre los miembros del Grupo Español de Dermato-Oncología y Cirugía de la AEDV (GEDOC). Todos los panelistas declararon sus conflictos de interés antes de iniciar su participación y los resultados se incluyen en el apartado de conflicto de interés.

En el documento de alcance y objetivos se estableció como objetivo de la guía el aportar indicaciones sobre aspectos controvertidos del diagnóstico, los tratamientos médicos y quirúrgicos y el seguimiento de estos pacientes (material suplementario-apartado 2). El ámbito asistencial de la GPC es la asistencia dermatológica en España, siendo los usuarios diana los dermatólogos. Se excluyeron del ámbito de la GPC la prevención del carcinoma basocelular y los pacientes con síndromes de tumores múltiples.

En los pasos siguientes, y siguiendo el método ADAPTE, se resumió el proceso de atención y se formularon preguntas clínicas relevantes para cada uno de los pasos del algoritmo (material suplementario-apartado 3). Las preguntas más relevantes se seleccionaron mediante consenso en una reunión presencial en la sede de la AEDV en octubre de 2016. Paralelamente las guías fueron buscadas en páginas web o en fuentes u organizaciones específicas como aquellas que se dedican a recopilarlas, elaborarlas o difundirlas, además de las principales academias de dermatología o cáncer (como por ejemplo National Guidelines Clearinghouse, Guidelines International Network, Guíasalud, Institute for Clinical Systems Improvement, NICE, New Zealand Guidelines Group, Scottish Guidelines Network, Cochrane library, British Academy of Dermatology, American Academy of Dermatology, European Academy of Dermatology, NCCN). Se adjunta como material suplementario (apartado 4) la estrategia de búsqueda y la fecha (última revisión: septiembre 2019). Las guías fueron posteriormente revisadas y evaluadas por su calidad metodológica empleando el instrumento AGREE II<sup>4</sup>. Se seleccionaron para su consulta las GPC con mejores resultados.

Las preguntas que hacen referencia a un estadio se basan en la clasificación AJCC, 7ª edición, pues es la empleada en los artículos fuente.

A partir de esta información se generaron las recomendaciones. En ellas se mantuvo la referencia a la fuente original. Las extracciones, el nivel de evidencia y grado de fuerza de la recomendación empleando los niveles del Centro de Medicina Basada en la Evidencia de Oxford, se realizaron siempre por pares<sup>5</sup>.

Una vez finalizado el borrador de las recomendaciones se publicaron en la web de la AEDV y se sometieron a revisión externa: siendo solicitada la revisión de todos los miembros de la AEDV, miembros del GEDOC, oncólogos, asociaciones de pacientes e industria farmacéutica con interés en el tema. Las objeciones de los revisores fueron consideradas por los panelistas y, si se consideraron adecuadas, aplicadas a la GPC.

## Resultados

Las guías con calidad más alta según las puntuaciones y cuyos objetivos estaban alineados con el alcance y objetivos planteados se describen en el material suplementario (apartado 3).

En las siguientes secciones se describen las preguntas clínicas planteadas y las recomendaciones de la GPC.

## BLOQUE 1. Diagnóstico molecular.

Pregunta 1. ¿Las nuevas técnicas de biología molecular (como la hibridación in situ por fluorescencia (FISH) o la hibridación genómica comparada (CGH) mejoran la fiabilidad diagnóstica de melanoma en pacientes con proliferaciones melanocíticas atípicas / spitzoides / borderline o de significado biológico incierto?

### Resumen de la evidencia

En algunas neoplasias pigmentarias el diagnóstico de certeza es muy difícil o imposible. Las guías clínicas de la AAD y de la NCCN americanas<sup>6,7</sup>, consideran que a fecha actual las técnicas diagnósticas citogenéticas se deben considerar un recurso complementario en investigación, nunca de forma rutinaria en diagnóstico de melanoma, porque los resultados de estas técnicas se asocian con el pronóstico, pero no se ha demostrado adecuadamente su utilidad diagnóstica.

Nivel de evidencia: 4.

### Recomendaciones

Sugerimos que en situaciones de alta incertidumbre (tumores “borderline” o de comportamiento incierto), las técnicas citogenéticas pueden ser de ayuda. Sin embargo, su valor diagnóstico se considera incierto. Sugerimos que deben usarse de forma individualizada, juntamente con la evaluación clínico-patológica y preferiblemente su interpretación debe ser consensuada entre expertos.

Fuerza de la recomendación: C

### Calidad de la evidencia

Se entiende que, en el espectro de tumores melanocíticos, existiría un modelo de adquisición progresiva de alteraciones moleculares en las lesiones malignas, y por tanto la demostración de más aberraciones citogenéticas en tumores intermedios/borderline o de significado incierto favorecería un comportamiento biológico de mayor agresividad<sup>8,9</sup>. Por ello se acepta que los métodos que permiten identificar alteraciones genéticas pueden ayudar a apoyar un diagnóstico de malignidad. En concreto; técnicas citogenéticas; como la hibridación genómica comparada o la hibridación in situ, o los perfiles de expresión génica tumoral pueden ser de

ayuda complementando la información morfológica y clínica, pero hay consenso en que no sustituyen el criterio histopatológico clásico.

Los melanomas muestran habitualmente múltiples aberraciones cromosómicas detectables por CGH (principalmente afectando los cromosomas 6, 7, 9, y 10)<sup>8,10</sup>. Se han descrito ciertas alteraciones genéticas en un modelo de adquisición progresiva desde lesiones con atipia consideradas en una categoría “intermedia” hacia las malignas localizadas y por último las lesiones con potencial metastásico. Así, por ejemplo, pérdidas en cromosomas 9 y 10 son eventos más precoces en melanoma, mientras que ganancias del cromosoma 7 sería un evento más tardío<sup>9</sup>.

El uso de técnicas citogenéticas (como FISH/CGH) en el diagnóstico de tumores melanocíticos puede ser de ayuda como complemento de la información clínico-patológica. Dado que los melanomas suelen expresar múltiples aberraciones genéticas diferentes estudios demuestran que mediante una medición cuantitativa de pérdidas y ganancias detectadas mediante las 4 sondas comercializadas del FISH se alcanza una sensibilidad y especificidad diagnóstica para melanoma del 87% y 96% respectivamente<sup>11</sup>. Se considera un FISH positivo cuando uno de los siguientes criterios se cumple: (1)  $\geq 55\%$  núcleos con ganancias de 6p25 respecto CEP6; (2)  $\geq 40\%$  núcleos con pérdidas de 6q; (3)  $\geq 29\%$  núcleos con ganancias de 6p25; o (4)  $\geq 38\%$  núcleos con ganancias de 11q13).

En el caso concreto de tumores spitzoides se sabe que los nevus de Spitz pueden mostrar característicamente ganancias de *HRAS* (11p21) o pérdidas aisladas de parte o todo el cromosoma 3. Contrariamente, los tumores spitzoides de mayor riesgo de comportamiento maligno serían aquellos que muestren pérdidas homocigotas de 9p21, similares a los melanomas convencionales. Existirían casos de riesgo intermedio; aquellos que muestren ganancias de 6p25 o de 11q13, y casos de bajo riesgo de metastatizar cuando el FISH sea negativo o exista únicamente pérdida de 6q<sup>12</sup>. Sin embargo, se carece de estudios suficientes que validen de forma robusta su valor en los casos considerados ambiguos o histopatológicamente de “comportamiento incierto”.

Adicionalmente, las amplificaciones de *TERT* y las mutaciones en su promotor, además de haberse asociado a peor pronóstico en melanoma<sup>13-15</sup>, también se han propuesto como otra de las alteraciones moleculares característicamente adquirida en el modelo de progresión tanto en melanoma como en tumores spitzoides atípicos o melanoma spitzoide<sup>9,16</sup>.

En conclusión, existe un grupo de tumores melanocíticos en los que la distinción morfológica entre melanoma y lesión benigna es muy difícil o imposible. Es por ello que algunas de las

alteraciones citogenéticas identificables pueden ser de apoyo al diagnóstico de melanoma porque se asocian con un peor pronóstico, pero todavía no se ha demostrado adecuadamente su utilidad diagnóstica. En la práctica clínica estas técnicas moleculares se usan en situaciones de elevada incertidumbre, donde pueden aportar información valiosa, pero no parece que sean suficientes para un diagnóstico preciso.

## Pregunta 2. ¿Los perfiles de expresión genética permiten una mejor clasificación en grupos de riesgo de progresión a los pacientes con melanoma en estadio I-II de la AJCC 2017? ¿Sus resultados pueden modificar la actitud terapéutica?

### Resumen de la evidencia

A fecha actual las guías de melanoma revisadas<sup>6, 7, 17, 18</sup> no recomiendan su uso de forma rutinaria para estratificar el riesgo de progresión, ni tampoco se ha establecido en quiénes, en qué momento, ni qué tipo de perfil genético serían aplicables<sup>6, 7</sup>. No existe suficiente evidencia científica sobre su validez y valor diagnóstico, como para recomendar su uso en práctica clínica. Su utilización fundamental es en el contexto de estudios de investigación o ensayos clínicos. No se ha evaluado el impacto psicológico negativo de la clasificación de mal pronóstico.

Nivel de evidencia: 2b.

### Recomendaciones

No recomendamos el uso de perfiles de expresión genética como parte rutinaria de la estadificación de melanoma, puesto que no existe suficiente evidencia científica sobre su utilidad.

Fuerza de la recomendación: B

### Calidad de la evidencia

El uso de “firmas de expresión génica” (*genetic expression profile, GEP*) en el tumor primario puede ayudar a una mejor clasificación pronóstica acorde al riesgo de recaída o muerte causada por melanoma de un paciente, más allá de la clasificación clínico-patológica de la AJCC 2017 o del estatus del ganglio centinela.

Se han diseñado diferentes combinaciones de firmas de expresión genética tumoral en melanoma asociadas a peor pronóstico. Diversos estudios retrospectivos y algunas series prospectivas demostraron que ciertos perfiles de expresión molecular pueden ser marcador independiente, ajustado a Breslow y la clasificación clínico patológica de la AJCC, de riesgo de metástasis/recaída o muerte por melanoma<sup>19</sup>. Los principales perfiles publicados son los desarrollados por la empresa americana Castle (MelanomaDX)<sup>20, 21</sup>, pero también existen otros como Melagenix, y SkylineDx.

La mayoría de los estudios, de diseño retrospectivo y basados en el perfil de expresión de los 31 genes de MelanomaDx, demuestran que los tumores con perfil “clase 2” tienen peor pronóstico, siendo un predictor independiente de riesgo, pero no hay suficiente robustez en un amplio espectro de melanomas. Globalmente se demostró que el porcentaje de supervivencia libre de recaída a los 5 años era de un 88% en la clase 1 frente a 52% en clase 2. De igual forma, el porcentaje de supervivencia libre de metástasis a distancia a los 5 años era del 93% para melanomas clase 1 frente a 60% en los de clase 2. En el análisis multivariante, tanto la firma genética GEP, como Breslow y estatus de GC fueron marcadores de riesgo independiente. (Hazard ratio respectivamente para tiempo libre de recidiva; HR = 2,1, 1,2, y 2,5;  $p < 0,001$  para cada uno de ellos; y para supervivencia libre de metástasis a distancia: HR = 2,7, 1,3 y 3,0; con  $p < 0,01$  para cada uno)<sup>22</sup>.

Uno de los mayores estudios prospectivos analizando varias cohortes con un total de 322 pacientes afectados de melanoma demostró en el análisis intermedio al año y medio de seguimiento, que la firma GEP ayuda a subclasificar según riesgo de recaída de los pacientes. En el análisis multivariante se demuestra que el perfil GEP, junto con Breslow e índice mitótico son predictores de recurrencia. Sin embargo, el único factor independiente de predicción de metástasis a distancia y supervivencia global fue el grosor tumoral<sup>23</sup>.

Recientemente se ha publicado el perfil GEP en pacientes estadio I y IIA, demostrando que el 70% de los pacientes que metastatizan (a pesar de BSGC negativa) presentan tumores clase 2<sup>24</sup>. En el único estudio multicéntrico prospectivo desarrollado en España, incluyendo 86 pacientes con estadios IB y IIA (AJCC 2017)<sup>25</sup>, se demostró en una mediana de seguimiento de 12 meses (rango intercuartílico de 5-21 meses), que un 8,1% presentaron recaídas siendo todos ellos de perfil GEP clase 2 (representando el 21,2% de pacientes incluidos de clase 2). Los pacientes con tumor clase 2 tenían una supervivencia estadísticamente menor que los de clase 1, con un HR de 28,37 en el análisis univariante, y de 18,82 en el multivariante. Esta subclasificación de pacientes con una biopsia selectiva de ganglio centinela negativa, mejoraría la estadificación de la AJCC y permitiría identificar aquellos que merecen un seguimiento radiológico intensivo y posiblemente ofrecerles adyuvancia, pues su riesgo de recaída sería superior que un estadio IIIA.

Sin embargo, no existe suficiente evidencia científica, faltan estudios prospectivos con largo seguimiento de los pacientes, y en su mayoría comparan el GEP con factores pronósticos conocidos: BSGC, AJCC, Breslow dicotómico (1mm), pero no solapan y combinan factores pronósticos. Faltan modelos multivariantes de predicción combinando con todos los factores

clínico-patológicos vigentes (como sexo, edad, localización del tumor, Breslow, ulceración, índice mitótico, invasión linfovascular, satelitosis microscópica, estatus del ganglio centinela) para definir lo que estas nuevas técnicas añaden a los criterios previos<sup>7</sup>.

## BLOQUE 2. Biopsia y tratamiento quirúrgico del tumor primario.

Pregunta 3. Ante un paciente con una lesión pigmentada en la zona facial o acral, donde la exéresis completa puede conllevar alteraciones estéticas o funcionales, la biopsia escisional comparada con la incisional (huso, biopsia en sacabocados) y comparada con la biopsia por afeitado, ¿ofrece un diagnóstico correcto en un porcentaje mayor de casos?

### Resumen de la evidencia

Tanto la biopsia incisional como el afeitado ofrecen peor fiabilidad que la biopsia escisional en el diagnóstico del melanoma<sup>26</sup>.

Nivel de evidencia: 2b.

### Recomendaciones

Sugerimos emplear la biopsia escisional para la confirmación histológica del melanoma. Sin embargo, en lesiones grandes localizadas en zonas como la cara o las partes acras donde esta puede conllevar alteraciones estéticas o funcionales importantes se puede emplear una biopsia parcial, conociendo las limitaciones que éstas ofrece para el diagnóstico correcto del melanoma<sup>6, 7, 18</sup>.

Fuerza de la recomendación: B

### Calidad de la evidencia

La biopsia escisional es la técnica de elección para la confirmación histológica del melanoma. Sin embargo, en lesiones grandes y en localizaciones como la cara o las zonas acrales realizar la exéresis de toda la lesión puede ser dificultoso. En estos casos se acepta la realización de una biopsia parcial de la zona más sospechosa. Hoy en día, la utilización de métodos diagnósticos complementarios como la dermatoscopia y la microscopia confocal de reflectancia (MCR) permite una mejor selección de las áreas más sospechosas donde realizar la biopsia<sup>27, 28</sup>.

Existen muy pocos estudios que comparen la precisión diagnóstica entre las distintas técnicas de biopsia. Un estudio transversal de casos consecutivos comparó la biopsia escisional con la biopsia en sacabocados y la biopsia por afeitado en el diagnóstico de melanoma<sup>29</sup>. En este estudio, no reproducido en otros centros, la biopsia en sacabocados llevó a un error en el diagnóstico en el 23,3% de los casos, frente al 4,5% de la biopsia por afeitado y el 1,7% de la biopsia escisional. En este estudio los errores diagnósticos de la biopsia en sacabocados estaban más relacionados con errores de interpretación de la histología (78%) que con errores de la selección del lugar de la misma. Los errores en la interpretación histológica se deben a la imposibilidad de valorar en una biopsia parcial importantes criterios histológicos del melanoma como la simetría de la lesión o los márgenes laterales de la misma. De este trabajo, resulta sorprendente los excesivos errores diagnósticos que se relacionaron con la biopsia en sacabocados. Sin embargo, sí que parece claro que la biopsia escisional es la que ofrece una mayor fiabilidad diagnóstica para el reconocimiento del melanoma.

El posible error que una biopsia parcial puede condicionar la estimación del Breslow del melanoma, el estadiaje y de la consecuente planificación terapéutica ha sido ha sido objeto de varios estudios. Los cambios en el Breslow suficientes como para cambiar el estadiaje del tumor se produjeron en el 7%-34% de las biopsias en sacabocados y en el 3%-19% de las biopsias por afeitado<sup>30-36</sup>. La cirugía adicional consecuencia de estos cambios ocurrió en 3,3%-5%<sup>32, 36</sup> de las biopsias por afeitado y el 18% de las biopsias en sacabocados<sup>32, 34</sup>.

En el caso concreto de las lesiones pigmentadas faciales, a menudo plantean un diagnóstico diferencial entre distintos tipos de lesiones superficiales como el lentigo maligno, el lentigo solar y la queratosis actínica pigmentada. En estos casos, aparte de una correcta selección del área más sospechosa, la biopsia mediante un afeitado hasta dermis permitirá el estudio de una mayor cantidad de epidermis que una biopsia en sacabocados<sup>26</sup>. Sin embargo, será menos útil para determinar el índice de Breslow en caso de que el diagnóstico fuera el de lentigo maligno melanoma.

#### Pregunta 4. Ante un paciente con sospecha de melanoma, la biopsia incisional/parcial comparada con la biopsia escisional, ¿empeora la supervivencia?

##### Resumen de la evidencia

Múltiples estudios han demostrado que la realización de una biopsia parcial no empeora la supervivencia en el melanoma<sup>7, 18, 26</sup>.

Nivel de evidencia: 2b.

##### Recomendaciones

Sugerimos emplear la biopsia escisional para la confirmación del diagnóstico del melanoma y como primer tratamiento del tumor primario. Sin embargo, en algunas circunstancias como tumores grandes en la cara o las partes acras la biopsia escisional puede conllevar grandes defectos quirúrgicos que obliguen al desplazamiento del tejido circundante o la cobertura mediante un injerto. En estos casos se puede emplear una biopsia incisional para la confirmación diagnóstica. Se ha demostrado que la realización de ésta no se relaciona con un empeoramiento de la supervivencia o con un mayor riesgo de metástasis<sup>7, 18</sup>.

Fuerza de la recomendación: B

##### Calidad de la evidencia

El impacto del tipo de biopsia inicial en el pronóstico del melanoma ha sido evaluado en varios trabajos. En la mayoría de ellos no se observan cambios en la supervivencia del melanoma en función del tipo de biopsia inicial que se realizó<sup>33, 37-41</sup>. Recientemente, un metaanálisis ha evaluado la influencia del tipo de biopsia inicial en la supervivencia libre de enfermedad y la supervivencia específica por melanoma<sup>42</sup>. La evaluación de 5 estudios (4 de ellos retrospectivos) con 3249 pacientes [1121 (34,5%) en el grupo con una biopsia parcial inicial y 2128 (65,5%) en el grupo de biopsia escisional directa] no demostró diferencias en la

supervivencia libre de enfermedad (RR: 1,27; 95%CI 0,97-1,67; p=0,09) ni en la supervivencia específica de melanoma (RR: 1,50; 95%CI 0,98-2,30; p=0.06) en función del tipo de biopsia inicial realizada.

Otros estudios se han centrado en valorar el impacto del tipo de biopsia inicial en el riesgo de afectación del ganglio centinela (GC). En todos ellos se ha demostrado que el tipo de biopsia inicial del melanoma no se relaciona con un aumento de riesgo de afectación del GC<sup>33, 39, 43</sup>.

Pregunta 5. En pacientes a los que se les ha diagnosticado histológicamente un melanoma in situ (estadio 0), la extirpación de un margen de 10 mm frente a otro de 5 mm, ¿disminuye el porcentaje de recurrencias locales?

### Resumen de la evidencia

No existen ensayos clínicos aleatorizados que comparen los resultados de una extirpación con márgenes de 5 mm vs 10 mm en los casos de melanoma in situ. La recomendación de la extirpación con 5 mm de márgenes en los casos de melanoma in situ fue basada en un consenso de expertos, aunque algunos trabajos posteriores sugieren que ésta podría ser válida. Sin embargo, los márgenes de 5 mm podrían no ser adecuados en algunos contextos clínicos<sup>7,</sup>

18, 26.

Nivel de evidencia: 5.

### Recomendaciones

En la mayoría de los melanomas in situ, recomendamos la extirpación con un margen de 5 mm, que es suficiente para garantizar un correcto control local. Sin embargo, en algunas situaciones clínicas, en especial los lentigos malignos de cabeza sugerimos emplear un margen mayor o cirugía con control de márgenes si es posible.

Fuerza de la recomendación: D

### Calidad de la evidencia

Los márgenes adecuados para la escisión de un melanoma in situ no han sido objeto de estudios mediante ensayos clínicos aleatorizados<sup>44</sup>. La recomendación de una escisión con márgenes de 5 mm fue adoptada por consenso en 1992. Desde entonces, algunos trabajos posteriores sugieren que estos márgenes son adecuados en los melanomas in situ de tipo diferente al lentigo maligno (LM)<sup>45, 46</sup>. Sin embargo, en los trabajos donde se incluyen casos de

melanoma in situ tipo LM los márgenes de 5 mm serían insuficientes<sup>47</sup>. Los casos de LM requerirían un margen de seguridad más amplio o bien el abordaje mediante una cirugía con control de márgenes.

Un reciente trabajo ha comparado los márgenes necesarios para la extirpación adecuada del tumor tanto en una serie de 1509 lentigos malignos como en otra de 829 melanomas in situ que habían sido operados con cirugía de Mohs<sup>48</sup>. Concluyen que el margen necesario para extirpar la totalidad del tumor en el 97% de los casos tanto de LM como de otros melanomas in situ es un margen de 9 mm. Sin embargo, el estudio presenta una importante limitación, los autores admiten que el empleo del diagnóstico de LM no había sido homogéneo entre sus patólogos. La asignación del tumor en cada grupo no había sido reevaluada teniendo en cuenta criterios como la localización del tumor primario o el grado de daño solar en la pieza histológica, con lo que podría haber casos de LM en el grupo de otros melanomas in situ, que podría distorsionar los resultados del trabajo<sup>49</sup>.

Otra limitación importante de los trabajos que analizan los márgenes quirúrgicos necesarios para la correcta extirpación del melanoma in situ es la ausencia de información de cómo se establecieron los mismos. En el caso concreto del LM es conocido su frecuente extensión más allá de los márgenes clínicos detectados con la inspección visual. La utilización de métodos diagnósticos complementarios como la dermatoscopia o la microscopia confocal de reflectancia (MCR) resulta útil en una mejor delimitación de los márgenes reales del LM<sup>50</sup>.

## BLOQUE 3. Tratamiento del lentigo maligno.

Pregunta 6. En pacientes a los que se les ha diagnosticado histológicamente un lentigo maligno, la extirpación de un margen de 10 mm frente a un margen de 5 mm frente a la realización de cirugía con control de márgenes al microscopio ¿consigue una menor tasa de recidivas locales?

### Resumen de la evidencia

Si bien no hay ensayos clínicos controlados aleatorizados que comparen los diferentes procedimientos quirúrgicos para el tratamiento del lentigo maligno (LM), múltiples estudios de las guías revisadas<sup>6, 7, 26</sup> sugieren que:

- Para LM grandes, pueden ser necesarios márgenes >0,5 mm para obtener márgenes histológicamente negativos debido a la extensión subclínica.
- La cirugía con control de márgenes al microscopio presenta mejores porcentajes de curación y recidivas menos frecuentes con respecto a la cirugía convencional.

Las recomendaciones de extirpación están basadas en márgenes clínicos medidos por el cirujano, no en márgenes histológicos medidos por el patólogo.

Nivel de evidencia: 4.

### Recomendaciones

Si se realiza exéresis convencional, sugerimos emplear, cuando sea posible, márgenes de más de 5 mm (hasta 10 mm).

Siempre que sea posible sugerimos usar técnicas que permitan una valoración histológica exhaustiva de los márgenes: la escisión seriada con cortes permanentes incluidos en parafina o cirugía de Mohs.

Recomendamos el estudio de la pieza central del tumor en cortes permanentes para la identificación y estadificación apropiada de un potencial componente invasivo.

Fuerza de la recomendación: C

## Calidad de la evidencia

Ciertos subtipos de melanoma in situ como el LM y el melanoma lentiginoso acral son más propensos a la extensión subclínica periférica y/o enfermedad multifocal microscópica adyacente.

Múltiples estudios observacionales de cohortes sugieren que los márgenes de 5 mm, originalmente recomendados por la declaración de consenso de *National Institutes of Health* (NIH) en 1992, pueden ser inadecuados para obtener márgenes histológicamente libres para el LM en cabeza y cuello, presentando unas tasas de recidiva entre 6% y 20%<sup>26, 45-48, 51-55</sup>.

Por ello, la extirpación completa puede necesitar márgenes más amplios, de 0,5-1cm, o técnicas de control de margen que permitan una evaluación histológica completa de los márgenes periféricos.

En ausencia de ensayos clínicos que estudien los márgenes de exéresis estándar, se recomienda este rango de margen basado en el consenso del panel, los datos de los estudios retrospectivos citados, y los resultados de un gran estudio prospectivo de 1520 pacientes con LM intervenidos mediante cirugía de Mohs, que muestra que es necesario un margen de 9 mm para extirpar la totalidad del tumor en el 97% de los casos<sup>47, 48</sup>.

Existen dos técnicas principales de cirugía de Mohs para el melanoma in situ: cirugía de Mohs tradicional y la cirugía de Mohs modificada. La principal diferencia está en la configuración de la extirpación y en el uso de cortes congelados o permanentes para la valoración de los márgenes. La valoración histológica de los bordes es difícil porque en las zonas expuestas el LM y la hiperplasia melanocítica pueden confundirse. Esta distinción es más difícil en cortes en congelación, siendo preferibles las técnicas que utilizan cortes en parafina ya que permiten una mejor evaluación de la arquitectura y la morfología celular, tanto con hematoxilina eosina como con la ayuda de tinciones inmunohistoquímicas, en concreto, el MELAN-A/MART1 y, sobre todo, el MITF o el SOX10, que al ser tinciones nucleares permiten identificar mejor los melanocitos<sup>7, 52</sup>. Por ello, se consideran el estándar para la valoración histológica de las lesiones melanocíticas<sup>56, 57</sup>.

Se han descrito varias técnicas de cirugía de Mohs modificada con cortes en parafina: el procedimiento del cuadrado “square” (y sus variedades), la técnica del espagueti (y sus variedades), “slow Mohs”, escisión seriada con cortes verticales radiales, y técnicas de escisión seriada mapeada<sup>58-68</sup>.

Actualmente no existen ensayos clínicos aleatorizados que comparen la cirugía con control de márgenes al microscopio con la cirugía convencional. Las recomendaciones se basan en varios estudios observacionales y en opiniones de expertos. Dos estudios observacionales retrospectivos de un único centro han evaluado los resultados de ambas técnicas quirúrgicas en términos de recidiva<sup>53, 69</sup>. Hou et al.<sup>53</sup>, estudiaron 423 LM, observando unos menores riesgos de recidiva con cirugía micrográfica de Mohs (1,9% vs 5,9%) en el periodo de seguimiento. Nosrati et al.<sup>69</sup> comparan los datos de los pacientes intervenidos con cirugía de Mohs vs cirugía convencional incluidos en una base de datos prospectiva. Obtienen unos riesgos menores de recidiva con cirugía de Mohs (1,1% vs 4,1%) a los 5 años sin alcanzar la significación estadística. Tampoco observaron diferencias significativas en supervivencia global o supervivencia específica de melanoma. Ambos estudios son observacionales, y en los dos existen diferencias en las características de los pacientes tratados con cirugía de Mohs y cirugía convencional, pero este sesgo de selección parece reforzar el mensaje pues la cirugía de Mohs se empleó en lesiones más grandes y peor definidas, especialmente en la cara, el resto de la cabeza y el cuello.

En un estudio retrospectivo en pacientes con LM localizados en la cabeza tratados con slow Mohs o cirugía convencional, Hilari et al.<sup>52</sup> llegan a la conclusión de que en estas lesiones son precisos márgenes mayores de 0,5 cm, fundamentalmente en lesiones recidivadas, pobremente delimitadas, localización centrofacial y las lesiones que se presentan en pacientes con fototipos altos.

La cirugía de Mohs y las técnicas que utilizan cortes permanentes con o sin inmunohistoquímica para el tratamiento del LM, continúan en evolución<sup>70-73</sup>. En ambos casos, la mayoría de los estudios demuestran mejor valoración de márgenes, menor porcentaje de recidiva local y mejores porcentajes de curación. Solo un estudio retrospectivo compara la escisión seriada con cortes en parafina con la cirugía micrográfica de Mohs convencional, obteniendo menos recidivas al usar cortes en parafina.<sup>51</sup>

Pregunta 7. En pacientes a los que se les ha diagnosticado histológicamente un lentigo maligno y en los que la cirugía no es una opción adecuada, el tratamiento con radioterapia frente al tratamiento con imiquimod frente al tratamiento con crioterapia frente a la observación ¿qué resultados ofrecen en cuanto a supervivencia?

### Resumen de la evidencia

Sólo existe un ensayo clínico aleatorizado que compara el imiquimod en monoterapia vs combinado con tazaroteno al 0,1% en gel. Las lesiones fueron extirpadas tras el estudio por lo que no se pudo tener información sobre la curación clínica. Con las mismas limitaciones, en un estudio fase II, los pacientes que obtuvieron curación histológica con imiquimod fueron el 37%.

La revisión sistemática de Read<sup>74</sup> et al describe porcentajes de recurrencia en torno al 13% con radioterapia (datos obtenidos de estudios observacionales retrospectivos), en torno al 25% con imiquimod y al 35% con láser (los estudios prospectivos existentes describen 100% de recurrencias en el tratamiento con láser). No se incluyeron datos sobre el uso de crioterapia. En general, la validez de la evidencia es pobre.

Nivel de evidencia:4

### Recomendaciones

Siempre que sea posible sugerimos emplear el tratamiento quirúrgico. Cuando este no sea factible, la radioterapia o el imiquimod son opciones a discutir, aunque parecen asociarse con porcentajes más elevados de recurrencias que obliga a un seguimiento más estrecho. El láser parece ofrecer resultados peores.

Los datos sobre crioterapia y laser son escasos, convirtiéndolos en opciones poco recomendables.

En LM grandes, pacientes muy ancianos, con comorbilidades, en los que un tratamiento agresivo sería inapropiado, puede ser adecuada la observación clínica. Si en el seguimiento se detectan cambios clínicos o dermatoscópicos significativos, debe realizarse una biopsia de las áreas sospechosas para confirmar enfermedad invasiva.

Fuerza de la recomendación: C

### Calidad de la evidencia

Solo existen dos ensayos clínicos que valoren la eficacia del imiquimod en el LM y sólo uno de ellos es un ensayo clínico aleatorizado.

Actualmente, está en marcha un ensayo clínico aleatorizado multicéntrico multipaís (RADICAL) a cargo de ANZMTG para comparar los resultados de la radioterapia (RT) vs imiquimod para LM complejos donde la cirugía no es posible o se rechaza.

Marsden et al.<sup>75</sup> publicaron recientemente un ensayo clínico fase II con un único brazo de imiquimod utilizando una pauta de hasta 60 aplicaciones durante 12 semanas, seguido de exéresis quirúrgica. En la exéresis post-tratamiento se observó la curación histológica en el 37%, por lo que consideraron inadecuada la realización de ensayo clínico frente a cirugía. Sin embargo, quedan dudas sobre el posible empleo de dosis más elevadas y sobre la interpretación histológica de las regresiones parciales.

Hyde et al.<sup>76</sup> publicaron el único ensayo clínico aleatorizado de imiquimod que compara la monoterapia (5 días/semana/3 meses) vs adyuvancia con tazaroteno al 0,1% gel durante 12 semanas previa a la escisión seriada y análisis de la pieza. El porcentaje de curación histológica fue mayor con el tratamiento combinado (78% vs 64%), sin alcanzar significación estadística ( $p = 0,17$ ). Al haber sido extirpadas todas las lesiones al final del estudio no podemos saber cuál es el resultado clínico real de los tratamientos probados. Este ensayo<sup>76</sup> fue el único estudio que cumplió los criterios de inclusión de una revisión sistemática Cochrane de los tratamientos para el LM<sup>44</sup>.

Se ha descrito que los resultados son mejores cuando se administra el tratamiento incluyendo un margen aproximado de 2 cm de piel clínicamente sana, 5 o más veces a la semana durante al menos 12 semanas (60 tratamientos) y si hay una respuesta inflamatoria<sup>77-80</sup>. Sin embargo, la ausencia de inflamación no descarta un resultado favorable en adyuvancia tras la cirugía<sup>81</sup>.

Existen dos revisiones sistemáticas sobre el uso de imiquimod en el LM: Mora et al.<sup>78</sup> y Tio et al.<sup>80</sup> revisaron 45 y 41 estudios respectivamente, caracterizados por protocolos variables y duraciones de seguimiento cortas. Ambos autores concluyeron que el imiquimod es una opción para pacientes no candidatos o que rechazan la cirugía y/o RT. Recomiendan un régimen de

tratamiento intensivo de más de 60 aplicaciones con una frecuencia de 6 a 7 aplicaciones por semana. Las tasas de curación reportadas fueron de 76–77% para curación histológica y 78% para curación clínica. En resumen, el nivel de evidencia permanece bajo, tanto para el tratamiento inicial como en adyuvancia.

En cuanto a la RT, la interpretación de los datos publicados es complicada por tamaños de muestra pequeños, variación en los tipos de RT, diferentes esquemas de dosis, seguimientos variables, ausencia de datos a largo plazo y de confirmaciones histológicas. Series de casos pequeñas en los años 70 utilizaban RT convencional de ortovoltaje para el tratamiento de LM y LMM con porcentajes de recidiva de 0% a 14%<sup>82-84</sup>.

Después, 3 grandes estudios observacionales de cohortes retrospectivos europeos, publicaron el uso de RT superficial/ultrasoft/soft X-ray o rayos Grenz (técnica de Miescher) con porcentajes de recidiva del 0% al 17%<sup>85-87</sup>. Hedblad et al.<sup>86</sup>, describen el tratamiento de LM y LMM precoz con RT superficial en 593 pacientes. Este estudio valora los resultados de 3 tipos de tratamiento incluyendo RT primaria, cirugía parcial seguida de RT, y cirugía radical seguida de RT para prevención de recaída. Los porcentajes de curación completa fueron de 83%, 90% y 97%, respectivamente.

Fogarty et al.<sup>88</sup>, realizan una revisión de la literatura no sistemática, incluyendo 9 estudios de cohorte retrospectivos de un solo centro sobre la RT primaria para el LM publicados hasta 2009 (no incluye el estudio de Hedblad et al.<sup>86</sup>). En total incluyen 537 pacientes, con una mediana de seguimiento de 3 años. En los resultados se obtienen 18 recidivas locales de 349 (5%), con progresión a LM invasivo en 5 pacientes (1,4%), 5 recidivas marginales (4%) y 8 en el campo de tratamiento (5%). Sin embargo, se utilizaron diferentes parámetros de tratamiento y dosis que limitan las recomendaciones sobre el tratamiento de LM con RT.

Lee et al.<sup>89</sup> realizaron una revisión de series de casos retrospectivos que compara el tratamiento del LM con cirugía, RT y láser de CO2 ablativo. Los autores encontraron menores tasas de recidiva con cirugía y laser CO2. Sin embargo, los resultados no fueron estadísticamente significativos.

La revisión sistemática de Read et al.<sup>74</sup> describe porcentajes de recurrencia en torno al 13% con radioterapia (datos obtenidos de estudios observacionales retrospectivos), en torno al 25% con imiquimod y al 35% con láser (los estudios prospectivos existentes describen 100% de

recurrencias con láser). No se incluyeron datos sobre el uso de crioterapia, a pesar de que es un tratamiento bastante extendido<sup>90</sup>.

## BLOQUE 4. Pruebas de estadificación y seguimiento

Pregunta 8. En pacientes a los que se les ha diagnosticado un melanoma, la realización de pruebas de imagen y/o de laboratorio frente a la exploración clínica y anamnesis, ¿se traduce en un aumento de la supervivencia global?

### **Resumen de la evidencia**

Las pruebas complementarias son útiles para la detección precoz de las metástasis clínicamente ocultas, sobre todo a partir del estadio III, siendo especialmente relevantes para una correcta estadificación y un tratamiento sistémico adecuado precoz. No se ha demostrado que esto incida directamente en una mejora de la supervivencia de los pacientes y hay que tener en cuenta la proporción de falsos positivos.

Nivel de evidencia: 2a

### **Recomendaciones**

En estadios iniciales (I-II) recomendamos que la realización de pruebas complementarias debe estar guiada por signos y síntomas que hagan sospechar metástasis. En estadios avanzados se recomienda la realización de pruebas complementarias para estadificar correctamente y llevar a cabo el tratamiento adecuado.

Fuerza de la recomendación: B

### **Calidad de la evidencia**

Se ha demostrado que con la exploración física se pueden detectar muchos casos de metástasis sincrónicas<sup>91</sup>. La ecografía y el PET-TAC se muestran como pruebas muy sensibles y específicas para la detección precoz de metástasis ganglionares y a distancia respectivamente, siendo el PET-TAC superior al TAC en el metanálisis de estudios observacionales de Xing et al<sup>92</sup>. En otro meta-análisis de estudios observacionales se demuestra superioridad en la detección de

afectación ganglionar con la ecografía respecto a la palpación<sup>93</sup>. Resultados similares se obtienen en el estudio de cohortes de Voit et al<sup>94</sup>. En otro estudio de cohortes de 2004 la combinación de exploración física y ecografía detectó la gran mayoría de metástasis macroscópicas ganglionares frente a otras pruebas complementarias<sup>95</sup>. El estudio retrospectivo de Olmedo et al. sobre 384 pacientes demostró, además, que el estudio ecográfico previo a la biopsia de ganglio centinela era una herramienta coste-efectiva<sup>96</sup>.

| Escenario clínico                       | Técnica de imagen | Sensibilidad<br>%(IC95%) | Especificidad<br>%(IC95%) |
|-----------------------------------------|-------------------|--------------------------|---------------------------|
| Estudio basal de ganglios               | TAC               | 9 (1-52)                 | 92 (50-99)                |
|                                         | PET-TAC           | 11 (1-50)                | 97 (78-100)               |
| Seguimiento de ganglios                 | TAC               | 61 (15-93)               | 97 (70-100)               |
|                                         | PET-TAC           | 65 (20-93)               | 99 (92-100)               |
| Estudio basal de metástasis a distancia | TAC               | 51 (24-76)               | 69 (30-92)                |
|                                         | PET-TAC           | 80 (53-93)               | 87 (54-97)                |
| Seguimiento de metástasis a distancia   | TAC               | 63 (46-77)               | 78 (58-90)                |
|                                         | PET-TAC           | 86 (76-93)               | 91 (79-97)                |

Tomado de Xing et al<sup>92</sup>.

Diferentes estudios de cohortes retrospectivas ponen de manifiesto una escasa utilidad del TAC basal y la radiografía de tórax basal, con altas proporciones de falsos positivos<sup>97-101</sup>. Además el diagnóstico precoz de metástasis pulmonares por radiografía de tórax no ha demostrado aumentar la supervivencia global<sup>102</sup>.

Respecto al PET diversos estudios de cohortes demuestran una baja sensibilidad, pero alta especificidad en el diagnóstico de metástasis ganglionares y a distancia<sup>103, 104</sup>. Estudios más recientes como el retrospectivo descriptivo publicado en 2014 por autores de Nebraska ponen en cuestión la utilidad real del PET como estudio basal<sup>105</sup>.

La única revisión sistemática de estudios observacionales llevada a cabo para estudiar la validez del PET y el PET-TAC en el estudio basal del melanoma halló una sensibilidad y especificidad de 68%-87% y 92%-98% respectivamente en estadios III-IV frente a una sensibilidad y especificidad de 0%-67% y 77%-100% respectivamente en estadios I-II<sup>106</sup>.

La realización de una resonancia magnética (RMN) puede resultar más útil en el diagnóstico de metástasis cerebrales ocultas, aunque algunos estudios concluyen que realmente se detectan sobre todo en pacientes con estadio IIIC o mayor<sup>107</sup>.

En cuanto a la ecografía abdominal se ha demostrado una baja sensibilidad en el diagnóstico de las metástasis y puede tener limitaciones en el estudio del espacio paraaórtico y retroperitoneal sobre todo en pacientes obesos<sup>108</sup>.

Respecto a las pruebas de laboratorio, aparte de los niveles de LDH, se ha descrito la utilidad de otros parámetros como la proteína S100b, MIA o el p-proteasoma. Pueden resultar pruebas sensibles para el diagnóstico precoz de metástasis, pero no se ha demostrado que se traduzca en mejoras de los resultados clínicos<sup>109-112</sup>.

En resumen, las pruebas complementarias pueden resultar útiles para la detección precoz de la enfermedad avanzada. La importancia de este diagnóstico radica en iniciar tempranamente tratamientos sistémicos eficaces en el tratamiento del melanoma metastásico. No hay estudios suficientes que corroboren que un diagnóstico basal precoz de la enfermedad metastásica se correlacione con un mejor pronóstico. Sin embargo, en algunos ensayos clínicos de los nuevos tratamientos del melanoma metastásico, una baja carga de la enfermedad se ha relacionado con una mayor eficacia de estos fármacos. Las guías NCCN, alemana y australiana recomiendan tan sólo la realización de ecografía previa a la realización de la biopsia de ganglio centinela, mientras que la guía de la AAD considera realizar TAC o PET-TAC cuando se constata afectación ganglionar<sup>6, 7, 18, 26</sup>. En todas las guías se pone en duda el valor real de las analíticas en el estudio inicial. Hay que tener en consideración que la exploración física y una anamnesis dirigida nos pueden mostrar signos y síntomas que nos hagan sospechar la metástasis, sobre todo en estadios iniciales (I-II). En estadios más avanzados, en los que la probabilidad de extensión es mayor, podría considerarse la realización de pruebas complementarias iniciales para una correcta estadificación y tener una imagen basal con la que comparar y tratamiento sistémico

adecuado en caso de detectar metástasis, siempre teniendo en cuenta la posibilidad de falsos positivos.

Pregunta 9. En pacientes diagnosticados y tratados por un melanoma, que se encuentran en seguimiento, la realización de pruebas de imagen y/o de laboratorio frente a la autoexploración y la exploración clínica durante las visitas de seguimiento, ¿se traduce en un aumento de la supervivencia global?

### **Resumen de la evidencia**

La realización rutinaria de pruebas complementarias en el paciente con melanoma puede no resultar coste-efectiva en estadios iniciales. Sin embargo, algunos estudios han demostrado una mayor supervivencia en pacientes con metástasis diagnosticadas en fase asintomática cuando son subsidiarias de un tratamiento temprano con intención curativa (menos carga tumoral o tumor resecable quirúrgicamente). Los estudios sobre esta pregunta son previos a la introducción de la adyuvancia.

Nivel de evidencia: 2a

### **Recomendaciones**

En estadios iniciales se recomienda el seguimiento periódico del paciente con una correcta exploración física y anamnesis dirigida a detectar posibles síntomas de metástasis. La realización de pruebas de imagen y de laboratorio podrían resultar más útiles a partir del estadio IIB. Fuerza de la recomendación: B

En pacientes con ganglio centinela positivo con micrometástasis a los que no se les practica el vaciamiento ganglionar, recomendamos la realización de ecografía ganglionar periódica. Fuerza de la recomendación: A

### **Calidad de la evidencia**

En fases iniciales (estadio I) parece que las pruebas complementarias no son coste-efectivas<sup>26, 113, 114</sup>. Las pruebas más coste-efectivas en el seguimiento del paciente con melanoma son la anamnesis y la exploración física, ya que la mayoría de las recurrencias son locorregionales y

detectadas por el propio paciente, y las pruebas complementarias, además de costosas, tienen falsos positivos y parecen no mejorar la supervivencia global de los pacientes<sup>115-117</sup>.

Hay diversos estudios de casos y controles que analizan la supervivencia en función de en qué momento se detectan las metástasis. Esta podría ser mayor en las metástasis detectadas por el propio paciente en la autoexploración que en casos sintomáticos, o en los casos detectados en la exploración física o pruebas de imagen<sup>118</sup>. Por otro lado, la media de supervivencia es mayor en los pacientes a los que se les diagnostica la metástasis siendo asintomáticos frente a los casos sintomáticos<sup>119</sup>. Algunos estudios de casos y controles sin embargo no encuentran diferencias entre las recaídas sintomáticas y asintomáticas ni entre los casos con metástasis detectadas por el propio paciente frente a las detectadas por el médico<sup>91, 120</sup>. Otros estudios prospectivos de cohortes sí demuestran una mayor supervivencia global con el diagnóstico precoz de las metástasis cuando aún son resecables<sup>121, 122</sup>.

En cuanto a las pruebas de imagen cerebral, la guía NCCN<sup>6</sup> recomienda su realización a partir del estadio IIIC debido a la morbilidad que pueden provocar las metástasis cerebrales cuando son sintomáticas y a la mejor respuesta a los tratamientos cuando la carga tumoral es menor, aunque sin demostrar realmente una mayor supervivencia<sup>123</sup>.

En pacientes con ganglio centinela positivo con micrometástasis a los que no se les practica el vaciamiento ganglionar, la realización de ecografía ganglionar periódica supone el estándar de tratamiento, ya que es el empleado en los ensayos clínicos en los que se basa la recomendación de no realizar linfadenectomía: estudio ecográfico cada 4 meses durante los dos primeros años y posteriormente cada 6 meses a partir del tercer año<sup>124, 125</sup>.

En algunos estudios retrospectivos longitudinales el PET-TAC no se ha mostrado eficaz para el diagnóstico precoz de las metástasis<sup>126</sup>. Sin embargo, su utilidad podría radicar en su valor predictivo negativo, siendo especialmente importante a partir del estadio III aunque sin influir en la expectativa de vida del paciente<sup>127-130</sup>.

La radiografía de tórax detecta pocos casos de metástasis, y en los casos en los que lo hace suelen ser irresecables, sin mejorar por tanto la supervivencia, como se demuestra en estudios de cohortes y post hoc de ensayos clínicos<sup>131, 132</sup>. Lo mismo ocurre con las pruebas de laboratorio si no se acompañan de una clínica y/o pruebas radiológicas compatibles<sup>133, 134</sup>.

Un análisis prospectivo a 10 años de 290 pacientes con los estadios IIB, IIC y III evaluó las tasas de detección de imágenes con TAC toraco-abdomino-pélvico y resonancia magnética cerebral cada 6 meses durante 5 años tras el diagnóstico, seguido de una radiografía de tórax anual hasta el año 10. Casi 40% de los pacientes desarrollaron metástasis en una mediana de 1,4 años. Las pruebas de imagen detectaron el 56,7% de recurrencias (principalmente viscerales), en comparación con 41,5% de las recurrencias detectadas inicialmente por el paciente o el examen físico. La mayoría de las recurrencias detectadas clínicamente fueron cutáneas<sup>135</sup>.

En estadios iniciales la mayoría de las recaídas suelen ser locorregionales, y por tanto detectables en la autoexploración o con la exploración física. Todas las guías establecen que la exploración física y la anamnesis son esenciales en el seguimiento<sup>6, 7, 18, 26</sup>, antes que las pruebas complementarias. Sin embargo, a partir del estadio IIB algunas guías como la NCCN o la de la AAD sí consideran que pueden resultar útiles<sup>6, 7</sup>. Entre las pruebas disponibles sí parece que la radiografía de tórax tiene altas proporciones de falsos positivos y la guía australiana aconseja disminuir la frecuencia con la que se realiza esta prueba<sup>26</sup>. Las metástasis a distancia ocurren con más frecuencia a partir del estadio IIB-III y en estos casos sí podría ser útil la realización de pruebas complementarias para detectar la enfermedad avanzada que aún no ha provocado clínica. Aunque no hay estudios que demuestren claramente diferencias entre las metástasis detectadas por la exploración física y anamnesis y las detectadas por pruebas complementarias, en términos de supervivencia, parece que aquellos pacientes con metástasis diagnosticadas antes de que provoquen clínica sí podrían tener una mayor supervivencia global. En este sentido, disponer de técnicas sensibles y específicas como el PET-TAC o el TAC para diagnosticar precozmente estas metástasis e iniciar un tratamiento adecuado, sobre todo con la llegada de las nuevas terapias dirigidas e inmunoterapia, podría resultar especialmente útil en melanomas de riesgo (a partir de estadios IIB-III).

Pregunta 10. En pacientes a los que se les extirpó un melanoma hace 5 ó más años y que posteriormente no han desarrollado metástasis, el seguimiento por parte del dermatólogo frente al seguimiento por el médico de atención primaria frente a la autoexploración, ¿mejora la detección precoz de un segundo melanoma o la detección de recidivas?

### **Resumen de la evidencia**

La probabilidad de desarrollar recurrencias tras el diagnóstico de melanoma generalmente desciende con el paso del tiempo (sin alcanzar nunca cero), apareciendo más precozmente en estadios más avanzados. Esta probabilidad es más alta durante los primeros tres años, desciende ostensiblemente a los 5 años y es mucho menor a partir de los 10 años.

Por otro lado, el riesgo de desarrollar un segundo melanoma oscila entre el 2% y el 10%. Suelen aparecer durante los primeros años tras el diagnóstico del primer melanoma, aunque hay casos reportados a más de 30 años, siendo mayor el riesgo en pacientes con nevus displásicos o antecedentes familiares de melanoma.

Nivel de evidencia: 5

### **Recomendaciones**

Sugerimos realizar un seguimiento estrecho de los pacientes durante los primeros 5 años tras el diagnóstico para la detección de las recaídas y hasta los 10 años para el diagnóstico de segundos melanomas. El intervalo del seguimiento dependerá del estadio inicial y riesgos individuales del paciente. Por encima de los 10 años del diagnóstico sugerimos un cribado anual por parte del dermatólogo, salvo en casos de mayor riesgo donde la periodicidad dependerá del perfil de riesgo (piel clara, múltiples nevus melanocíticos, síndrome del nevus displásico, melanoma familiar).

Fuerza de la recomendación: D

## Calidad de la evidencia

La proporción de recaídas tardías (por encima de los 10 años) podría oscilar en torno al 2,4%-5,6%, con afectación principalmente locorregional, y con menor frecuencia a distancia (fundamentalmente cerebro y pulmón)<sup>122</sup>. En estudios de cohortes retrospectivas y de casos y controles se ha demostrado un mayor riesgo en pacientes de menos de 40 años, con índice de Breslow >2 mm y nivel de Clark IV/V<sup>136, 137</sup>.

El 80% de las recaídas de los pacientes con melanoma en estadio I ocurren durante los 3 primeros años, aunque menos del 8% se detectan entre los 5 a 10 años tras el diagnóstico inicial<sup>117</sup>. El riesgo de recaída alcanza su pico máximo en el primer año tras el diagnóstico de melanoma, siendo de 8 meses de media para las metástasis locorregionales y de hasta 24 meses para las viscerales. Además, las recaídas aparecen más tempranamente cuando los pacientes tienen enfermedad más avanzada en el diagnóstico inicial<sup>138</sup>. Resumidamente, los pacientes con enfermedad más avanzada en el momento de diagnóstico tendrán más probabilidad de recurrencia y esta además será más temprana.

Respecto al riesgo de desarrollo de un segundo melanoma los estudios arrojan cifras que oscilan entre un 2% a un 10% de probabilidad tras el diagnóstico inicial<sup>139-142</sup>. Hasta un tercio se diagnostican al mismo tiempo o en los 3 primeros meses<sup>139</sup>. La media para el desarrollo de nuevos melanomas es de 3,8 años (DS 3,6, mediana 2,8) y desciende de un 2% el primer año hasta el 1% a los 15 años<sup>143</sup>.

El riesgo de desarrollar nuevos melanomas parece incrementado en pacientes con múltiples nevus melanocíticos, nevus displásicos, antecedentes familiares de melanoma, y piel clara<sup>144</sup>.

Aunque no hay estudios que comparen el seguimiento en Atención Primaria frente a Atención Especializada en términos de supervivencia, algunos ensayos clínicos indican un alto nivel de satisfacción en los pacientes que recibían un seguimiento por su Médico de Familia<sup>145</sup>. El seguimiento en Atención Primaria de estos pacientes con una vía rápida de derivación ante sospechas de recaída o nuevos melanomas podría resultar eficiente<sup>146</sup>. Sin embargo, estos estudios fueron llevados a cabo en Reino Unido donde el acceso al dermatólogo es más complicado que en nuestro sistema sanitario y el Médico de Familia tiene mayor importancia y protagonismo en el seguimiento del paciente con cáncer de piel.

Tras 5 años de seguimiento, el riesgo de recaída y de nuevos melanomas desciende. No hay estudios que demuestren una diferencia de supervivencia entre el seguimiento en Atención Primaria o la autoexploración y el seguimiento por el dermatólogo, y la guía australiana indica un seguimiento por un dermatólogo o un médico de familia indistintamente<sup>26</sup>. En melanomas de bajo riesgo, a partir de los 5 años podría considerarse un seguimiento en Atención Primaria y un cribado anual en el servicio de Dermatología. En estadios avanzados (a partir del estadio IIB) o ante factores de riesgo de nuevos melanomas (piel clara, nevus displásicos, antecedentes familiares) el seguimiento debe ser más estrecho y debería controlarse en Dermatología hasta los 10 años, incluyendo la realización de mapas corporales cuando sea necesario, y posteriormente en Atención Primaria. Dado que muchas recidivas y nuevos melanomas son detectados por los propios pacientes, hay que hacer hincapié en la autoexploración y signos de alarma que deben hacerles consultar (nuevas lesiones, cambios en forma, tamaño o color).

**Tabla I. Pruebas complementarias basales y durante el seguimiento.**  
**Recomendaciones de las guías**

| Estadio | NCCN <sup>6</sup>                                                                                                                                | AAD <sup>7</sup>                                                                                                                                                                                                      | Alemana <sup>18</sup>                                                                                   | Australiana <sup>26</sup>                                                                        |
|---------|--------------------------------------------------------------------------------------------------------------------------------------------------|-----------------------------------------------------------------------------------------------------------------------------------------------------------------------------------------------------------------------|---------------------------------------------------------------------------------------------------------|--------------------------------------------------------------------------------------------------|
| 0       | No recomendado, salvo síntomas específicos.                                                                                                      | No recomendado, salvo síntomas específicos.                                                                                                                                                                           | No recomendado, salvo síntomas específicos.                                                             | No recomendado, salvo síntomas específicos.                                                      |
| IA      |                                                                                                                                                  |                                                                                                                                                                                                                       | Ecografía ganglionar +<br><br>Analítica con S100 basal y en seguimiento.                                |                                                                                                  |
| IB      |                                                                                                                                                  |                                                                                                                                                                                                                       |                                                                                                         |                                                                                                  |
| IIA     |                                                                                                                                                  |                                                                                                                                                                                                                       |                                                                                                         |                                                                                                  |
| IIB     |                                                                                                                                                  | Plantear pruebas de imagen conjuntamente con Oncología Médica (PET-TC, TC o RMN).<br><br>Las pruebas de imagen se pueden emplear en el seguimiento durante 3-5 años.<br><br>No se recomiendan pruebas de laboratorio. | Ecografía ganglionar + S100 + PET-TC. Basal y en seguimiento.<br><br>RMN craneal y LDH a partir de IIC. | PET-TC + RMN cerebral + S100 si adenopatías palpables.<br><br>Añadir LDH a partir de estadio IV. |
| IIC     |                                                                                                                                                  |                                                                                                                                                                                                                       |                                                                                                         |                                                                                                  |
| III     | TC toraco-abdomino-pélvico con contraste o PET-TC. RMN cerebral a partir de estadio IIC.<br><br>Niveles de LDH en estadio IV para estadificación |                                                                                                                                                                                                                       |                                                                                                         |                                                                                                  |
| IV      |                                                                                                                                                  |                                                                                                                                                                                                                       |                                                                                                         |                                                                                                  |

## BLOQUE 5. Ganglio centinela y linfadenectomía

Pregunta 11. En pacientes con un melanoma con un espesor de Breslow <0.8 mm, la realización de la biopsia del ganglio centinela (BSGC) frente a la observación ¿mejora la supervivencia global?

### Resumen de la evidencia

No existen estudios que analicen el impacto de la BSGC sobre la supervivencia global o libre de enfermedad del paciente con melanoma primario con un espesor de Breslow inferior a 0,8 mm.

Nivel de evidencia: 5

### Recomendaciones

En pacientes con melanoma primario con espesor de Breslow inferior a 0,8 mm y sin otros criterios patológicos de alto riesgo no debe recomendarse la realización de BSGC<sup>6, 7, 26, 147</sup>.

En pacientes con melanoma primario con espesor de Breslow inferior a 0,8 mm sugerimos la realización de la BSGC si además existen otros criterios patológicos de alto riesgo en el tumor primario (ulceración, alto índice mitótico (>2/mm<sup>2</sup>), invasión linfovascular, Clark IV-V)<sup>6, 7, 147</sup>.

Fuerza de la recomendación: D

### Calidad de la evidencia

A pesar de la ausencia de estudios que comparen la supervivencia de pacientes con melanoma con un espesor de Breslow inferior a 0,8 mm sometidos a BSGC o a seguimiento ecográfico, tanto la guía NCCN, como la de la *American Academy of Dermatology* recomiendan valorar la realización de BSGC en estos pacientes cuando concurren otros factores de riesgo adicionales (edad joven, ulceración, invasión linfovascular, alto índice mitótico o afectación del margen profundo de resección por el tumor)<sup>6, 7</sup>.

Los estudios disponibles sobre BSGC en pacientes con melanoma fino (Breslow <1 mm) analizaron la frecuencia de metástasis en el ganglio centinela en estos pacientes, como marcador indirecto de un posible efecto positivo sobre la supervivencia de la extirpación del ganglio. Un metaanálisis revisó la frecuencia de ganglio centinela positivo en pacientes con melanoma fino (Breslow<1 mm) en un total de 60 estudios que incluyeron 10.928 pacientes<sup>148</sup>. En este análisis, la frecuencia de metástasis en el ganglio centinela en pacientes con melanoma fino fue del 4,5%. Esta frecuencia se incrementó en aquellos pacientes con espesor de Breslow >0,75 mm, nivel de Clark IV/V, presencia de mitosis (>2/mm<sup>6</sup>), y microsatelitosis, factores que los autores plantean que pueden reforzar la recomendación de BSGC en pacientes con melanoma fino<sup>148</sup>. Sin embargo, el impacto sobre la supervivencia de la BSGC en pacientes con melanoma fino no fue analizado de forma específica en este subgrupo de pacientes.

Estos estudios, si bien no analizan el impacto de la BSGC sobre la supervivencia de los subgrupos de pacientes mencionados han servido a las diferentes guías revisadas en esta adaptación (NCCN, AAD, ASCO) para mantener la indicación de la BSGC en pacientes con melanoma fino en base a consensos de expertos.

Pregunta 12. En pacientes con ganglio centinela positivo, la realización de una linfadenectomía del área de drenaje linfático frente al seguimiento del paciente con ecografías periódicas ¿mejora la supervivencia global?

### Resumen de la evidencia

El impacto de la disección ganglionar inmediata, en pacientes con metástasis en la BSGC, ha sido estudiado en 2 ensayos clínicos, el *Multicenter Selective Lymphadenectomy Trial-II*<sup>124</sup> y el DeCOG-SLT<sup>125</sup>, que no han demostrado que la disección ganglionar del paciente con BSGC positiva mejore la supervivencia frente al seguimiento periódico mediante ecografía ganglionar y disección completa en el momento en que se identifica alguna metástasis ganglionar. En estos estudios se ha descrito una mayor frecuencia de secuelas, principalmente linfedema, en los grupos de pacientes sometidos a disección inmediata frente a los pacientes sometidos a observación ecográfica posterior a una BSGC positiva.

Además, ambos ensayos han demostrado que entre el 75% al 88% de las disecciones inmediatas que se realizan no identifican metástasis ganglionares adicionales<sup>124, 125</sup>.

Nivel de evidencia: 1b.

### Recomendaciones

En aquellos pacientes con metástasis de bajo riesgo (carga tumoral en el ganglio centinela inferior o igual a 1 mm) recomendamos substituir la disección ganglionar inmediata por el seguimiento ecográfico de la región ganglionar afectada y disección diferida al momento en que se detecte una metástasis<sup>124, 125</sup>.

Fuerza de la recomendación: A

### Calidad de la evidencia

La guía NCCN hace referencia a los resultados del MSLT-II y DeCOG para resaltar que ninguno de

los dos estudios ha demostrado mejorar la supervivencia por melanoma de los pacientes sometidos a disección ganglionar inmediata, comparados con aquellos que fueron sometidos a seguimiento ecográfico<sup>124, 125</sup>. No obstante, la última versión de esta guía mantiene la recomendación de seguimiento ecográfico o disección ganglionar inmediata en pacientes con metástasis en el ganglio centinela, en función de factores adicionales que ayuden a predecir la presencia de metástasis de ganglios no centinela (carga tumoral número de ganglios centinela positivos, espesor de Breslow y ulceración del tumor primario)<sup>6</sup>. De la misma forma, las recomendaciones de la *American Academy of Dermatology* insisten en la discusión multidisciplinar sobre la indicación de disección ganglionar o seguimiento ecográfico en estos pacientes<sup>7</sup>.

La recomendación de substituir la disección ganglionar completa en pacientes con metástasis en el ganglio centinela por el seguimiento ecográfico estrecho alcanza su mayor robustez para aquellos subgrupos de pacientes mejor representados en dichos ensayos: pacientes con carga tumoral en el ganglio centinela inferior a 1 mm<sup>124, 125</sup>. Sin embargo, la baja proporción de pacientes con carga tumoral superior a 1 mm en el MSLT-II y DeCOG-SLT, 35% y 25%, respectivamente no permitió alcanzar la potencia estadística necesaria para emitir recomendaciones definitivas sobre el abandono de la disección ganglionar inmediata en pacientes con carga tumoral superior a 1 mm<sup>124, 125</sup>. La carga tumoral en el ganglio centinela ha sido identificada, en otros estudios, como factor predictor independiente de supervivencia libre de recurrencia y supervivencia por melanoma<sup>149</sup>. No obstante, en el MSLT-II, el diámetro tumoral superior a 1 mm no fue identificado como predictor independiente de supervivencia, como tampoco lo fue el número de ganglios centinela metastásicos (N)<sup>124</sup>.

Por ello, en estos pacientes la decisión sobre disección inmediata o seguimiento ecográfico requiere de una discusión exhaustiva sobre los riesgos potenciales y beneficios de la disección ganglionar completa<sup>6, 7, 147</sup>.

En cuanto a la morbilidad quirúrgica asociada a la disección ganglionar, el MSLT-II demostró una menor frecuencia de complicaciones, principalmente linfedema, en el grupo de pacientes sometidos a seguimiento ecográfico y disección diferida, frente al grupo de pacientes sometidos a disección inmediata (6,3% vs 24,1%,  $p < 0,001$ )<sup>124</sup>. Esta menor frecuencia de complicaciones en el grupo de observación se relaciona principalmente con la reducción en el número de disecciones llevadas a cabo en este grupo. Además, las disecciones diferidas en pacientes que han sido seguidos ecográficamente podrían asociarse a una menor morbilidad debido a la menor

carga tumoral, y menor alteración del drenaje linfático, con la que se diagnostica y trata la enfermedad regional<sup>124</sup>.

Pregunta 13. En pacientes con afectación metastásica ganglionar, la información patológica sobre el número de ganglios afectados, tamaño del depósito metastásico y localización de la metástasis en el ganglio ¿ofrece información pronóstica relevante y debería recogerse en el informe histológico?

### Resumen de la evidencia

En pacientes con metástasis ganglionar de melanoma la carga tumoral en los ganglios ha sido identificada como un factor predictor de supervivencia libre de recurrencia y supervivencia específica por melanoma. En este sentido, la última edición de la clasificación TNM de la *American Joint Committee on Cancer* mantiene la afectación ganglionar (N) como un componente fundamental en la estadificación y pronóstico de estos pacientes<sup>150</sup>.

Otros factores patológicos, como la afectación ganglionar extracapsular, continúan siendo de interés para la toma de decisiones en cuanto a la necesidad de radioterapia adyuvante<sup>6</sup>.

Nivel de evidencia: 2a.

### Recomendaciones

En pacientes sometidos a BSGC, recomendamos que el informe anatomopatológico describa la región ganglionar intervenida, el número de ganglios metastásicos, el número de ganglios no metastásicos, las dimensiones máximas del implante tumoral en el ganglio (medida en mm), la localización de la metástasis en el ganglio linfático, y la presencia de extensión extracapsular. El informe anatomopatológico debe diferenciar con claridad los ganglios centinela de los ganglios secundarios o no centinela, en el caso de que se extraigan.

En pacientes sometidos a disección ganglionar, recomendamos que el informe anatomopatológico incluya la región ganglionar intervenida, el número de ganglios metastásicos, el número de ganglios no metastásicos, presencia de conglomerado metastásico y presencia de afectación extracapsular.

Fuerza de la recomendación: B

## Calidad de la evidencia

Las guías NCCN y de la *German Society of Dermatology y Dermatologic Cooperative Oncology Group* coinciden en el interés pronóstico de la carga tumoral del ganglio centinela, por lo que recomiendan la inclusión de esta información en el informe anatomopatológico del paciente con metástasis ganglionar<sup>6, 18</sup>.

Esta recomendación se basa en los numerosos estudios que han analizado el impacto de la carga tumoral del ganglio linfático (microscópica vs macroscópica, número de ganglios, etc.) sobre la supervivencia libre de enfermedad y global del paciente con melanoma<sup>149, 151-153</sup>. Estos estudios se han basado principalmente en bases de datos unicéntricas y multicéntricas, en general con amplios tamaños muestrales.

La clasificación de la *American Joint Committee on Cancer*, en su edición de 2017, incluyó los siguientes criterios relacionados con la afectación ganglionar para la definición del estadio “N”: número de ganglios metastásicos, metástasis clínicamente oculta (identificada mediante BSGC) o clínicamente detectada (mediante exploración física o estudios de imagen) y presencia de conglomerado adenopático<sup>150</sup>. En cuanto a la carga tumoral, la supervivencia específica por melanoma a los 10 años oscila entre el 75% en pacientes con un solo ganglio linfático (N1) hasta el 47% en pacientes con 4 o más ganglios metastásicos (N3)<sup>150</sup>. La dimensión máxima del implante metastásico como medida de la carga tumoral, se asoció con una supervivencia específica por melanoma a los 10 años del 96% para micrometástasis inferiores a 0,2 mm, del 89% para metástasis de entre 1,0 y 2,0 mm, y del 64% en pacientes con metástasis superiores a 4,0 mm<sup>150</sup>. Igualmente, la presencia de al menos dos ganglios adheridos formando un conglomerado clasifica el estatus ganglionar en un estadio N3b, con una supervivencia específica del 57% a los 10 años<sup>150</sup>.

Finalmente, los ensayos clínicos sobre inmunoterapia adyuvante han demostrado beneficio terapéutico en pacientes con enfermedad ganglionar clínicamente evidente (estadios IIIB/IIIC), y en pacientes con enfermedad clínicamente oculta (estadio IIIA) con carga tumoral en el ganglio centinela superior a 1 mm<sup>154</sup>. Por todo esto, los hallazgos patológicos observados en la metástasis ganglionar, particularmente la carga tumoral, representan en la actualidad un factor crítico también para la toma de decisiones terapéuticas<sup>6, 147</sup>.

Pregunta 14. En pacientes con enfermedad cutánea regional (satelitosis, metástasis en tránsito) en el momento del diagnóstico o durante el seguimiento, la realización de la biopsia del ganglio centinela frente a observación, ¿mejora la supervivencia global?

### Resumen de la evidencia

No existen estudios que demuestren beneficio sobre la supervivencia global ni sobre el control regional de la enfermedad mediante la realización de BSGC en pacientes con melanoma y presencia de satelitosis o enfermedad en tránsito.

La BSGC en este contexto ofrece una posible re-estadificación del paciente, con un valor pronóstico, pero sin repercusión terapéutica.

Nivel de evidencia: 5.

### Recomendaciones

En pacientes con satelitosis o enfermedad en tránsito resecables no recomendamos de forma rutinaria la realización de BSGC, porque no mejora la supervivencia del paciente ni modifica la decisión terapéutica en la mayoría de los pacientes.

Fuerza de la recomendación: D

### Calidad de la evidencia

La versión más reciente de la guía de la NCCN propone que se puede considerar la BSGC en pacientes en estadio III con enfermedad en tránsito resecable y en los que el resultado de la BSGC modifique la actitud terapéutica. Sin embargo, esta guía acepta que el impacto de esta intervención sobre la supervivencia del paciente es incierto en este escenario clínico<sup>6</sup>. De la misma forma, la guía del *Cancer Council Australia* plantea que la BSGC aporta información pronóstica de interés y debería ser realizada en pacientes con tránsito resecable. Sin embargo, esta guía tampoco aporta evidencia del beneficio de esta intervención sobre la supervivencia

del paciente en esta situación clínica<sup>26</sup>.

Existen escasos estudios que analicen el papel de la BSGC en pacientes con enfermedad regionalmente avanzada (satelitosis y/o enfermedad en tránsito). Un estudio multicéntrico que analizó el papel de la BSGC en 107 pacientes con melanoma y recaída local o en tránsito observó una frecuencia de BSGC positiva del 40%, con una frecuencia de metástasis de ganglios no centinela del 37%<sup>155</sup>. Debido a esta elevada frecuencia de metástasis de ganglios no centinela, los autores plantearon que debería continuar ofreciéndose la disección ganglionar inmediata en pacientes con recaída local o en tránsito<sup>155</sup>. No obstante, estos autores no encontraron un beneficio de supervivencia libre de progresión ni en la supervivencia global estadísticamente significativo en función del resultado de la BSGC (positiva o negativa)<sup>155</sup>.

Desde el punto de vista de información pronóstica, la positividad de la BSGC en un paciente con microsatélites o enfermedad en tránsito podría modificar el estadio N desde un estadio N1c (BSGC negativa) con una supervivencia específica del 75% a los 10 años, a un estadio N2c o N3c, con una supervivencia de 59% y 43% respectivamente<sup>150</sup>. El estadio clínico final se mantendría en un estadio IIIB o IIIC, con una supervivencia a los 10 años del 77% y 60%, respectivamente, y solo alcanzaría el estadio IIID, con una supervivencia del 24% a los 10 años, en presencia de tumores primarios de mal pronóstico (T4b)<sup>150</sup>.

Desde el punto de vista de la decisión sobre terapia adyuvante, la presencia de microsatélites o metástasis en tránsito resecaadas representa una indicación para la inmunoterapia o terapia diana adyuvante, independientemente del resultado de la BSGC, según recomienda la guía clínica de la NCCN<sup>6</sup>. No obstante, esta misma guía recomienda realizar BSGC en estos pacientes si se considera que el resultado de la misma pueda modificar el plan terapéutico<sup>6</sup>.

Por otra parte, los resultados del MSLT-II respaldan el abandono de la disección ganglionar inmediata en pacientes con BSGC positiva, por lo que incluso en aquellos pacientes con resultado positivo, la realización de la BSGC no modificaría la actitud terapéutica en este caso en relación con la disección ganglionar<sup>124</sup>.

## BLOQUE 6. Tratamiento adyuvante.

Pregunta 15. En pacientes con melanoma de alto riesgo (estadios IIB, IIC ó III/IV tras exéresis de metástasis y ausencia de enfermedad objetivable), la administración de tratamiento adyuvante con interferón a dosis altas, ¿mejora la supervivencia global?

### Resumen de la evidencia

Un meta-análisis a partir de 17 ensayos clínicos publicados con el interferón- $\alpha$  en adyuvancia en pacientes con melanoma en estadio II y III ha demostrado un aumento en la supervivencia global (SG) frente a la observación (HR = 0,91, 95% IC: 0,85-0,97, p = 0,003; número necesario para tratar (NNT): 35 pacientes, 95% CI: 21 a 108, para prevenir 1 muerte en 5 años)<sup>156</sup>. Sin embargo, la mejoría en la SG no se ha podido confirmar en todos los estudios y el tratamiento con interferón lleva asociado una considerable toxicidad.

Nivel de evidencia: 1b.

### Recomendaciones

Considerando la eficacia que han demostrado los inhibidores de los puntos de control inmunitario (IPI) y los inhibidores de BRAF más MEK en los ensayos clínicos publicados en el tratamiento adyuvante del melanoma, sugerimos no considerar el interferón- $\alpha$  como una alternativa en este ámbito.

Fuerza de la recomendación: D

### Calidad de la evidencia:

La evidencia sobre el interferón- $\alpha$  se basa en lo recogido en las últimas versiones publicadas de las guías europea, alemana y, sobre todo por encontrarse más actualizada, de la australiana<sup>18, 26, 157</sup>. En la guía de la Academia Americana de Dermatología no se incluyó como uno de los objetivos la revisión del tratamiento sistémico del melanoma<sup>7</sup>, y tanto en el NICE como en la guía de la NCCN ya no se incluye al interferón- $\alpha$  entre los tratamientos adyuvantes

recomendables, dada la efectividad que han demostrado en este ámbito los tratamientos anti-diana y los IPI <sup>6, 158</sup>

El interferón- $\alpha$  ha mostrado en diferentes ensayos una mejoría en la SLE, que no siempre se acompañaba de una mejoría de la supervivencia global<sup>159, 160</sup>.

Un meta-análisis a partir de 17 ensayos clínicos publicados con el interferón- $\alpha$  en adyuvancia encontró un aumento estadísticamente significativo de supervivencia libre de enfermedad (HR = 0.83,  $p < 0.00001$ ), y un aumento menor, pero con significación estadística, de la supervivencia global (HR = 0.91, 95% IC: 0.85-0.97;  $p = 0.003$ ; número necesario para tratar (NNT): 35 pacientes, 95% CI: 21 a 108, para prevenir 1 muerte en 5 años) <sup>156</sup>. Aunque los ensayos que demostraron diferencias más evidentes eran los que utilizaban dosis altas de interferón- $\alpha$ , en este metaanálisis no se demostró que la eficacia del interferón- $\alpha$  se encontrase relacionada con la dosis ni con la duración del tratamiento.

Respecto a la selección de los mejores candidatos para el tratamiento adyuvante con interferón- $\alpha$ , un estudio retrospectivo a partir de los resultados de 2 ensayos clínicos encontró que los pacientes cuyo melanoma primario se encontraba ulcerado eran los que obtenían mayor beneficio, aunque este análisis de subgrupos a posteriori tiene escasa validez <sup>161</sup>.

El tratamiento con interferón- $\alpha$  se acompaña de una considerable toxicidad, más importante cuando se utilizan regímenes de dosis altas (toxicidad grado 3/4 en orden decreciente de frecuencia: mielosupresión (26-60%), elevación de transaminasas (14-29%), fiebre (18%), fatiga (18%), mialgias (4-17%), náuseas (5-9%), vómitos (5%), sintomatología neuropsiquiátrica (2-10%) <sup>162</sup>. Este aspecto debe comentarse detenidamente con cada paciente, estableciendo un balance con la discreta mejoría que se puede alcanzar en la supervivencia global.

Aunque no existen ensayos clínicos publicados que comparen directamente el interferón- $\alpha$  con los IPI o con los fármacos anti-diana en el tratamiento adyuvante del melanoma, dada la mayor eficacia y menor toxicidad que han demostrado estos nuevos fármacos, el interferón- $\alpha$  no se considera actualmente como una alternativa recomendable para el tratamiento adyuvante del melanoma. La Guía Australiana contempla como único escenario para considerar la administración del interferón- $\alpha$  en adyuvancia aquellos ámbitos o circunstancias en los que no se disponga de los tratamientos previamente mencionados y en pacientes muy seleccionados, tras haber comentado con ellos los potenciales beneficios y la toxicidad del tratamiento<sup>26</sup>.

Pregunta 16. En pacientes con melanomas de alto riesgo (estadios IIB, IIC ó III/IV tras exéresis de metástasis y ausencia de enfermedad objetivable), el tratamiento adyuvante con inhibidores de los puntos de control inmunitarios (IPI) (anti-CTLA4, anti-PD1) frente a la observación, ¿mejora la supervivencia global?

## Resumen de la evidencia

Ipilimumab a dosis altas\* ha demostrado una mejoría en la supervivencia global frente a placebo (a 5 años: 65% vs. 54%, HR = 0,72 [0,58–0,88], p = 0,001) en pacientes en estadios IIIA >1 mm, IIIB/C, sin enfermedad en tránsito (basado en criterios de la 7ª edición de la clasificación del melanoma AJCC) <sup>163</sup>.

\*Dosis: 10mg/kg, cada 3 semanas, 4 dosis, seguido de una dosis de mantenimiento cada 3 meses hasta un máximo de 3 años)

Los ensayos realizados hasta el momento con fármacos anti-PD-1, nivolumab y pembrolizumab, en adyuvancia, han demostrado una mejoría estadísticamente significativa de la supervivencia libre de enfermedad frente a ipilimumab y frente a placebo, respectivamente. Los efectos secundarios severos aparecieron con menor frecuencia con nivolumab. No se han publicado los datos de supervivencia global, aunque este no era un objetivo principal del ensayo. <sup>154, 164</sup>

Nivel de evidencia: 1b.

## Recomendaciones

No existen por el momento datos que demuestren una ventaja en la supervivencia global con el tratamiento adyuvante con fármacos anti-PD-1, aunque probablemente, como se ha comentado en los ensayos pivotaes, se precise de un mayor tiempo de seguimiento para determinar este aspecto <sup>154, 164</sup>. A pesar de ello, la mejor supervivencia libre de enfermedad, junto con la menor toxicidad frente a ipilimumab, permite recomendar a los fármacos anti-PD-1 como tratamiento

adyuvante del melanoma cuando se opte por fármacos IPI. Nivolumab y pembrolizumab se consideran opciones adecuadas para el tratamiento adyuvante del melanoma con afectación ganglionar <sup>6, 26</sup>. La evidencia sería de nivel 1 y la fuerza de la recomendación A para los estadios IIIB y IIIC, tanto con nivolumab como con pembrolizumab <sup>6, 26</sup>. La recomendación sería la misma para los pacientes con estadio IIIA con metástasis ganglionares >1 mm (incluidos en el ensayo de pembrolizumab, KEYNOTE-054<sup>154</sup>), y aquellos con metástasis a distancia (estadio IV), siempre que se haya realizado una resección con márgenes libres (incluidos en el ensayo de nivolumab Chek Mate 238<sup>164</sup>)<sup>6, 26</sup>. A estos podría sumarse, con un nivel de evidencia menor y una fuerza de recomendación menor, los pacientes con enfermedad en tránsito extirpable.

Fuerza de la recomendación: A

### Calidad de la evidencia

Tal y como se recoge en las guías en las que el tratamiento adyuvante se encuentra más actualizado (NCCN, Guía Australiana, NICE), los fármacos IPI que se recomiendan para la adyuvancia son los anti-PD-1, nivolumab y pembrolizumab, no existiendo un criterio que permita preferir uno sobre otro excepto pequeñas diferencias en los pacientes que se incluyeron en los ensayos pivotaes en los que se basan las recomendaciones para su empleo <sup>6, 26, 158</sup>. Tanto nivolumab como pembrolizumab tienen nivel de evidencia 1 para el tratamiento adyuvante en pacientes en estadios IIIB y IIIC por las ventajas que han demostrado en la SLE: nivolumab frente a ipilimumab a 1 año: 71% vs. 61%, HR = 0.65 (0.51–0.83),  $p < 0.001$ ; pembrolizumab frente a placebo a 1 año: 75% vs. 61%, HR = 0.57 (0.43–0.74),  $p < 0.001$  <sup>154, 164</sup>. El ensayo Checkmate 238 en el que se basan los datos de nivolumab excluyó al estadio IIIA (según la 7ª edición de la AJCC) <sup>164, 165</sup>. La guía NCCN al comentar este ensayo recomienda nivolumab con un elevado nivel de evidencia para pacientes con afectación ganglionar clínicamente detectable, los cuales están incluidos en los estadios IIIB y IIIC. Sin embargo, dado que los pacientes en estadio IIIA no se incluyeron en este ensayo, su recomendación es menos firme al extender el tratamiento adyuvante con nivolumab a pacientes con afectación ganglionar detectada al realizar el ganglio centinela<sup>6</sup>. Resulta importante considerar que en la categoría IIIB de la 7ª edición de la AJCC se recogía a un grupo importante de pacientes con afectación ganglionar microscópica (todos los T1b–T4b con N1a ó N2a) <sup>165</sup>. De hecho, en el ensayo de nivolumab referido, 259 de un total de 906 pacientes (28.6%) tenían afectación ganglionar microscópica <sup>164</sup>. Debemos ser cautos al analizar los pacientes incluidos en estos

ensayos, ya que se ceñían a una clasificación previa de los melanomas, y recordar que en la 8ª y vigente edición de la clasificación de la AJCC para el melanoma, los subgrupos de afectación ganglionar N no se corresponden de manera exacta con los de la 7ª edición<sup>150, 165</sup>.

Respecto a pembrolizumab, y considerando los pacientes incluidos en el ensayo KEYNOTE-054, la situación es similar, aunque en este ensayo sí que se incluyeron pacientes en estadio IIIA, siempre que las metástasis fueran  $\geq 1$  mm<sup>154</sup>. Por tanto, el nivel de evidencia de pembrolizumab como tratamiento adyuvante es 1 en pacientes en estadio IIIB, IIIC y en IIIA con metástasis ganglionares  $\geq 1$  mm.

Además de los escenarios descritos, nivolumab tendría un nivel de evidencia menor para el tratamiento adyuvante de pacientes con satelitosis o enfermedad en tránsito resecada con márgenes libres. Esta menor certeza se justifica por el hecho de que, aunque este grupo de pacientes fue incluido en el ensayo Checkmate 238, sus resultados no fueron comunicados de forma separada<sup>164</sup>. Los pacientes con enfermedad en estadio IV con metástasis resecaas también fueron incluidos en este ensayo, y demostraron una ventaja en la SLE cuando recibieron tratamiento adyuvante con nivolumab, por lo que el nivel de evidencia en este grupo es de 1.

Si, como es lógico, se prescinde de diferencias que parecen menores en los grupos de pacientes que se incluyeron en los ensayos mencionados de nivolumab y pembrolizumab en adyuvancia, parecería adecuado recomendar ambos fármacos para el tratamiento adyuvante de melanomas en estadio IIIB y IIIC de la 7ª edición de la AJCC, extendiéndolo a pacientes en estadio IIIA con depósitos tumorales en los ganglios  $\geq 1$  mm. Lo cual podría resumirse como pacientes que se presentan o recurren con enfermedad ganglionar clínicamente objetivable, o con afectación ganglionar detectada al realizar el ganglio centinela con metástasis  $\geq 1$  mm. En los pacientes con metástasis en tránsito o metástasis a distancia, resecaas con márgenes libres, también se debe considerar la adyuvancia con fármacos anti-PD-1.

La toxicidad del régimen con dosis altas de ipilimumab que se utilizó en el ensayo clínico EORTC 18071 del cual se desprenden los datos de SG mencionados (5 muertes y 53% de abandonos de tratamiento debido a los efectos adversos del tratamiento)<sup>163</sup>, así como las importantes mejorías encontradas en SLE en los ensayos con fármacos anti-PD-1 en adyuvancia, junto con su significativa menor toxicidad<sup>154, 164</sup>, justifican que en la actualidad ipilimumab no esté indicado como tratamiento adyuvante<sup>6</sup>.

Pregunta 17. En pacientes con melanomas de alto riesgo (estadios IIB, IIC o III/IV tras exéresis de metástasis y ausencia de enfermedad objetivable), el tratamiento adyuvante con terapias dirigidas anti-BRAF frente a la observación, ¿mejora la supervivencia global?

### Resumen de la evidencia

El tratamiento combinado con los inhibidores de BRAF y MEK, dabrafenib y trametinib, ha demostrado un aumento en la SG frente a placebo en pacientes con melanoma con mutación BRAF V600E o V600K en estadio IIIA con metástasis > 1 mm, IIIB y IIIC. Con una mediana de seguimiento de 2,8 años, el porcentaje de supervivencia global a 3 años fue del 86% en el grupo con tratamiento combinado y del 77% en el grupo placebo (HR = 0,57; IC 95%: 0,42 - 0,79, p = 0,0006) <sup>166</sup>. Sin embargo, esta diferencia no fue significativa al no alcanzar el límite estadístico preespecificado de p = 0,000019.

Nivel de evidencia: 1b.

### Recomendaciones

Tomando como referencia los grupos de pacientes incluidos en el ensayo COMBI-AD del que derivan los datos sobre dabrafenib/trametinib en adyuvancia, la recomendación de la AEDV sería considerar este tratamiento para todos aquellos melanomas con la mutación BRAF V600 que se encuentran en el momento del diagnóstico o tras recurrencia en estadio III<sup>166</sup>. Aunque en el ensayo del que se desprenden estos resultados solo se incluyeron pacientes con metástasis ganglionares mayores de 1 mm, este tratamiento se ha hecho extensivo a metástasis ganglionares de cualquier tamaño. Así mismo, esta recomendación podría extenderse a los pacientes con metástasis en tránsito completamente extirpadas.

Fuerza de la recomendación: A

## Calidad de la evidencia

En el ensayo aleatorizado COMBI-AD se incluyó a pacientes con melanoma que tuviesen las mutaciones V600E ó V600K, en estadio IIIA (con metástasis ganglionares >1 mm), IIIB o IIIC, y se les administró tratamiento combinado con dabrafenib (150mg via oral, 2 veces al día) y trametinib (2mg via oral, 1 vez/día) (inhibidores respectivamente de BRAF y MEK) o placebo<sup>166</sup>. Los criterios en los que se basa la agrupación en estadios de los pacientes son los de la 7ª edición de la clasificación de la AJCC. Los resultados de este ensayo mostraron un aumento estadísticamente significativo con la combinación dabrafenib/trametinib en la SLE (a 4 años: 54% vs. 38%; HR = 0,49 [0,40–0,59];  $p < 0,001$ )<sup>167</sup>. La ventaja de este tratamiento frente a placebo se mantuvo con independencia del subgrupo del estadio III en el que el paciente se encontrara, o la existencia o no de ulceración en el tumor primario. Respecto al tipo de mutación (V600E y V600K), aunque ambos tipos se beneficiaron, la HR fue discretamente mejor para la V600E que para la V600K [0.48 (0.39–0.58) vs 0.54 (0.27–1.06)]. Estos datos otorgan una evidencia 1b al tratamiento adyuvante con la combinación dabrafenib/trametinib en cuanto a mejoría en SLE. Aunque no se alcanzó la significación estadística requerida para la SG en el primer análisis intermedio, este estudio prevé analizar este punto en un análisis final con mayor seguimiento de los pacientes. En base a esto, las guías en las que el tratamiento adyuvante se encuentra actualizado recomiendan considerar el tratamiento con dabrafenib y trametinib en pacientes con melanoma resecado en estadio III cuando el tumor tenga la mutación BRAF V600<sup>6, 26, 158</sup>.

Aunque en este ensayo se incluyeron pacientes con metástasis en tránsito, los resultados no se comunicaron de forma separada en este grupo, por lo que la certeza en esta situación es menor. El ensayo no incluyó a pacientes con enfermedad a distancia por lo que no existe evidencia de la eficacia como tratamiento adyuvante de esta combinación de fármacos en pacientes con enfermedad en estadio IV resecada.

Existe un estudio, BRIM8, que demostró una ventaja de vemurafenib en adyuvancia en la SLE de pacientes con melanoma en estadios IIC-III<sup>168</sup>. Sin embargo, la mayor toxicidad de este tratamiento, principalmente por la aparición de neoplasias hiperproliferativas cutáneas frente a la combinación dabrafenib/trametinib, ha condicionado que tanto la guía del NCCN, la Australiana y el NICE no consideren el tratamiento adyuvante con vemurafenib en monoterapia.

Pregunta 18. En pacientes a los que se les ha realizado una linfadenectomía terapéutica y tienen un alto riesgo de recidiva local (invasión extracapsular, o  $\geq 2$ -4 ganglios según área o  $\geq 3$ -4 cm de diámetro mayor ganglionar según área), la administración de radioterapia adyuvante frente a la observación, ¿mejora la supervivencia global?

### Resumen de la evidencia

En pacientes con melanoma y metástasis ganglionares en los que se ha realizado un vaciamiento ganglionar pero se considera que presentan un alto riesgo de recurrencia ganglionar ( $\geq 1$  ganglio parotídeo,  $\geq 2$  ganglios cervicales o axilares,  $\geq 3$  ganglios inguinales;  $\geq 3$  cm en los ganglios cervicales,  $\geq 4$  cm en los ganglios axilares o inguinales, o evidencia de extensión extracapsular), la radioterapia adyuvante de la cuenca de drenaje linfático no mejora la supervivencia global de los pacientes, aunque sí consigue una mejoría en el control local de la enfermedad (disminución estadísticamente significativa de las recurrencias ganglionares)<sup>169</sup>. Esta conclusión se basa en un estudio previo al empleo de la adyuvancia actual, por lo que podría ser modificada con el uso de esta.

Nivel de evidencia: 1b.

### Recomendaciones

En pacientes con melanoma y metástasis ganglionares, que reúnan criterios de alto riesgo de recurrencia ganglionar tras la cirugía, sugerimos que la radioterapia adyuvante podría considerarse como una opción al haberse demostrado que consigue una mejoría en el control local de la enfermedad<sup>169</sup>. En todos los casos debe valorarse la morbilidad asociada a la radioterapia, principalmente en términos de fibrosis y edema de miembros, más importante en el caso de las extremidades inferiores cuando se administra radioterapia en la zona de la ingle<sup>6</sup>.

18, 26.

Fuerza de la recomendación: A

## Calidad de la evidencia

Existe un ensayo clínico aleatorizado en el que se seleccionaron pacientes con melanoma con alto riesgo de recurrencia ganglionar, y se comparó la disección ganglionar regional con el mismo tipo de cirugía seguida de radioterapia en la cuenca de drenaje linfático <sup>169</sup>. Los parámetros para considerar a un paciente de alto riesgo fueron el número de ganglios afectados, el tamaño de los ganglios y la existencia de afectación extracapsular. El número y el tamaño de los ganglios afectados para considerar a un paciente de alto riesgo se consideró diferente según la cuenca ganglionar:  $\geq 1$  ganglio parotídeo,  $\geq 2$  ganglios cervicales o axilares,  $\geq 3$  ganglios inguinales;  $\geq 3$  cm en los ganglios cervicales,  $\geq 4$  cm en los ganglios axilares o inguinales. La radioterapia adyuvante en estos casos no consiguió mejorar la supervivencia global ni la libre de enfermedad, aunque sí se demostró una disminución estadísticamente significativa de las recurrencias ganglionares en la cuenca de drenaje linfático (en el análisis a 5 años la incidencia acumulada de recaída aislada en la cuenca ganglionar como lugar de primera recaída fue del 8,3% en el grupo que recibió radioterapia adyuvante y del 23% en el que fue tratado solo con cirugía,  $p = 0,002$ ). Por lo tanto, a partir de los resultados de este ensayo, se puede concluir que, en pacientes con alto riesgo de recurrencia ganglionar, la radioterapia adyuvante de la cuenca de drenaje ganglionar permite mejorar el control local de los ganglios, pero no mejora la supervivencia específica por melanoma.

Sin embargo, la radioterapia se asoció con un aumento significativo de las complicaciones, principalmente fibrosis y edema de miembros. El aumento de volumen como complicación a largo plazo de la radioterapia se observó como una complicación especialmente frecuente en las extremidades inferiores. En un periodo de seguimiento de 5 años, en los pacientes que recibieron radioterapia en la ingle tras cirugía se documentó un aumento en el volumen de la extremidad inferior significativamente mayor que en los pacientes que solo fueron tratados con cirugía (15,0% vs 7,7%; diferencia del 7,3%, IC 95%: 1,5-13,1;  $p=0,014$ ). Sin embargo, tras la radioterapia de axila, la diferencia de volumen en el miembro superior fue pequeña y no significativamente diferente (10,5% vs 7,0%; diferencia del 3,4%; IC 95%: -3,0-9,3;  $p=0,25$ ) <sup>169</sup>.

En el momento de la publicación del ensayo del que se desprenden los resultados que hemos comentado, 2015<sup>169</sup>, no se disponía de los tratamientos de adyuvancia que se emplean en la actualidad, y además la radioterapia fue un criterio de exclusión en los ensayos clínicos sobre dichos tratamientos adyuvantes. Por ello, la radioterapia adyuvante sobre la zona ganglionar,

aun en las condiciones de alto riesgo mencionadas, resulta hoy en día controvertida y su papel probablemente se aclarará en ensayos futuros que la contemplen junto con la adyuvancia actual.

## BLOQUE 7. Tratamiento de la enfermedad locorregional y tratamiento quirúrgico de la enfermedad diseminada regional y/o a distancia.

Pregunta 19. En pacientes con enfermedad diseminada regional (satelitosis, metástasis en tránsito) el tratamiento con cirugía, perfusión aislada de miembro, electroquimioterapia, radioterapia, IL2 intralesional, imiquimod, terapia de virus oncolíticos, rosa bengala o tratamiento sistémico frente a observación, ¿mejora la supervivencia global? ¿mejora la calidad de vida del paciente?

### **Resumen de la evidencia**

Ninguna opción terapéutica local ha demostrado mejorar la supervivencia global de los pacientes con melanoma. Tampoco existen evidencias que hayan evaluado la calidad de vida de los pacientes. En general, se prefiere la extirpación de las lesiones de metástasis en tránsito o satelitosis cuando esto es posible. Además, pueden ser tratadas con una gran variedad de posibilidades terapéuticas.

Nivel de evidencia: 2b.

### **Recomendaciones**

En presencia de satelitosis o metástasis en tránsito, recomendamos extirparlas con márgenes libres cuando sea posible. En caso contrario, existen diversas técnicas a tener en cuenta en el tratamiento, como la perfusión de miembro aislado, el tratamiento intralesional (interleukina 2, BCG, rosa de Bengala, T-VEC), la inmunoterapia local tópica (imiquimod, difenciprona), radioterapia, ablación local (láser CO2), electroquimioterapia o crioterapia. En presencia de múltiples lesiones se pueden considerar las terapias sistémicas.

Fuerza de la recomendación: B

## Calidad de la evidencia

No existen evidencias de que ninguna modalidad terapéutica para tratar las satelitosis o metástasis en tránsito mejore la supervivencia global. En general, se sigue el principio de escisión completa de las metástasis en tránsito cuando sea posible<sup>18, 26, 157</sup>.

Cuando por el número y/o volumen de satelitosis o metástasis en tránsito, éstas no son abordables quirúrgicamente, se prefiere el tratamiento quimioterápico regional en base a la mayor evidencia. En este sentido la perfusión regional del miembro con melfalán es el tratamiento estándar consiguiendo un 20% de respuestas completas con un 50% de respuestas globales. La adición de TNF-alfa no aporta beneficio en la supervivencia aumentando la toxicidad<sup>170</sup>.

La infiltración de las metástasis con Talimogén laherpaprepvec (T-VEC), virus del herpes tipo 1 atenuado, ha demostrado en un ensayo clínico aumentar las tasas de respuestas duraderas (definida por la tasa de respuestas completas más respuestas parciales con una duración mayor o igual a 6 meses) frente a la administración de factor estimulante de colonias granulocíticas y macrófagos (GM-CSF) (n=295 vs n=141) (16,3% vs. 2,1%) mientras que la tasa de respuesta global también fue superior (26,4% vs. 5,7%). En cuanto a la supervivencia global, los pacientes a los que se sometieron a tratamiento con T-VEC tuvieron un 21% de reducción del riesgo de morir frente al brazo de pacientes tratados con GM-CSF (189 vs 101 eventos) (HR, 0,79; 95% CI, 0,62 - 1,00; p = 0,051) aunque no alcanzó la significación estadística<sup>171</sup>.

El tratamiento con láser CO2 ha mostrado en series cortas retrospectivas poder tratar un gran número de lesiones con muy baja morbilidad<sup>172, 173</sup>. Hoy en día ha sido sustituido por otras opciones, como la inyección intralesional con BCG, interleuquina-2, interferón alfa, imiquimod (con o sin crioterapia), rosa de bengala, difenciprona tópica, infusión de miembro aislado, electroquimioterapia o radioterapia, no sustentadas en ensayos clínicos.

Pregunta 20. En pacientes con melanomas en estadios III o IV, la extirpación de las metástasis ¿Mejora la supervivencia global? ¿Mejora la calidad de vida del paciente?

### Resumen de la evidencia

En general existe consenso en la extirpación linfática radical en caso de aparición de metástasis en la cadena ganglionar para un control regional de la enfermedad y con una intención curativa. De igual forma, en presencia de metástasis aisladas u oligometástasis, se prefiere la excisión quirúrgica de las mismas frente a la observación.

Nivel de evidencia: 4.

### Recomendaciones

En presencia de metástasis linfáticas o viscerales, incluidas las metástasis cerebrales, recomendamos considerar su extirpación en caso de que sean únicas o varias, siempre que sean accesibles quirúrgicamente.

Fuerza de la recomendación: C

### Calidad de la evidencia

Existe un consenso general para la linfadenectomía terapéutica en caso de presencia de metástasis regionales y ausencia de afectación sistémica<sup>6, 18, 26, 157</sup>. En estudios de cohortes

retrospectivas (n=1134), se han descrito supervivencias tras la cirugía a los 5, 10 y 15 años del 46%, 41% y 38%, con cierta variabilidad dependiendo de la combinación de diversos factores pronósticos<sup>174</sup>. Otros estudios similares de cohortes retrospectivas sin grupo de comparación han descrito supervivencias similares<sup>175, 176</sup>. No existen trabajos que hayan comparado la cirugía de las metástasis regionales frente a la observación. La linfadenectomía completa lleva aparejada un aumento de la comorbilidad con un porcentaje de complicaciones entre el 40-60%, como alteraciones de la sensibilidad o dolor<sup>177</sup>. Otros fueron, linforrea, seroma, infección, dehiscencias, necrosis, hematomas y linfedemas<sup>178</sup>.

Con respecto a las metástasis sistémicas, en un estudio de cohorte retrospectiva sin grupo control (n=1720) la resección completa de las metástasis pulmonares se ha asociado a unas tasas de supervivencia de hasta el 20% en cinco años<sup>179</sup>. De forma similar, en otro estudio observacional retrospectivo sin grupo control (n=50) existe un beneficio en la supervivencia global para aquellos pacientes a los que se les realiza una resección completa de sus metástasis viscerales en comparación con los pacientes con resección parcial<sup>180</sup>. En una serie de casos de 23 pacientes, la resección completa de las metástasis viscerales parece superior al tratamiento sistémico quimioterápico<sup>181</sup>.

En otro estudio observacional retrospectivo sin grupo control sobre 702 pacientes con metástasis cerebrales parece que la resección quirúrgica en pacientes con metástasis única sin afectación extracraneal y buen estado funcional es superior a otras terapias como la radiación total del cerebro<sup>182</sup> aunque con más posibilidades de efectos adversos.

## BLOQUE 8. Tratamiento médico de la enfermedad metastásica.

**Pregunta 21. En melanomas en estadios III y IV no quirúrgicos, los tratamientos con fármacos IPI (anti-CTLA4, anti-PD1) y las terapias dirigidas anti-BRAF, ¿mejoran la supervivencia global?**

**Resumen de la evidencia**

El tratamiento con fármacos IPI, tanto anti-CTLA4 (ipilimumab), anti-PD-1 (nivolumab, pembrolizumab), o combinaciones de ambos (nivolumab/ipilimumab), ha demostrado una mejoría en la SG de los pacientes con melanoma avanzado (estadio III no resecable o estadio IV) con independencia de si BRAF está o no mutado:

- Ipilimumab (3mg/kg cada 3 semanas, 4 ciclos) frente a la vacuna peptídica gp100, mediana de SG 10,1 vs 6,4 meses (HR: 0,66,  $p = 0,003$ ); ipilimumab (10 mg/kg) y dacarbazina (850 mg/m<sup>2</sup>) en las semanas 1,4,7 y 10, seguido solo por dacarbazina cada 3 semanas hasta la semana 22, frente a dacarbazina (850 mg/m<sup>2</sup>) en las mismas semanas, mediana de SG 11,2 vs 9,1 meses, HR: 0,72,  $p < 0,001$ <sup>183-185</sup>.

- Nivolumab (3 mg/kg cada 2 semanas) frente a dacarbazina (1000 mg/m<sup>2</sup> cada 3 semanas), mediana SG 37,5 vs 11,2 meses, HR: 0,46 (IC 95% 0,36-0,59),  $p < 0,001$ )<sup>186, 187</sup>.

- Pembrolizumab (10 mg/kg cada 3 semanas) frente a ipilimumab (3 mg/kg cada 3 semanas, 4 ciclos), mediana de SG no alcanzada vs 16 meses, HR:0,68 (IC 95% 0,53-0,86),  $p = 0,0008$ <sup>188, 189</sup>.

- Nivolumab/ipilimumab (nivolumab 1 mg/kg junto con ipilimumab 3 mg/kg cada 3 semanas, 4 dosis, seguido de nivolumab 3 mg/kg cada 2 semanas) frente a ipilimumab (3 mg/kg cada 3 semanas, 4 dosis), mediana de SG mayor de 60 meses y no alcanzada vs 19,9 meses, HR: 0,54 (IC 95% 0,44-0,67),  $p < 0,001$ )<sup>190-193</sup>.

- Nivolumab (nivolumab 3 mg/kg cada 2 semanas) frente a ipilimumab (3 mg/kg cada 3 semanas, 4 dosis), mediana de SG 36,9 meses vs 19,9 meses, HR:0,65 (IC 95% 0,53-0,79),  $p < 0,001$ )<sup>190-193</sup>.

Las diferentes combinaciones de tratamiento ensayadas con un inhibidor de BRAF y un inhibidor de MEK (dabrafenib/trametinib, vemurafenib/cobimetinib, encorafenib/binimetinib) han demostrado un aumento en la SG en pacientes con melanoma BRAF mutado en fase avanzada (estadio III no resecable o estadio IV):

- Dabrafenib/trametinib frente a dabrafenib, mediana de SG 25,1 vs 18,7 meses, HR: 0,71 (IC 95% 0,55-0,92);  $p = 0,0107$ <sup>194</sup>; dabrafenib/trametinib frente a vemurafenib, mediana de SG no alcanzada vs 17,2 meses, HR: 0,69 (IC 95% 0,53-0,89),  $p = 0,005$ <sup>195</sup>

- Vemurafenib/cobimetinib frente a vemurafenib, mediana de SG 22,3 vs 17,4 meses, HR:0,70 (IC 95% 0,55-0,90),  $p = 0,005$ <sup>196</sup>

- Encorafenib/binimetinib frente a vemurafenib, mediana de SG 33,6 vs 16,9 meses, HR:0,61 (IC 95% 0,47-0,79),  $p < 0,0001$ <sup>197, 198</sup>.

Nivel de evidencia: 1b.

## Recomendaciones

En paciente con melanoma sin mutación BRAF, en fase avanzada (estadio III no resecable o estadio IV), recomendamos el tratamiento con uno de los fármacos anti-PD-1, nivolumab o pembrolizumab, o con la combinación nivolumab/ipilimumab <sup>6, 26, 158</sup>.

En pacientes con melanoma avanzado, con BRAF mutado, recomendamos el tratamiento con una de las combinaciones disponibles de inhibidor de BRAF y MEK: dabrafenib/trametinib, vemurafenib/cobimetinib o encorafenib/binimetinib, o con uno de los fármacos anti-PD-1,

nivolumab o pembrolizumab, o con la combinación nivolumab/ipilimumab. Los criterios para elegir una u otra clase de fármacos, anti-BRAF o IPI, no se han establecido, pero en general se prefiere iniciar con un fármaco anti-BRAF en aquellos pacientes con elevada carga tumoral en los que se necesita una respuesta rápida, dado el mayor tiempo que precisan los IPI para ejercer su efecto <sup>6, 26, 158</sup>.

Fuerza de la recomendación: A

### **Calidad de la evidencia**

El escenario del tratamiento del melanoma avanzado, ya sean pacientes en estadio III no operables o en los que no se consideren factibles otras terapias, o pacientes en estadio IV, es decir con metástasis a distancia, ha cambiado radicalmente en los últimos años. Ello se debe a la introducción de fármacos dirigidos frente a 2 dianas: 1) los dirigidos frente a los puntos de control inmunitario de los linfocitos T, PD-1 y CTLA4, que actúan estimulando la respuesta inmune mediada por linfocitos T; y 2) aquellos dirigidos frente a la vía de señalización celular de las MAPK en las células de melanoma, útiles para aquellos melanomas con la mutación V600 en la quinasa BRAF, incluida en esta vía de señalización. Antes de la introducción de estos fármacos, la supervivencia a 1 año de los pacientes con melanoma avanzado era del 25-35%, sin que hubiese mejorado en las últimas décadas <sup>165</sup>. En la actualidad, en un porcentaje importante de pacientes se ha conseguido un control de la enfermedad a largo plazo, con supervivencias a los 3 años >60%, con los tratamientos combinados frente a los puntos de control inmunitario <sup>193</sup>.

### **Inmunoterapia:**

Los tratamientos con inmunoterapia se basan en la estimulación de la respuesta inmune celular a través del bloqueo de las señales reguladores mediadas por los receptores CTLA4 y PD-1. En la actualidad, los fármacos anti-PD-1 (nivolumab, pembrolizumab) de forma aislada o bien mediante la combinación de nivolumab y un fármaco anti-CTLA4 (ipilimumab) se consideran el tratamiento de elección para los pacientes con melanoma metastásico sin mutación BRAF, existiendo controversia sobre cuando utilizarlos en primera línea en el caso de

melanomas con la mutación V600 BRAF.

La respuesta a los tratamientos que estimulan la respuesta inmune por estos mecanismos sigue también una cinética particular, en la que el inicio de la respuesta aparece alrededor de los 3 meses y la mediana de tiempo hasta la respuesta completa, en los casos en los que se consigue, ocurre alrededor de los 12 meses <sup>199</sup>. Junto a ello existe un grupo de pacientes respondedores tardíos en los que la mejoría se produce más allá de los primeros 12 meses tras iniciar el tratamiento o en los que una respuesta parcial acaba convirtiéndose en completa con el paso de los meses <sup>188, 199, 200</sup>. Otra característica diferenciadora de la respuesta a estos fármacos es la presencia en algunos casos de un aumento paradójico de las metástasis en las primeras semanas de tratamiento (pseudoprogresión) <sup>201</sup>. Estos aspectos son cruciales a la hora de evaluar el efecto de estos fármacos y han conducido a la elaboración de unos criterios de evaluación de respuesta particulares para ellos <sup>202</sup>.

### **Ipilimumab**

Ipilimumab es un anticuerpo monoclonal frente al receptor regulador de la respuesta inmune CTLA4. Existen dos ensayos aleatorizados que han demostrado la mejoría de la SG de pacientes con melanoma tratados con la dosis habitual de ipilimumab (3 mg/kg cada 3 semanas) <sup>183-185</sup>. En uno de estos ensayos se comparó ipilimumab con la vacuna gp100 (HR 0,66, mediana de SG 10,1 vs 6,4 meses,  $p=0,003$ ), y en el otro un grupo recibió ipilimumab y dacarbazina y el otro únicamente dacarbazina (HR = 0,72, mediana de SG 11,2 vs 9,1 meses,  $p < 0,001$ ). Existe otro ensayo que comparó la eficacia de una dosis alta de ipilimumab (10 mg/kg cada 3 semanas) frente a la dosis habitual <sup>203</sup>. Aunque el grupo tratado con dosis altas tuvo una mejoría estadísticamente significativa en la SG (HR = 0,84, mediana de SG 15,7 vs 11,5 meses,  $p = 0,04$ ), el porcentaje de pacientes que desarrollaron un grado de toxicidad severa fue también mucho mayor (toxicidad grado 3 ó 4, 30% vs 15%). Un análisis de más de 1800 pacientes tratados con ipilimumab en diferentes ensayos ha mostrado una tasa de supervivencia de alrededor del 20% a los 3 años, y a partir de este momento parece estabilizarse <sup>204</sup>.

En la actualidad, y debido a su menor eficacia en los ensayos comparativos con fármacos anti-PD1 que comentaremos a continuación, ipilimumab no se recomienda como tratamiento de primera línea en pacientes con melanoma diseminado. En segunda línea, y siguiendo lo expresado en el párrafo previo, podría considerarse su administración en pacientes que han

fracaso con fármacos anti-PD1.

#### **Anticuerpos anti-PD-1, solos o en combinación con anti-CTLA4**

Tanto pembrolizumab como nivolumab fueron comparados en sendos ensayos (KEYNOTE-002 Y CheckMate 037, respectivamente) con la quimioterapia de elección del investigador, en pacientes en estadio III no resecable o estadio IV que habían fracasado tras tratamiento con ipilimumab o con un inhibidor de BRAF <sup>205, 206</sup>. Pembrolizumab consiguió en su ensayo una mayor tasa de respondedores (respuesta completa más respuesta parcial del 22% con la dosis 2 mg/kg/3 semanas vs 4% con quimioterapia) y una mejoría en la SLP (16% vs <1% a 2 años); sin embargo, el aumento en SG no llegó a alcanzar significación estadística <sup>205</sup>. En el ensayo de nivolumab, aunque la tasa de respondedores también fue mayor en los tratados con nivolumab (27% vs 10%), la SLP y la SG no alcanzaron significación estadística al compararlos con la quimioterapia <sup>206</sup>. La explicación para estos resultados se ha buscado en que más del 70% de pacientes en ambos ensayos habían progresado tras 2 ó más tratamientos. Posteriormente, en el ensayo CheckMate 066, que incluyó solo a pacientes no tratados previamente, aquellos que recibieron nivolumab tuvieron una mejoría en la SLP y en la SG comparados con los tratados con quimioterapia (mediana SLP en meses: 5,1 vs 2,2, HR: 0,42 (IC 95% 0,33-0,53)  $p < 0,001$ ; mediana SG en meses: 37,5 vs 11,2, HR: 0,46 (IC 95% 0,36-0,59),  $p < 0,001$ ) <sup>186, 187</sup>.

Pembrolizumab y nivolumab han demostrado una mayor SLP y SG al compararlos con ipilimumab en ensayos separados (KEYNOTE006, la SG a 2 años con pembrolizumab 10 mg/kg/3semanas: 55%, frente a ipilimumab 3 mg/kg/3 semanas, 4 dosis: 43%,  $p = 0,0008$ ; CheckMate 067, la mediana de SG con nivolumab fue de 36,9 meses vs 19,9 meses con ipilimumab,  $p < 0,0001$ ) <sup>188-191, 193</sup>. Los ensayos mencionados mostraron que la toxicidad de los dos fármacos anti-PD-1 era menor que la de ipilimumab al inicio del tratamiento (CcheckMate 067, efectos adversos grado 3-4 relacionados con el tratamiento: 16% nivolumab vs 27% ipilimumab) <sup>191</sup>. Sin embargo, dado que ipilimumab solo se administró durante las primeras 12 semanas (4 dosis, 1 cada 3 semanas) con el tiempo los pacientes que recibieron pembrolizumab o nivolumab siguieron desarrollando nuevos efectos adversos y estos disminuyeron en el grupo tratado con ipilimumab (KEYNOTE 066, efectos adversos grado 3-4 en 17% pembrolizumab vs 20% ipilimumab; CheckMate 067, efectos adversos grado 3-4 en 22% nivolumab vs 28% ipilimumab) <sup>189, 190</sup>.

Respecto a la eficacia del tratamiento conjunto con nivolumab e ipilimumab en el ensayo CheckMate 067 se compararon tres grupos de tratamiento: 1) nivolumab/ipilimumab hasta completar 4 dosis de ipilimumab, es decir las primeras 12 semanas, seguido de nivolumab; 2) nivolumab; 3) ipilimumab<sup>190, 191, 193</sup>. Tanto el tratamiento conjunto como nivolumab en monoterapia consiguieron una mayor tasa de respuesta y una mejor SLP y SG que ipilimumab en monoterapia (tasa de respuesta: 58%, 45% y 19%; mediana de la SLP: 11,5, 6,9 y 2,9 meses; y mediana de SG: no alcanzada, 36,9 y 19,9 meses, respectivamente para los 3 grupos mencionados, diferencias con significación estadística  $p < 0,0001$  en todos los casos en las comparaciones realizadas con el grupo ipilimumab en monoterapia). En pacientes de este ensayo con un mínimo de seguimiento de 60 meses, se ha confirmado que la mediana de supervivencia global no se había alcanzado en el grupo de tratamiento combinado, y la supervivencia global a los 5 años era del 52% en el grupo combinado, 44% con nivolumab y 26% con ipilimumab<sup>192</sup>.

Una de las conclusiones más relevantes de este ensayo derivó del análisis de subgrupos al considerar pacientes cuyos tumores expresaban diferentes niveles de PD-L1. En general, las tasas de respuesta global (parcial más completa) fueron superiores con el tratamiento combinado que con ipilimumab en monoterapia en todos los subgrupos establecidos según el nivel de expresión de PD-L1<sup>190, 191, 193</sup>. Además, la tasa de respuesta, la SLP y la SG con el tratamiento combinado y con nivolumab en monoterapia mejoran a medida que aumenta la proporción de células tumorales PD-L1 positivas. Sin embargo, mientras que con niveles elevados de PD-L1 no existen diferencias en la respuesta entre el tratamiento combinado y nivolumab, las diferencias en respuesta global entre el tratamiento con nivolumab/ipilimumab y nivolumab en monoterapia se acrecientan en los grupos con menor expresión de PD-L1 (<1%)<sup>193</sup>. Se ha sugerido que éste podría ser un grupo de pacientes candidatos al tratamiento combinado.

La elevada eficacia demostrada con el tratamiento conjunto con nivolumab/ipilimumab se acompañó de un elevado porcentaje de reacciones adversas graves, 59% con nivolumab/ipilimumab, 21% con nivolumab y 28% con ipilimumab en el CheckMate 067, las cuales motivaron el abandono del tratamiento en un 30%, 8% y 14% de los casos, respectivamente<sup>193</sup>. En los pacientes en tratamiento con nivolumab/ipilimumab que interrumpieron el tratamiento por efectos adversos se mantuvo la eficacia a largo plazo<sup>207</sup>.

### Tratamientos anti-BRAF

Entre el 40 y el 50% de los melanomas tienen una mutación en la quinasa BRAF, incluida en la vía de señalización de las MAP quinasas<sup>208</sup>. La gran mayoría de estas mutaciones ocurren en la posición V600, y la sustitución más frecuente es la V600E, y en segundo lugar V600K. Los primeros tratamientos diseñados para melanomas con esta mutación se basaban en la utilización de un fármaco que bloqueaba la quinasa mutada. La aparición de resistencias en la mayoría de los pacientes motivó la adición de un segundo bloqueo, sobre la quinasa MEK, que se encuentra en la misma vía de señalización, en el escalón siguiente a BRAF. Esto ha conducido a un aumento de la eficacia y a una disminución de algunas de las toxicidades asociadas a la monoterapia anti-BRAF

### Monoterapia anti-BRAF y anti-MEK

Tanto vemurafenib como dabrafenib, ambos fármacos inhibidores de BRAF mutado, han demostrado en ensayos en fase III aleatorizados frente a dacarbazina, un aumento en la tasa de respuesta global y en la SLP (vemurafenib: tasa de respuesta de 48% vs 5%,  $p < 0,001$ , mediana de SLP: 5,3 vs 1,6 meses, HR = 0,26,  $p < 0,001$ ; dabrafenib: tasa de respuesta de 50% vs 6%, mediana de SLP: 5,1 vs 2,7 meses, HR = 0,30,  $p < 0,0001$ )<sup>209, 210</sup>. Respecto a la SG, solo vemurafenib consiguió demostrar una mejoría (mediana de 13,6 vs 9,7 meses, HR = 0,81, 95% IC: 0,67–0,98,  $p < 0,001$ )<sup>211</sup>, aunque se ha argumentado que los peores resultados de dabrafenib no se debieron a una menor eficacia sino al diseño del ensayo que permitió un cambio de tratamiento a dabrafenib en los pacientes que no respondieron a dacarbazina.

Los tratamientos anti-BRAF muestran un rápido inicio en la respuesta, con una mediana de 1-1,5 meses tras el inicio<sup>209, 210</sup>. Sin embargo, la duración de las respuestas es corta, desapareciendo el efecto a partir de los 5 meses de tratamiento, momento a partir del cual se produce un descenso brusco de la supervivencia<sup>209, 210, 212</sup>.

En cuanto a la toxicidad del tratamiento, la monoterapia anti-BRAF ocasionó, además de otros efectos adversos que se comentarán más adelante, la aparición de neoplasias hiperproliferativas cutáneas (queratoacantomas y carcinomas espinocelulares) en un 18% de los casos con vemurafenib y en un 6% con dabrafenib<sup>209, 210</sup>.

### Tratamiento combinado anti-BRAF/MEK

Existen tres posibilidades de tratamiento combinado anti-BRAF/MEK: dabrafenib/trametinib, vemurafenib/cobimetinib, encorafenib/binimetinib. Los tres han demostrado aumento en la SLP y SG aunque existen más datos disponibles de las dos primeras combinaciones. La asociación dabrafenib/trametinib ha demostrado su efectividad tanto frente a dabrafenib (mediana de SLP 11,0 vs 8,8 meses, HR = 0,67,  $p = 0,0004$ , mediana de SG 25,1 vs 18,7 meses, HR = 0,71,  $p = 0,0107$  y tasa de respuesta de 69 % vs 53 %,  $p = 0,0014$  como frente a vemurafenib (mediana de SLP: 11,4 vs 7,3 meses, HR = 0,56,  $p < 0,001$ , mediana de SG no alcanzada vs 17,2 meses, HR = 0,69,  $p = 0,005$  y tasa de respuesta de 64% vs 51%,  $p < 0,001$ )<sup>194, 195</sup>. En un análisis conjunto a los 5 años de los pacientes tratados con dabrafenib y trametinib en los 2 ensayos previos, la mediana de supervivencia global fue de 25,9 meses (95% IC: 22,6–31,5) y la SG a los 5 años del 34% (95% IC: 30–38)<sup>213</sup>. Por su parte, vemurafenib/cobimetinib ha demostrado su superioridad frente a vemurafenib en monoterapia (mediana de SLP: 12,3 vs 7,2 meses, HR = 0,58,  $p < 0,0001$ ; mediana de SG: 22,3 vs 17,4 meses, HR = 0,70,  $p = 0,005$ )<sup>214</sup>.

El ensayo COLUMBUS, que evalúa la eficacia de encorafenib/binimetinib frente a encorafenib y frente a vemurafenib (tasa de respuesta de 64% vs 52% vs 41%, mediana de SLP de 14,9 vs 9,6 vs 7,3 meses y mediana de SG de 33,6 vs 23,5 vs 16,9 meses, respectivamente), demostró la superioridad de encorafenib/binimetinib frente a vemurafenib (SLP, HR = 0,54, 95% IC: 0,41–0,71,  $p < 0,0001$ ; SG, HR = 0,61, 95% IC: 0,47–0,79,  $p < 0,0001$ )<sup>197, 198</sup>. Sin embargo, al compararlo con encorafenib, aunque este no era el objetivo principal del estudio, la ventaja del tratamiento combinado tanto en SLP como en SG no alcanzó la significación estadística (SLP, HR = 0,75; 95% IC: 0,56–1,00,  $p = 0,051$  y SG, HR = 0,81, 95% IC: 0,61–1,06,  $p = 0,12$ ). En este ensayo el tratamiento con encorafenib mostró una ventaja frente a vemurafenib tanto en SLP (HR = 0,68, 95% IC: 0,52–0,90,  $p = 0,0070$ ) como en SG (HR = 0,76, 95% IC: 0,58–0,98,  $p = 0,033$ ).

Los tratamientos combinados ofrecen en todos los ensayos resultados inferiores al comparar la respuesta en pacientes que previamente han recibido monoterapia anti-BRAF frente a pacientes no tratados. Datos recientes apoyan que los pacientes en los que la recaída con monoterapia anti-BRAF se desarrolló de forma temprana (antes de 6 meses) tienen menores posibilidades de responder al tratamiento anti-BRAF/MEK que aquellos en los que la recaída

acaeció más tardíamente (tasa de respuesta: 0% vs. 26%, mediana de SLP: 1,8 vs 3,9 meses,  $p = 0,018$ )<sup>215</sup>.

En términos de eficacia las combinaciones dabrafenib/trametinib y vemurafenib/cobimetinib tienen unos resultados similares, aunque existen ciertas diferencias en el perfil de toxicidad. En los ensayos pivotaes, el porcentaje de efectos adversos grado 3/4 con dabrafenib/trametinib fue del 52% mientras que con vemurafenib/cobimetinib fue del 62%<sup>195, 214</sup>. Junto a efectos adversos comunes como fatiga, artralgia o diarrea, la combinación dabrafenib/trametinib se caracteriza por inducir un cuadro de pirexia que puede obligar a interrumpir el tratamiento, mientras que vemurafenib/cobimetinib ocasiona con mayor frecuencia fotosensibilidad y hepatotoxicidad. Como ya se ha mencionado, vemurafenib es el fármaco anti-BRAF más frecuentemente asociado a la aparición de queratoacantomas y carcinomas espinocelulares, sin embargo, su combinación con cobimetinib disminuyó significativamente este efecto adverso; en el ensayo coBRIM un 4% de los pacientes tratados con la combinación vemurafenib/cobimetinib desarrolló alguno de estos tumores frente a un 20% de los tratados con vemurafenib en monoterapia<sup>214</sup>.

## Discusión

La GPC adaptada a partir de otras guías recientes nos ofrece una ayuda para la toma de decisiones en el ámbito dermato-oncológico.

Las ventajas principales de este estudio es el haber utilizado un método reproducible y estricto, el aplicar los hallazgos a nuestro entorno y el haber sido revisada antes de su publicación por revisores multidisciplinares.

Podría considerarse una limitación el que los panelistas de la guía sean todos dermatólogos. Lo hemos hecho así porque el documento de objetivos limitaba la GPC al uso dermatológico, las GPC originales son multidisciplinares y los borradores de la GPC se han sometido a revisión externa multidisciplinar.

El mantenimiento de la vigencia de las recomendaciones exige una revisión del contenido en los próximos tres años.

Como en cualquier guía, estas recomendaciones no son de obligado cumplimiento, sino que deben aplicarse de forma flexible, atendiendo a la disponibilidad local de recursos, la experiencia del médico y las preferencias del paciente.

### Financiación:

El libro blanco del cáncer de la AEDV ha sido financiado íntegramente por la Fundación Piel Sana AEDV. En su elaboración no han participado empresas externas ni la industria farmacéutica (salvo que se les ha ofrecido la posibilidad de hacer una revisión externa, enviando sus comentarios como otras partes interesadas).

### Agradecimientos:

La presente guía forma parte del Libro Blanco del Cáncer Cutáneo de la Fundación Piel Sana de la AEDV.

## Bibliografía

1. Tejera-Vaquerizo A, Descalzo-Gallego MA, Otero-Rivas MM, Posada-Garcia C, Rodriguez-Pazos L, Pastushenko I, et al. Skin Cancer Incidence and Mortality in Spain: A Systematic Review and Meta-Analysis. *Actas Dermosifiliogr*. 2016;107:318-28.
2. Buendia-Eisman A, Arias-Santiago S, Molina-Leyva A, Gilaberte Y, Fernandez-Crehuet P, Husein-ElAhmed H, et al. Outpatient Dermatological Diagnoses in Spain: Results From the National DIADERM Random Sampling Project. *Actas Dermosifiliogr*. 2018;109:416-23.
3. Fervers B, Burgers JS, Voellinger R, Brouwers M, Browman GP, Graham ID, et al. Guideline adaptation: an approach to enhance efficiency in guideline development and improve utilisation. *BMJ Qual Saf*. 2011;20:228-36.
4. Brouwers MC, Kho ME, Browman GP, Burgers JS, Cluzeau F, Feder G, et al. AGREE II: advancing guideline development, reporting and evaluation in health care. *J Clin Epidemiol*. 2010;63:1308-11.
5. Oxford Centre for Evidence-based Medicine. Oxford Centre for Evidence-based Medicine – Levels of Evidence (March 2009), 2009.
6. Coit DG, Thompson JA, Albertini MR, Barker C, Carson WE, Contreras C, et al. Cutaneous Melanoma, Version 2.2019, NCCN Clinical Practice Guidelines in Oncology. *J Natl Compr Canc Netw*. 2019;17:367-402.
7. Swetter SM, Tsao H, Bichakjian CK, Curiel-Lewandrowski C, Elder DE, Gershenwald JE, et al. Guidelines of care for the management of primary cutaneous melanoma. *J Am Acad Dermatol*. 2019;80:208-50.
8. Bastian BC, LeBoit PE, Hamm H, Brocker EB, Pinkel D. Chromosomal gains and losses in primary cutaneous melanomas detected by comparative genomic hybridization. *Cancer Res*. 1998;58:2170-5.
9. Shain AH, Yeh I, Kovalyshyn I, Sriharan A, Talevich E, Gagnon A, et al. The Genetic Evolution of Melanoma from Precursor Lesions. *N Engl J Med*. 2015;373:1926-36.
10. Fang Y, Dusza S, Jhanwar S, Busam KJ. Fluorescence in situ hybridization (FISH) analysis of melanocytic nevi and melanomas: sensitivity, specificity, and lack of association with sentinel node status. *Int J Surg Pathol*. 2012;20:434-40.
11. Gerami P, Jewell SS, Morrison LE, Blondin B, Schulz J, Ruffalo T, et al. Fluorescence in situ hybridization (FISH) as an ancillary diagnostic tool in the diagnosis of melanoma. *Am J Surg Pathol*. 2009;33:1146-56.
12. Gerami P, Scolyer RA, Xu X, Elder DE, Abraham RM, Fullen D, et al. Risk assessment for atypical spitzoid melanocytic neoplasms using FISH to identify chromosomal copy number aberrations. *Am J Surg Pathol*. 2013;37:676-84.
13. Diaz A, Puig-Butille JA, Munoz C, Costa D, Diez A, Garcia-Herrera A, et al. TERT gene amplification is associated with poor outcome in acral lentiginous melanoma. *J Am Acad Dermatol*. 2014;71:839-41.
14. Griewank KG, Murali R, Puig-Butille JA, Schilling B, Livingstone E, Potrony M, et al. TERT promoter mutation status as an independent prognostic factor in cutaneous melanoma. *J Natl Cancer Inst*. 2014;106.
15. Law MH, Montgomery GW, Brown KM, Martin NG, Mann GJ, Hayward NK, et al. Meta-analysis combining new and existing data sets confirms that the TERT-CLPTM1L locus influences melanoma risk. *J Invest Dermatol*. 2012;132:485-7.

16. Diaz A, Puig-Butille JA, Valera A, Munoz C, Costa D, Garcia-Herrera A, et al. TERT and AURKA gene copy number gains enhance the detection of acral lentiginous melanomas by fluorescence in situ hybridization. *J Mol Diagn*. 2014;16:198-206.
17. Australian Cancer Network Melanoma Guidelines Revision Working Party. Clinical practice guidelines for the management of melanoma in Australia and New Zealand. Wellington: Cancer Council Australia and Australian Cancer Network, Sydney and New Zealand Guidelines Group, 2008.
18. Pflugfelder A, Kochs C, Blum A, Capellaro M, Czeschik C, Dettenborn T, et al. Malignant melanoma S3-guideline "diagnosis, therapy and follow-up of melanoma". *J Dtsch Dermatol Ges*. 2013;11 Suppl 6:1-116, 1-26.
19. Knackstedt RW, Knackstedt T, Gastman B. Gene expression profiling in melanoma: past results and future potential. *Future Oncol*. 2019;15:791-800.
20. Gerami P, Cook RW, Russell MC, Wilkinson J, Amaria RN, Gonzalez R, et al. Gene expression profiling for molecular staging of cutaneous melanoma in patients undergoing sentinel lymph node biopsy. *J Am Acad Dermatol*. 2015;72:780-5 e3.
21. Gerami P, Cook RW, Wilkinson J, Russell MC, Dhillon N, Amaria RN, et al. Development of a prognostic genetic signature to predict the metastatic risk associated with cutaneous melanoma. *Clin Cancer Res*. 2015;21:175-83.
22. Zager JS, Gastman BR, Leachman S, Gonzalez RC, Fleming MD, Ferris LK, et al. Performance of a prognostic 31-gene expression profile in an independent cohort of 523 cutaneous melanoma patients. *BMC Cancer*. 2018;18:130.
23. Hsueh EC, DeBloom JR, Lee J, Sussman JJ, Covington KR, Middlebrook B, et al. Interim analysis of survival in a prospective, multi-center registry cohort of cutaneous melanoma tested with a prognostic 31-gene expression profile test. *J Hematol Oncol*. 2017;10:152.
24. Gastman BR, Gerami P, Kurley SJ, Cook RW, Leachman S, Vetto JT. Identification of patients at risk of metastasis using a prognostic 31-gene expression profile in subpopulations of melanoma patients with favorable outcomes by standard criteria. *J Am Acad Dermatol*. 2019;80:149-57 e4.
25. Podlipnik S, Carrera C, Boada A, Richarz NA, Lopez-Estebarez JL, Pinedo-Moraleda F, et al. Early outcome of a 31-gene expression profile test in 86 AJCC stage IB-II melanoma patients. A prospective multicentre cohort study. *J Eur Acad Dermatol Venereol*. 2019;33:857-62.
26. Cancer Council Australia Melanoma Guidelines Working Party. Clinical practice guidelines for the diagnosis and management of melanoma. Sydney: Cancer Council Australia, 2019.
27. Cinotti E, Fiorani D, Labeille B, Gonzalez S, Debarbieux S, Agozzino M, et al. The integration of dermoscopy and reflectance confocal microscopy improves the diagnosis of lentigo maligna. *J Eur Acad Dermatol Venereol*. 2019;33:e372-e4.
28. Mataka E, Migaldi M, Cesinaro AM. Impact of Dermoscopy and Reflectance Confocal Microscopy on the Histopathologic Diagnosis of Lentigo Maligna/Lentigo Maligna Melanoma. *Am J Dermatopathol*. 2018;40:884-9.
29. Ng JC, Swain S, Dowling JP, Wolfe R, Simpson P, Kelly JW. The impact of partial biopsy on histopathologic diagnosis of cutaneous melanoma: experience of an Australian tertiary referral service. *Arch Dermatol*. 2010;146:234-9.
30. Egnatios GL, Dueck AC, Macdonald JB, Laman SD, Warschaw KE, DiCaudo DJ, et al. The impact of biopsy technique on upstaging, residual disease, and outcome in cutaneous melanoma. *Am J Surg*. 2011;202:771-7; discussion 7-8.

31. Gardner KH, Hill DE, Wright AC, Brewer JD, Arpey CJ, Otley CC, et al. Upstaging From Melanoma in Situ to Invasive Melanoma on the Head and Neck After Complete Surgical Resection. *Dermatol Surg.* 2015;41:1122-5.
32. Hieken TJ, Hernandez-Irizarry R, Boll JM, Jones Coleman JE. Accuracy of diagnostic biopsy for cutaneous melanoma: implications for surgical oncologists. *Int J Surg Oncol.* 2013;2013:196493.
33. Mills JK, White I, Diggs B, Fortino J, Vetto JT. Effect of biopsy type on outcomes in the treatment of primary cutaneous melanoma. *Am J Surg.* 2013;205:585-90; discussion 90.
34. Moore P, Hundley J, Hundley J, Levine EA, Williford P, Sanguenza O, et al. Does shave biopsy accurately predict the final breslow depth of primary cutaneous melanoma? *Am Surg.* 2009;75:369-73; discussion 74.
35. Saco M, Thigpen J. A retrospective comparison between preoperative and postoperative Breslow depth in primary cutaneous melanoma: how preoperative shave biopsies affect surgical management. *J Drugs Dermatol.* 2014;13:531-6.
36. Zager JS, Hochwald SN, Marzban SS, Francois R, Law KM, Davis AH, et al. Shave biopsy is a safe and accurate method for the initial evaluation of melanoma. *J Am Coll Surg.* 2011;212:454-60; discussion 60-2.
37. Austin JR, Byers RM, Brown WD, Wolf P. Influence of biopsy on the prognosis of cutaneous melanoma of the head and neck. *Head Neck.* 1996;18:107-17.
38. Bong JL, Herd RM, Hunter JA. Incisional biopsy and melanoma prognosis. *J Am Acad Dermatol.* 2002;46:690-4.
39. Martin RC, 2nd, Scoggins CR, Ross MI, Reintgen DS, Noyes RD, Edwards MJ, et al. Is incisional biopsy of melanoma harmful? *Am J Surg.* 2005;190:913-7.
40. Molenkamp BG, Sluijter BJ, Oosterhof B, Meijer S, van Leeuwen PA. Non-radical diagnostic biopsies do not negatively influence melanoma patient survival. *Ann Surg Oncol.* 2007;14:1424-30.
41. Namin AW, Zitsch RP, 3rd. Impact of Biopsy Modality on the Management of Cutaneous Melanoma of the Head and Neck. *Otolaryngol Head Neck Surg.* 2018;158:473-8.
42. Moscarella E, Pampena R, Palmiotti G, Bonamonte D, Brancaccio G, Piccolo V, et al. A meta-analysis on the influence of partial biopsy of primary melanoma on disease recurrence and patient survival. *J Eur Acad Dermatol Venereol.* 2020;34:279-84.
43. Lowe M, Hill N, Page A, Chen S, Delman KA. The impact of shave biopsy on the management of patients with thin melanomas. *Am Surg.* 2011;77:1050-3.
44. Tzellos T, Kyrgidis A, Mocellin S, Chan AW, Pilati P, Apalla Z. Interventions for melanoma in situ, including lentigo maligna. *Cochrane Database Syst Rev.* 2014;CD010308.
45. Akhtar S, Bhat W, Magdum A, Stanley PR. Surgical excision margins for melanoma in situ. *J Plast Reconstr Aesthet Surg.* 2014;67:320-3.
46. Duffy KL, Truong A, Bowen GM, Andtbacka RH, Hyngstrom J, Bowles T, et al. Adequacy of 5-mm surgical excision margins for non-lentiginous melanoma in situ. *J Am Acad Dermatol.* 2014;71:835-8.
47. Kunishige JH, Brodland DG, Zitelli JA. Surgical margins for melanoma in situ. *J Am Acad Dermatol.* 2012;66:438-44.
48. Kunishige JH, Doan L, Brodland DG, Zitelli JA. Comparison of surgical margins for lentigo maligna versus melanoma in situ. *J Am Acad Dermatol.* 2019;81:204-12.
49. Navarrete-Dechent C, Aleissa S, Ariyan C, Busam KJ, Nehal KS. Comment on "Comparison of surgical margins for lentigo maligna versus melanoma in situ". *J Am Acad Dermatol.* 2019;81:e115-e6.

50. Pellacani G, De Carvalho N, Ciardo S, Ferrari B, Cesinaro AM, Farnetani F, et al. The smart approach: feasibility of lentigo maligna superficial margin assessment with hand-held reflectance confocal microscopy technology. *J Eur Acad Dermatol Venereol*. 2018;32:1687-94.
51. Walling HW, Scupham RK, Bean AK, Ceilley RI. Staged excision versus Mohs micrographic surgery for lentigo maligna and lentigo maligna melanoma. *J Am Acad Dermatol*. 2007;57:659-64.
52. Hilari H, Llorca D, Traves V, Villanueva A, Serra-Guillen C, Requena C, et al. Conventional surgery compared with slow Mohs micrographic surgery in the treatment of lentigo maligna: a retrospective study of 62 cases. *Actas Dermosifiliogr*. 2012;103:614-23.
53. Hou JL, Reed KB, Knudson RM, Mirzoyev SA, Lohse CM, Frohm ML, et al. Five-year outcomes of wide excision and Mohs micrographic surgery for primary lentigo maligna in an academic practice cohort. *Dermatol Surg*. 2015;41:211-8.
54. Moyer JS, Rudy S, Boonstra PS, Kraft C, Chinn SB, Baker SR, et al. Efficacy of Staged Excision With Permanent Section Margin Control for Cutaneous Head and Neck Melanoma. *JAMA Dermatol*. 2017;153:282-8.
55. Felton S, Taylor RS, Srivastava D. Excision Margins for Melanoma In Situ on the Head and Neck. *Dermatol Surg*. 2016;42:327-34.
56. Prieto VG, Argenyi ZB, Barnhill RL, Duray PH, Elenitsas R, From L, et al. Are en face frozen sections accurate for diagnosing margin status in melanocytic lesions? *Am J Clin Pathol*. 2003;120:203-8.
57. Mu EW, Quatrano NA, Yagerman SE, Ratner D, Meehan SA. Evaluation of MITF, SOX10, MART-1, and R21 Immunostaining for the Diagnosis of Residual Melanoma In Situ on Chronically Sun-Damaged Skin. *Dermatol Surg*. 2018;44:933-8.
58. Johnson TM, Headington JT, Baker SR, Lowe L. Usefulness of the staged excision for lentigo maligna and lentigo maligna melanoma: the "square" procedure. *J Am Acad Dermatol*. 1997;37:758-64.
59. de Vries K, Greveling K, Prens LM, Munte K, Koljenovic S, van Doorn MB, et al. Recurrence rate of lentigo maligna after micrographically controlled staged surgical excision. *Br J Dermatol*. 2016;174:588-93.
60. Wilson JB, Walling HW, Scupham RK, Bean AK, Ceilley RI, Goetz KE. Staged Excision for Lentigo Maligna and Lentigo Maligna Melanoma: Analysis of Surgical Margins and Long-term Recurrence in 68 Cases from a Single Practice. *J Clin Aesthet Dermatol*. 2016;9:25-30.
61. Hazan C, Dusza SW, Delgado R, Busam KJ, Halpern AC, Nehal KS. Staged excision for lentigo maligna and lentigo maligna melanoma: A retrospective analysis of 117 cases. *J Am Acad Dermatol*. 2008;58:142-8.
62. Bub JL, Berg D, Slee A, Odland PB. Management of lentigo maligna and lentigo maligna melanoma with staged excision: a 5-year follow-up. *Arch Dermatol*. 2004;140:552-8.
63. Bosbous MW, Dzwierzynski WW, Neuburg M. Staged excision of lentigo maligna and lentigo maligna melanoma: a 10-year experience. *Plast Reconstr Surg*. 2009;124:1947-55.
64. Mahoney MH, Joseph M, Temple CL. The perimeter technique for lentigo maligna: an alternative to Mohs micrographic surgery. *J Surg Oncol*. 2005;91:120-5.
65. Abdelmalek M, Loosemore MP, Hurt MA, Hruza G. Geometric staged excision for the treatment of lentigo maligna and lentigo maligna melanoma: a long-term experience with literature review. *Arch Dermatol*. 2012;148:599-604.
66. Gaudy-Marqueste C, Perchenet AS, Tasei AM, Madjlessi N, Magalon G, Richard MA, et al. The "spaghetti technique": an alternative to Mohs surgery or staged surgery for

- problematic lentiginous melanoma (lentigo maligna and acral lentiginous melanoma). *J Am Acad Dermatol*. 2011;64:113-8.
67. Moller MG, Pappas-Politis E, Zager JS, Santiago LA, Yu D, Prakash A, et al. Surgical management of melanoma-in-situ using a staged marginal and central excision technique. *Ann Surg Oncol*. 2009;16:1526-36.
68. Lee MR, Ryman WJ. Treatment of lentigo maligna with total circumferential margin control using vertical and horizontal permanent sections: a retrospective study. *Australas J Dermatol*. 2008;49:196-201.
69. Nosrati A, Berliner JG, Goel S, McGuire J, Morhenn V, de Souza JR, et al. Outcomes of Melanoma In Situ Treated With Mohs Micrographic Surgery Compared With Wide Local Excision. *JAMA Dermatol*. 2017;153:436-41.
70. Albertini JG, Elston DM, Libow LF, Smith SB, Farley MF. Mohs micrographic surgery for melanoma: a case series, a comparative study of immunostains, an informative case report, and a unique mapping technique. *Dermatol Surg*. 2002;28:656-65.
71. Shumaker PR, Kelley B, Swann MH, Greenway HT, Jr. Modified Mohs micrographic surgery for periocular melanoma and melanoma in situ: long-term experience at Scripps Clinic. *Dermatol Surg*. 2009;35:1263-70.
72. Bricca GM, Brodland DG, Ren D, Zitelli JA. Cutaneous head and neck melanoma treated with Mohs micrographic surgery. *J Am Acad Dermatol*. 2005;52:92-100.
73. Etzkorn JR, Sobanko JF, Elenitsas R, Newman JG, Goldbach H, Shin TM, et al. Low recurrence rates for in situ and invasive melanomas using Mohs micrographic surgery with melanoma antigen recognized by T cells 1 (MART-1) immunostaining: tissue processing methodology to optimize pathologic staging and margin assessment. *J Am Acad Dermatol*. 2015;72:840-50.
74. Read T, Noonan C, David M, Wagels M, Foote M, Schaidler H, et al. A systematic review of non-surgical treatments for lentigo maligna. *J Eur Acad Dermatol Venereol*. 2016;30:748-53.
75. Marsden JR, Fox R, Boota NM, Cook M, Wheatley K, Billingham LJ, et al. Effect of topical imiquimod as primary treatment for lentigo maligna: the LIMIT-1 study. *Br J Dermatol*. 2017;176:1148-54.
76. Hyde MA, Hadley ML, Tristani-Firouzi P, Goldgar D, Bowen GM. A randomized trial of the off-label use of imiquimod, 5%, cream with vs without tazarotene, 0.1%, gel for the treatment of lentigo maligna, followed by conservative staged excisions. *Arch Dermatol*. 2012;148:592-6.
77. Powell AM, Robson AM, Russell-Jones R, Barlow RJ. Imiquimod and lentigo maligna: a search for prognostic features in a clinicopathological study with long-term follow-up. *Br J Dermatol*. 2009;160:994-8.
78. Mora AN, Karia PS, Nguyen BM. A quantitative systematic review of the efficacy of imiquimod monotherapy for lentigo maligna and an analysis of factors that affect tumor clearance. *J Am Acad Dermatol*. 2015;73:205-12.
79. Kirtschig G, van Meurs T, van Doorn R. Twelve-week treatment of lentigo maligna with imiquimod results in a high and sustained clearance rate. *Acta Derm Venereol*. 2015;95:83-5.
80. Tio D, van der Woude J, Prinsen CAC, Jansma EP, Hoekzema R, van Montfrans C. A systematic review on the role of imiquimod in lentigo maligna and lentigo maligna melanoma: need for standardization of treatment schedule and outcome measures. *J Eur Acad Dermatol Venereol*. 2017;31:616-24.
81. Swetter SM, Chen FW, Kim DD, Egbert BM. Imiquimod 5% cream as primary or adjuvant therapy for melanoma in situ, lentigo maligna type. *J Am Acad Dermatol*. 2015;72:1047-53.

82. Dancuart F, Harwood AR, Fitzpatrick PJ. The radiotherapy of lentigo maligna and lentigo maligna melanoma of the head and neck. *Cancer*. 1980;45:2279-83.
83. Harwood AR, Lawson VG. Radiation therapy for melanomas of the head and neck. *Head Neck Surg*. 1982;4:468-74.
84. Tsang RW, Liu FF, Wells W, Payne DG. Lentigo maligna of the head and neck. Results of treatment by radiotherapy. *Arch Dermatol*. 1994;130:1008-12.
85. Farshad A, Burg G, Panizzon R, Dummer R. A retrospective study of 150 patients with lentigo maligna and lentigo maligna melanoma and the efficacy of radiotherapy using Grenz or soft X-rays. *Br J Dermatol*. 2002;146:1042-6.
86. Hedblad MA, Mallbris L. Grenz ray treatment of lentigo maligna and early lentigo maligna melanoma. *J Am Acad Dermatol*. 2012;67:60-8.
87. Schmid-Wendtner MH, Brunner B, Konz B, Kaudewitz P, Wendtner CM, Peter RU, et al. Fractionated radiotherapy of lentigo maligna and lentigo maligna melanoma in 64 patients. *J Am Acad Dermatol*. 2000;43:477-82.
88. Fogarty GB, Hong A, Scolyer RA, Lin E, Haydu L, Guitera P, et al. Radiotherapy for lentigo maligna: a literature review and recommendations for treatment. *Br J Dermatol*. 2014;170:52-8.
89. Lee H, Sowerby LJ, Temple CL, Yu E, Moore CC. Carbon dioxide laser treatment for lentigo maligna: a retrospective review comparing 3 different treatment modalities. *Arch Facial Plast Surg*. 2011;13:398-403.
90. Tio D, Prinsen CAC, Dreno B, Hoekzema R, Augustin M, van Montfrans C. Variation in the diagnosis and clinical management of lentigo maligna across Europe: a survey study among European Association of Dermatologists and Venereologists members. *J Eur Acad Dermatol Venereol*. 2018;32:1476-84.
91. Hofmann U, Szedlak M, Rittgen W, Jung EG, Schadendorf D. Primary staging and follow-up in melanoma patients--monocenter evaluation of methods, costs and patient survival. *Br J Cancer*. 2002;87:151-7.
92. Xing Y, Bronstein Y, Ross MI, Askew RL, Lee JE, Gershenwald JE, et al. Contemporary diagnostic imaging modalities for the staging and surveillance of melanoma patients: a meta-analysis. *J Natl Cancer Inst*. 2011;103:129-42.
93. Bafounta ML, Beauchet A, Chagnon S, Saiag P. Ultrasonography or palpation for detection of melanoma nodal invasion: a meta-analysis. *Lancet Oncol*. 2004;5:673-80.
94. Voit C, Mayer T, Kron M, Schoengen A, Sterry W, Weber L, et al. Efficacy of ultrasound B-scan compared with physical examination in follow-up of melanoma patients. *Cancer*. 2001;91:2409-16.
95. Hafner J, Schmid MH, Kempf W, Burg G, Kunzi W, Meuli-Simmen C, et al. Baseline staging in cutaneous malignant melanoma. *Br J Dermatol*. 2004;150:677-86.
96. Olmedo D, Brotons-Segui M, Del Toro C, Gonzalez M, Requena C, Traves V, et al. Use of Lymph Node Ultrasound Prior to Sentinel Lymph Node Biopsy in 384 Patients with Melanoma: A Cost-Effectiveness Analysis. *Actas Dermosifiliogr*. 2017;108:931-8.
97. Orfaniotis G, Mennie JC, Fairbairn N, Butterworth M. Findings of computed tomography in stage IIB and IIC melanoma: a six-year retrospective study in the South-East of Scotland. *J Plast Reconstr Aesthet Surg*. 2012;65:1216-9.
98. Sawyer A, McGoldrick RB, Mackey SP, Allan R, Powell B. Does staging computerized tomography change management in thick malignant melanoma? *J Plast Reconstr Aesthet Surg*. 2009;62:453-6.
99. Wang TS, Johnson TM, Cascade PN, Redman BG, Sondak VK, Schwartz JL. Evaluation of staging chest radiographs and serum lactate dehydrogenase for localized melanoma. *J Am Acad Dermatol*. 2004;51:399-405.

100. Vermeeren L, van der Ent FW, Hulsewe KW. Is there an indication for routine chest X-ray in initial staging of melanoma? *J Surg Res.* 2011;166:114-9.
101. Terhune MH, Swanson N, Johnson TM. Use of chest radiography in the initial evaluation of patients with localized melanoma. *Archives of Dermatology.* 1998;134:569-72.
102. Tsao H, Feldman M, Fullerton JE, Sober AJ, Rosenthal D, Goggins W. Early detection of asymptomatic pulmonary melanoma metastases by routine chest radiographs is not associated with improved survival. *Arch Dermatol.* 2004;140:67-70.
103. Maubec E, Lumbroso J, Masson F, Suciu V, Kolb F, Mamelie G, et al. F-18 fluorodeoxy-D-glucose positron emission tomography scan in the initial evaluation of patients with a primary melanoma thicker than 4 mm. *Melanoma Res.* 2007;17:147-54.
104. Wagner JD, Schauwecker D, Davidson D, Logan T, Coleman JJ, 3rd, Hutchins G, et al. Inefficacy of F-18 fluorodeoxy-D-glucose-positron emission tomography scans for initial evaluation in early-stage cutaneous melanoma. *Cancer.* 2005;104:570-9.
105. Bikhchandani J, Wood J, Richards AT, Smith RB. No benefit in staging fluorodeoxyglucose-positron emission tomography in clinically node-negative head and neck cutaneous melanoma. *Head Neck.* 2014;36:1313-6.
106. Schroer-Gunther MA, Wolff RF, Westwood ME, Scheibler FJ, Schurmann C, Baumert BG, et al. F-18-fluoro-2-deoxyglucose positron emission tomography (PET) and PET/computed tomography imaging in primary staging of patients with malignant melanoma: a systematic review. *Syst Rev.* 2012;1:62.
107. Schlamann M, Loquai C, Goerick S, Forsting M, Wanke I. [Cerebral MRI in neurological asymptomatic patients with malignant melanoma]. *Rofo.* 2008;180:143-7.
108. Kaufmann PM, Crone-Münzebrock W. [Tumor follow-up using sonography and computed tomography in the abdominal region of patients with malignant melanoma]. *Aktuelle Radiologie.* 1992;2:81-5.
109. Henry L, Fabre C, Guiraud I, Bastide S, Fabbro-Peray P, Martinez J, et al. Clinical use of p-proteasome in discriminating metastatic melanoma patients: comparative study with LDH, MIA and S100B protein. *Int J Cancer.* 2013;133:142-8.
110. Sandru A, Panaitescu E, Voinea S, Bolovan M, Stanciu A, Cinca S, et al. Prognostic value of melanoma inhibitory activity protein in localized cutaneous malignant melanoma. *J Skin Cancer.* 2014;2014:843214.
111. Mocellin S, Zavagno G, Nitti D. The prognostic value of serum S100B in patients with cutaneous melanoma: a meta-analysis. *Int J Cancer.* 2008;123:2370-6.
112. Krähn G, Kaskel P, Sander S, Waizenhöfer PJ, Wortmann S, Leiter U, et al. S100 beta is a more reliable tumor marker in peripheral blood for patients with newly occurred melanoma metastases compared with MIA, albumin and lactate-dehydrogenase. *Anticancer Research.* 2001;21:1311-6.
113. Leiter U, Marghoob AA, Lasithiotakis K, Eigentler TK, Meier F, Meisner C, et al. Costs of the detection of metastases and follow-up examinations in cutaneous melanoma. *Melanoma Res.* 2009;19:50-7.
114. Mooney MM, Mettlin C, Michalek AM, Petrelli NJ, Kraybill WG. Life-long screening of patients with intermediate-thickness cutaneous melanoma for asymptomatic pulmonary recurrences: a cost-effectiveness analysis. *Cancer.* 1997;80:1052-64.
115. Francken AB, Bastiaannet E, Hoekstra HJ. Follow-up in patients with localised primary cutaneous melanoma. *Lancet Oncol.* 2005;6:608-21.
116. Basseres N, Grob JJ, Richard MA, Thirion X, Zarour H, Noe C, et al. Cost-effectiveness of surveillance of stage I melanoma. A retrospective appraisal based on a 10-year experience in a dermatology department in France. *Dermatology.* 1995;191:199-203.

117. Dicker TJ, Kavanagh GM, Herd RM, Ahmad T, McLaren KM, Chetty U, et al. A rational approach to melanoma follow-up in patients with primary cutaneous melanoma. Scottish Melanoma Group. *Br J Dermatol*. 1999;140:249-54.
118. Moore Dalal K, Zhou Q, Panageas KS, Brady MS, Jaques DP, Coit DG. Methods of detection of first recurrence in patients with stage I/II primary cutaneous melanoma after sentinel lymph node biopsy. *Ann Surg Oncol*. 2008;15:2206-14.
119. Poo-Hwu WJ, Ariyan S, Lamb L, Papac R, Zelterman D, Hu GL, et al. Follow-up recommendations for patients with American Joint Committee on Cancer Stages I-III malignant melanoma. *Cancer*. 1999;86:2252-8.
120. Meyers MO, Yeh JJ, Frank J, Long P, Deal AM, Amos KD, et al. Method of detection of initial recurrence of stage II/III cutaneous melanoma: analysis of the utility of follow-up staging. *Ann Surg Oncol*. 2009;16:941-7.
121. Garbe C, Paul A, Kohler-Spath H, Ellwanger U, Stroebe W, Schwarz M, et al. Prospective evaluation of a follow-up schedule in cutaneous melanoma patients: recommendations for an effective follow-up strategy. *J Clin Oncol*. 2003;21:520-9.
122. Romano E, Scordo M, Dusza SW, Coit DG, Chapman PB. Site and timing of first relapse in stage III melanoma patients: implications for follow-up guidelines. *J Clin Oncol*. 2010;28:3042-7.
123. Rinne D, Baum RP, Hor G, Kaufmann R. Primary staging and follow-up of high risk melanoma patients with whole-body 18F-fluorodeoxyglucose positron emission tomography: results of a prospective study of 100 patients. *Cancer*. 1998;82:1664-71.
124. Faries MB, Thompson JF, Cochran AJ, Andtbacka RH, Mozzillo N, Zager JS, et al. Completion Dissection or Observation for Sentinel-Node Metastasis in Melanoma. *N Engl J Med*. 2017;376:2211-22.
125. Leiter U, Stadler R, Mauch C, Hohenberger W, Brockmeyer N, Berking C, et al. Complete lymph node dissection versus no dissection in patients with sentinel lymph node biopsy positive melanoma (DeCOG-SLT): a multicentre, randomised, phase 3 trial. *Lancet Oncol*. 2016;17:757-67.
126. Baker JJ, Meyers MO, Frank J, Amos KD, Stitzenberg KB, Ollila DW. Routine restaging PET/CT and detection of initial recurrence in sentinel lymph node positive stage III melanoma. *Am J Surg*. 2014;207:549-54.
127. Rueth NM, Xing Y, Chiang YJ, Cromwell KD, Ross MI, Lee JE, et al. Is surveillance imaging effective for detecting surgically treatable recurrences in patients with melanoma? A comparative analysis of stage-specific surveillance strategies. *Ann Surg*. 2014;259:1215-22.
128. Lewin J, Sayers L, Kee D, Walpole I, Sanelli A, Te Marvelde L, et al. Surveillance imaging with FDG-PET/CT in the post-operative follow-up of stage 3 melanoma. *Ann Oncol*. 2018;29:1569-74.
129. Strobel K, Dummer R, Husarik DB, Perez Lago M, Hany TF, Steinert HC. High-risk melanoma: accuracy of FDG PET/CT with added CT morphologic information for detection of metastases. *Radiology*. 2007;244:566-74.
130. Danielsen M, Hojgaard L, Kjaer A, Fischer BM. Positron emission tomography in the follow-up of cutaneous malignant melanoma patients: a systematic review. *Am J Nucl Med Mol Imaging*. 2013;4:17-28.
131. Morton RL, Craig JC, Thompson JF. The role of surveillance chest X-rays in the follow-up of high-risk melanoma patients. *Ann Surg Oncol*. 2009;16:571-7.
132. Brown RE, Stromberg AJ, Hagendoorn LJ, Hulsewede DY, Ross MI, Noyes RD, et al. Surveillance after surgical treatment of melanoma: futility of routine chest radiography. *Surgery*. 2010;148:711-6; discussion 6-7.

133. Weiss M, Loprinzi CL, Creagan ET, Dalton RJ, Novotny P, O'Fallon JR. Utility of follow-up tests for detecting recurrent disease in patients with malignant melanomas. *JAMA*. 1995;274:1703-5.
134. Fields RC, Coit DG. Evidence-based follow-up for the patient with melanoma. *Surg Oncol Clin N Am*. 2011;20:181-200.
135. Podlipnik S, Carrera C, Sanchez M, Arguis P, Olondo ML, Vilana R, et al. Performance of diagnostic tests in an intensive follow-up protocol for patients with American Joint Committee on Cancer (AJCC) stage IIB, IIC, and III localized primary melanoma: A prospective cohort study. *J Am Acad Dermatol*. 2016;75:516-24.
136. Osella-Abate S, Ribero S, Sanlorenzo M, Maule MM, Richiardi L, Merletti F, et al. Risk factors related to late metastases in 1,372 melanoma patients disease free more than 10 years. *Int J Cancer*. 2015;136:2453-7.
137. Crowley NJ, Seigler HF. Late recurrence of malignant melanoma. Analysis of 168 patients. *Ann Surg*. 1990;212:173-7.
138. Salama AK, de Rosa N, Scheri RP, Pruitt SK, Herndon JE, 2nd, Marcello J, et al. Hazard-rate analysis and patterns of recurrence in early stage melanoma: moving towards a rationally designed surveillance strategy. *PLoS One*. 2013;8:e57665.
139. Slingluff CL, Jr., Vollmer RT, Seigler HF. Multiple primary melanoma: incidence and risk factors in 283 patients. *Surgery*. 1993;113:330-9.
140. Ferrone CR, Ben Porat L, Panageas KS, Berwick M, Halpern AC, Patel A, et al. Clinicopathological features of and risk factors for multiple primary melanomas. *JAMA*. 2005;294:1647-54.
141. Schmid-Wendtner MH, Baumert J, Wendtner CM, Plewig G, Volkenandt M. Risk of second primary malignancies in patients with cutaneous melanoma. *Br J Dermatol*. 2001;145:981-5.
142. Youlden DR, Youl PH, Soyer HP, Aitken JF, Baade PD. Distribution of subsequent primary invasive melanomas following a first primary invasive or in situ melanoma Queensland, Australia, 1982-2010. *JAMA Dermatol*. 2014;150:526-34.
143. Moore MM, Geller AC, Warton EM, Schwalbe J, Asgari MM. Multiple primary melanomas among 16,570 patients with melanoma diagnosed at Kaiser Permanente Northern California, 1996 to 2011. *J Am Acad Dermatol*. 2015;73:630-6.
144. Siskind V, Hughes MC, Palmer JM, Symmons JM, Aitken JF, Martin NG, et al. Nevi, family history, and fair skin increase the risk of second primary melanoma. *J Invest Dermatol*. 2011;131:461-7.
145. Murchie P, Nicolson MC, Hannaford PC, Raja EA, Lee AJ, Campbell NC. Patient satisfaction with GP-led melanoma follow-up: a randomised controlled trial. *Br J Cancer*. 2010;102:1447-55.
146. Murchie P, Hannaford PC, Wyke S, Nicolson MC, Campbell NC. Designing an integrated follow-up programme for people treated for cutaneous malignant melanoma: a practical application of the MRC framework for the design and evaluation of complex interventions to improve health. *Fam Pract*. 2007;24:283-92.
147. Wong SL, Faries MB, Kennedy EB, Agarwala SS, Akhurst TJ, Ariyan C, et al. Sentinel Lymph Node Biopsy and Management of Regional Lymph Nodes in Melanoma: American Society of Clinical Oncology and Society of Surgical Oncology Clinical Practice Guideline Update. *Ann Surg Oncol*. 2018;25:356-77.
148. Cordeiro E, Gervais MK, Shah PS, Look Hong NJ, Wright FC. Sentinel Lymph Node Biopsy in Thin Cutaneous Melanoma: A Systematic Review and Meta-Analysis. *Ann Surg Oncol*. 2016;23:4178-88.
149. van der Ploeg AP, van Akkooi AC, Haydu LE, Scolyer RA, Murali R, Verhoef C, et al. The prognostic significance of sentinel node tumour burden in melanoma patients: an

- international, multicenter study of 1539 sentinel node-positive melanoma patients. *Eur J Cancer*. 2014;50:111-20.
150. Gershenwald JE, Scolyer RA, Hess KR, Sondak VK, Long GV, Ross MI, et al. Melanoma staging: Evidence-based changes in the American Joint Committee on Cancer eighth edition cancer staging manual. *CA Cancer J Clin*. 2017;67:472-92.
151. van Akkooi AC, Nowecki ZI, Voit C, Schafer-Hesterberg G, Michej W, de Wilt JH, et al. Sentinel node tumor burden according to the Rotterdam criteria is the most important prognostic factor for survival in melanoma patients: a multicenter study in 388 patients with positive sentinel nodes. *Ann Surg*. 2008;248:949-55.
152. Cadili A, Scolyer RA, Brown PT, Dabbs K, Thompson JF. Total sentinel lymph node tumor size predicts nonsentinel node metastasis and survival in patients with melanoma. *Ann Surg Oncol*. 2010;17:3015-20.
153. Kim C, Economou S, Amatruda TT, Martin JC, Dudek AZ. Prognostic significance of microscopic tumor burden in sentinel lymph node in patients with cutaneous melanoma. *Anticancer Res*. 2015;35:301-9.
154. Eggermont AMM, Blank CU, Mandala M, Long GV, Atkinson V, Dalle S, et al. Adjuvant Pembrolizumab versus Placebo in Resected Stage III Melanoma. *N Engl J Med*. 2018;378:1789-801.
155. Beasley GM, Hu Y, Youngwirth L, Scheri RP, Salama AK, Rossfeld K, et al. Sentinel Lymph Node Biopsy for Recurrent Melanoma: A Multicenter Study. *Ann Surg Oncol*. 2017;24:2728-33.
156. Mocellin S, Lens MB, Pasquali S, Pilati P, Chiarion Sileni V. Interferon alpha for the adjuvant treatment of cutaneous melanoma. *Cochrane Database Syst Rev*. 2013;CD008955.
157. Garbe C, Peris K, Hauschild A, Saiag P, Middleton M, Bastholt L, et al. Diagnosis and treatment of melanoma. European consensus-based interdisciplinary guideline - Update 2016. *Eur J Cancer*. 2016;63:201-17.
158. National Institute for Health and Care Excellence. Melanoma: assessment and management. NICE guideline [NG14], 2015.
159. Kirkwood JM, Strawderman MH, Ernstoff MS, Smith TJ, Borden EC, Blum RH. Interferon alfa-2b adjuvant therapy of high-risk resected cutaneous melanoma: the Eastern Cooperative Oncology Group Trial EST 1684. *J Clin Oncol*. 1996;14:7-17.
160. Kirkwood JM, Manola J, Ibrahim J, Sondak V, Ernstoff MS, Rao U, et al. A pooled analysis of eastern cooperative oncology group and intergroup trials of adjuvant high-dose interferon for melanoma. *Clin Cancer Res*. 2004;10:1670-7.
161. Eggermont AM, Suci S, Testori A, Kruit WH, Marsden J, Punt CJ, et al. Ulceration and stage are predictive of interferon efficacy in melanoma: results of the phase III adjuvant trials EORTC 18952 and EORTC 18991. *Eur J Cancer*. 2012;48:218-25.
162. Hauschild A, Gogas H, Tarhini A, Middleton MR, Testori A, Dreno B, et al. Practical guidelines for the management of interferon-alpha-2b side effects in patients receiving adjuvant treatment for melanoma: expert opinion. *Cancer*. 2008;112:982-94.
163. Eggermont AM, Chiarion-Sileni V, Grob JJ, Dummer R, Wolchok JD, Schmidt H, et al. Prolonged Survival in Stage III Melanoma with Ipilimumab Adjuvant Therapy. *N Engl J Med*. 2016;375:1845-55.
164. Weber J, Mandala M, Del Vecchio M, Gogas HJ, Arance AM, Cowey CL, et al. Adjuvant Nivolumab versus Ipilimumab in Resected Stage III or IV Melanoma. *N Engl J Med*. 2017;377:1824-35.
165. Balch CM, Gershenwald JE, Soong SJ, Thompson JF, Atkins MB, Byrd DR, et al. Final version of 2009 AJCC melanoma staging and classification. *J Clin Oncol*. 2009;27:6199-206.

166. Long GV, Hauschild A, Santinami M, Atkinson V, Mandala M, Chiarion-Sileni V, et al. Adjuvant Dabrafenib plus Trametinib in Stage III BRAF-Mutated Melanoma. *N Engl J Med*. 2017;377:1813-23.
167. Hauschild A, Dummer R, Schadendorf D, Santinami M, Atkinson V, Mandala M, et al. Longer Follow-Up Confirms Relapse-Free Survival Benefit With Adjuvant Dabrafenib Plus Trametinib in Patients With Resected BRAF V600-Mutant Stage III Melanoma. *J Clin Oncol*. 2018;JCO1801219.
168. Maio M, Lewis K, Demidov L, Mandala M, Bondarenko I, Ascierto PA, et al. Adjuvant vemurafenib in resected, BRAF(V600) mutation-positive melanoma (BRIM8): a randomised, double-blind, placebo-controlled, multicentre, phase 3 trial. *Lancet Oncol*. 2018;19:510-20.
169. Henderson MA, Burmeister BH, Ainslie J, Fisher R, Di Iulio J, Smithers BM, et al. Adjuvant lymph-node field radiotherapy versus observation only in patients with melanoma at high risk of further lymph-node field relapse after lymphadenectomy (ANZMTG 01.02/TROG 02.01): 6-year follow-up of a phase 3, randomised controlled trial. *Lancet Oncol*. 2015;16:1049-60.
170. Cornett WR, McCall LM, Petersen RP, Ross MI, Briele HA, Noyes RD, et al. Randomized multicenter trial of hyperthermic isolated limb perfusion with melphalan alone compared with melphalan plus tumor necrosis factor: American College of Surgeons Oncology Group Trial Z0020. *J Clin Oncol*. 2006;24:4196-201.
171. Andtbacka RH, Kaufman HL, Collichio F, Amatruda T, Senzer N, Chesney J, et al. Talimogene Laherparepvec Improves Durable Response Rate in Patients With Advanced Melanoma. *J Clin Oncol*. 2015;33:2780-8.
172. Gibson SC, Byrne DS, McKay AJ. Ten-year experience of carbon dioxide laser ablation as treatment for cutaneous recurrence of malignant melanoma. *Br J Surg*. 2004;91:893-5.
173. van Jarwaarde JA, Wessels R, Nieweg OE, Wouters MW, van der Hage JA. CO2 laser treatment for regional cutaneous malignant melanoma metastases. *Dermatol Surg*. 2015;41:78-82.
174. Morton DL, Wanek L, Nizze JA, Elashoff RM, Wong JH. Improved long-term survival after lymphadenectomy of melanoma metastatic to regional nodes. Analysis of prognostic factors in 1134 patients from the John Wayne Cancer Clinic. *Ann Surg*. 1991;214:491-9; discussion 9-501.
175. Khosrotehrani K, van der Ploeg AP, Siskind V, Hughes MC, Wright A, Thomas J, et al. Nomograms to predict recurrence and survival in stage IIIB and IIIC melanoma after therapeutic lymphadenectomy. *Eur J Cancer*. 2014;50:1301-9.
176. Spillane AJ, Pasquali S, Haydu LE, Thompson JF. Patterns of recurrence and survival after lymphadenectomy in melanoma patients: clarifying the effects of timing of surgery and lymph node tumor burden. *Ann Surg Oncol*. 2014;21:292-9.
177. Slagelse C, Petersen KL, Dahl JB, Finnerup K, Greene K, Leong SP, et al. Persistent postoperative pain and sensory changes following lymph node excision in melanoma patients: a topical review. *Melanoma Res*. 2014;24:93-8.
178. Soderman M, Thomsen JB, Sorensen JA. Complications following inguinal and ilioinguinal lymphadenectomies: a meta-analysis. *J Plast Surg Hand Surg*. 2016;50:315-20.
179. Petersen RP, Hanish SI, Haney JC, Miller CC, 3rd, Burfeind WR, Jr., Tyler DS, et al. Improved survival with pulmonary metastasectomy: an analysis of 1720 patients with pulmonary metastatic melanoma. *J Thorac Cardiovasc Surg*. 2007;133:104-10.
180. Berger AC, Buell JF, Venzon D, Baker AR, Libutti SK. Management of symptomatic malignant melanoma of the gastrointestinal tract. *Ann Surg Oncol*. 1999;6:155-60.

181. Chua TC, Saxena A, Morris DL. Surgical metastasectomy in AJCC stage IV M1c melanoma patients with gastrointestinal and liver metastases. *Ann Acad Med Singapore*. 2010;39:634-9.
182. Sampson JH, Carter JH, Jr., Friedman AH, Seigler HF. Demographics, prognosis, and therapy in 702 patients with brain metastases from malignant melanoma. *J Neurosurg*. 1998;88:11-20.
183. Hodi FS, O'Day SJ, McDermott DF, Weber RW, Sosman JA, Haanen JB, et al. Improved survival with ipilimumab in patients with metastatic melanoma. *N Engl J Med*. 2010;363:711-23.
184. Maio M, Grob JJ, Aamdal S, Bondarenko I, Robert C, Thomas L, et al. Five-year survival rates for treatment-naïve patients with advanced melanoma who received ipilimumab plus dacarbazine in a phase III trial. *J Clin Oncol*. 2015;33:1191-6.
185. Robert C, Thomas L, Bondarenko I, O'Day S, Weber J, Garbe C, et al. Ipilimumab plus dacarbazine for previously untreated metastatic melanoma. *N Engl J Med*. 2011;364:2517-26.
186. Ascierto PA, Long GV, Robert C, Brady B, Dutriaux C, Di Giacomo AM, et al. Survival Outcomes in Patients With Previously Untreated BRAF Wild-Type Advanced Melanoma Treated With Nivolumab Therapy: Three-Year Follow-up of a Randomized Phase 3 Trial. *JAMA Oncol*. 2019;5:187-94.
187. Robert C, Long GV, Brady B, Dutriaux C, Maio M, Mortier L, et al. Nivolumab in previously untreated melanoma without BRAF mutation. *N Engl J Med*. 2015;372:320-30.
188. Robert C, Schachter J, Long GV, Arance A, Grob JJ, Mortier L, et al. Pembrolizumab versus Ipilimumab in Advanced Melanoma. *N Engl J Med*. 2015;372:2521-32.
189. Schachter J, Ribas A, Long GV, Arance A, Grob JJ, Mortier L, et al. Pembrolizumab versus ipilimumab for advanced melanoma: final overall survival results of a multicentre, randomised, open-label phase 3 study (KEYNOTE-006). *Lancet*. 2017;390:1853-62.
190. Hodi FS, Chiarion-Sileni V, Gonzalez R, Grob JJ, Rutkowski P, Cowey CL, et al. Nivolumab plus ipilimumab or nivolumab alone versus ipilimumab alone in advanced melanoma (CheckMate 067): 4-year outcomes of a multicentre, randomised, phase 3 trial. *Lancet Oncol*. 2018;19:1480-92.
191. Larkin J, Chiarion-Sileni V, Gonzalez R, Grob JJ, Cowey CL, Lao CD, et al. Combined Nivolumab and Ipilimumab or Monotherapy in Untreated Melanoma. *N Engl J Med*. 2015;373:23-34.
192. Larkin J, Chiarion-Sileni V, Gonzalez R, Grob JJ, Rutkowski P, Lao CD, et al. Five-Year Survival with Combined Nivolumab and Ipilimumab in Advanced Melanoma. *N Engl J Med*. 2019;381:1535-46.
193. Wolchok JD, Chiarion-Sileni V, Gonzalez R, Rutkowski P, Grob JJ, Cowey CL, et al. Overall Survival with Combined Nivolumab and Ipilimumab in Advanced Melanoma. *N Engl J Med*. 2017;377:1345-56.
194. Long GV, Stroyakovskiy D, Gogas H, Levchenko E, de Braud F, Larkin J, et al. Dabrafenib and trametinib versus dabrafenib and placebo for Val600 BRAF-mutant melanoma: a multicentre, double-blind, phase 3 randomised controlled trial. *Lancet*. 2015;386:444-51.
195. Robert C, Karaszewska B, Schachter J, Rutkowski P, Mackiewicz A, Stroiakovski D, et al. Improved overall survival in melanoma with combined dabrafenib and trametinib. *N Engl J Med*. 2015;372:30-9.
196. Ascierto PA, McArthur GA, Dreno B, Atkinson V, Liskay G, Di Giacomo AM, et al. Cobimetinib combined with vemurafenib in advanced BRAF(V600)-mutant melanoma

- (coBRIM): updated efficacy results from a randomised, double-blind, phase 3 trial. *Lancet Oncol.* 2016;17:1248-60.
197. Dummer R, Ascierto PA, Gogas HJ, Arance A, Mandala M, Liskay G, et al. Overall survival in patients with BRAF-mutant melanoma receiving encorafenib plus binimetinib versus vemurafenib or encorafenib (COLUMBUS): a multicentre, open-label, randomised, phase 3 trial. *Lancet Oncol.* 2018;19:1315-27.
  198. Dummer R, Ascierto PA, Gogas HJ, Arance A, Mandala M, Liskay G, et al. Encorafenib plus binimetinib versus vemurafenib or encorafenib in patients with BRAF-mutant melanoma (COLUMBUS): a multicentre, open-label, randomised phase 3 trial. *Lancet Oncol.* 2018;19:603-15.
  199. Robert C, Ribas A, Hamid O, Daud A, Wolchok JD, Joshua AM, et al. Durable Complete Response After Discontinuation of Pembrolizumab in Patients With Metastatic Melanoma. *J Clin Oncol.* 2018;36:1668-74.
  200. Hamid O, Puzanov I, Dummer R, Schachter J, Daud A, Schadendorf D, et al. Final analysis of a randomised trial comparing pembrolizumab versus investigator-choice chemotherapy for ipilimumab-refractory advanced melanoma. *Eur J Cancer.* 2017;86:37-45.
  201. Hodi FS, Hwu WJ, Kefford R, Weber JS, Daud A, Hamid O, et al. Evaluation of Immune-Related Response Criteria and RECIST v1.1 in Patients With Advanced Melanoma Treated With Pembrolizumab. *J Clin Oncol.* 2016;34:1510-7.
  202. Wolchok JD, Hoos A, O'Day S, Weber JS, Hamid O, Lebbe C, et al. Guidelines for the evaluation of immune therapy activity in solid tumors: immune-related response criteria. *Clin Cancer Res.* 2009;15:7412-20.
  203. Ascierto PA, Del Vecchio M, Robert C, Mackiewicz A, Chiarion-Sileni V, Arance A, et al. Ipilimumab 10 mg/kg versus ipilimumab 3 mg/kg in patients with unresectable or metastatic melanoma: a randomised, double-blind, multicentre, phase 3 trial. *Lancet Oncol.* 2017;18:611-22.
  204. Schadendorf D, Hodi FS, Robert C, Weber JS, Margolin K, Hamid O, et al. Pooled Analysis of Long-Term Survival Data From Phase II and Phase III Trials of Ipilimumab in Unresectable or Metastatic Melanoma. *J Clin Oncol.* 2015;33:1889-94.
  205. Ribas A, Puzanov I, Dummer R, Schadendorf D, Hamid O, Robert C, et al. Pembrolizumab versus investigator-choice chemotherapy for ipilimumab-refractory melanoma (KEYNOTE-002): a randomised, controlled, phase 2 trial. *Lancet Oncol.* 2015;16:908-18.
  206. Larkin J, Minor D, D'Angelo S, Neyns B, Smylie M, Miller WH, Jr., et al. Overall Survival in Patients With Advanced Melanoma Who Received Nivolumab Versus Investigator's Choice Chemotherapy in CheckMate 037: A Randomized, Controlled, Open-Label Phase III Trial. *J Clin Oncol.* 2018;36:383-90.
  207. Schadendorf D, Wolchok JD, Hodi FS, Chiarion-Sileni V, Gonzalez R, Rutkowski P, et al. Efficacy and Safety Outcomes in Patients With Advanced Melanoma Who Discontinued Treatment With Nivolumab and Ipilimumab Because of Adverse Events: A Pooled Analysis of Randomized Phase II and III Trials. *J Clin Oncol.* 2017;35:3807-14.
  208. Long GV, Menzies AM, Nagrial AM, Haydu LE, Hamilton AL, Mann GJ, et al. Prognostic and clinicopathologic associations of oncogenic BRAF in metastatic melanoma. *J Clin Oncol.* 2011;29:1239-46.
  209. Chapman PB, Hauschild A, Robert C, Haanen JB, Ascierto P, Larkin J, et al. Improved survival with vemurafenib in melanoma with BRAF V600E mutation. *N Engl J Med.* 2011;364:2507-16.

210. Hauschild A, Grob JJ, Demidov LV, Jouary T, Gutzmer R, Millward M, et al. Dabrafenib in BRAF-mutated metastatic melanoma: a multicentre, open-label, phase 3 randomised controlled trial. *Lancet*. 2012;380:358-65.
211. Chapman PB, Robert C, Larkin J, Haanen JB, Ribas A, Hogg D, et al. Vemurafenib in patients with BRAFV600 mutation-positive metastatic melanoma: final overall survival results of the randomized BRIM-3 study. *Ann Oncol*. 2017;28:2581-7.
212. Sosman JA, Kim KB, Schuchter L, Gonzalez R, Pavlick AC, Weber JS, et al. Survival in BRAF V600-mutant advanced melanoma treated with vemurafenib. *N Engl J Med*. 2012;366:707-14.
213. Robert C, Grob JJ, Stroyakovskiy D, Karaszewska B, Hauschild A, Levchenko E, et al. Five-Year Outcomes with Dabrafenib plus Trametinib in Metastatic Melanoma. *N Engl J Med*. 2019;381:626-36.
214. Larkin J, Ascierto PA, Dreno B, Atkinson V, Liskay G, Maio M, et al. Combined vemurafenib and cobimetinib in BRAF-mutated melanoma. *N Engl J Med*. 2014;371:1867-76.
215. Johnson DB, Flaherty KT, Weber JS, Infante JR, Kim KB, Kefford RF, et al. Combined BRAF (Dabrafenib) and MEK inhibition (Trametinib) in patients with BRAFV600-mutant melanoma experiencing progression with single-agent BRAF inhibitor. *J Clin Oncol*. 2014;32:3697-704.
216. Sociedad Española de Calidad Asistencial (SECA) y el Grupo Español de Melanoma (GEM). Proceso de atención al paciente con melanoma cutáneo, 2012.
217. Bichakjian CK, Halpern AC, Johnson TM, Foote Hood A, Grichnik JM, Swetter SM, et al. Guidelines of care for the management of primary cutaneous melanoma. American Academy of Dermatology. *J Am Acad Dermatol*. 2011;65:1032-47.
218. Marsden JR, Newton-Bishop JA, Burrows L, Cook M, Corrie PG, Cox NH, et al. Revised U.K. guidelines for the management of cutaneous melanoma 2010. *Br J Dermatol*. 2010;163:238-56.

## MATERIAL SUPLEMENTARIO

# Apartado 1.- Resumen de los pasos para adaptar GPC

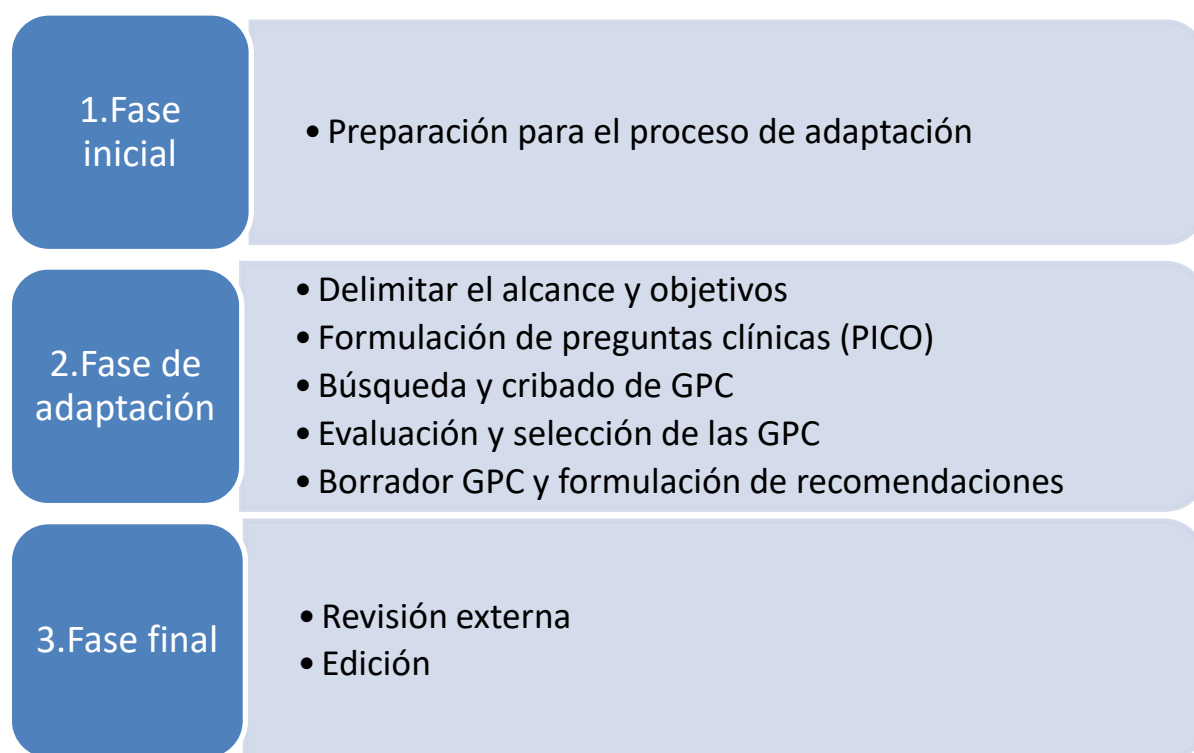

### 1. FASE INICIAL

#### 1.1. Preparación para el proceso de adaptación

Comprobar que la adaptación es factible para un tema específico y establecer un comité organizador con sus grupos de trabajo. Delimitar un calendario de reuniones y un plan de trabajo que profile el proceso de adaptación a seguir. El plan debe incluir un cronograma para completar el proceso y fecha de finalización.

### 2. FASE ADAPTACIÓN

#### 2.1. Delimitar el alcance y objetivos

En este apartado se explica la necesidad de definir desde el principio la perspectiva en que se sitúa la GPC, el ámbito sanitario de aplicación y el motivo que lleva a su realización, respondiendo a las preguntas: ¿Por qué se hace? ¿Para qué? ¿A qué profesionales se dirige la guía? y ¿A qué pacientes?

#### 2.2. Formulación de preguntas clínicas (PICO)

El objetivo de este apartado es elaborar el listado completo de preguntas clínicas que desarrollen el tema que aborde la guía. La respuesta a estas preguntas ayudará a los usuarios

de la guía de práctica clínica a tomar las diferentes decisiones que se plantean al intentar tratar el problema objeto de la guía.

### **2.3. Búsqueda y cribado de GPC**

La búsqueda de GPC se realiza a través de internet entrando en las direcciones de los organismos recopiladores (NGC o NeLH o Guíasalud, entre otros) o elaboradores de guías (NICE o SIGN o Academias Dermatológicas entre otros). La estrategia de búsqueda y cribado debería estar basada en las preguntas claves. Una forma de reducir el número de GPC para su adaptación final es utilizando el instrumento AGREE.

### **2.4. Evaluación y selección de las GPC**

Es necesario evaluar las GPC respecto a su calidad, vigencia, contenido, consistencia, aceptabilidad y la aplicabilidad de las recomendaciones. Después con los resultados del módulo de evaluación se tendrá una base para la toma de decisiones informada y transparente alrededor de la selección y modificación de las GPC fuente.

### **2.5. Borrador GPC y formulación de recomendaciones**

Los grupos continúan con su trabajo hasta la redacción de un borrador con las recomendaciones que respondan a las preguntas formuladas. Lo más adecuado es que todos los miembros del grupo revisen este conjunto de recomendaciones. Además hay que incluir en el borrador el detalle sobre el proceso seguido. La idea es tener un documento que respete las necesidades de los usuarios finales y ofrezca una explicación transparente y detallada del proceso.

## **3. FASE FINAL**

### **3.1. Revisión externa**

Se recomienda que la GPC sea revisada por la población objeto, incluyendo los sanitarios que utilizarían la GPC en la práctica y cualquier paciente afectado por la GPC, así como los responsables políticos, tomadores de decisiones, representantes de organizaciones y administradores. También se aconseja que sea revisada por organismos avalados o los desarrolladores de las GPC fuente.

### **3.2. Edición**

El producto final de GPC debe ser fácilmente accesible, debe ser claro y sin ambigüedades. Se recomienda incluir los algoritmos, las vías de atención, listas de control, y el material de información de los pacientes.

## Apartado 2.- Alcance y Objetivo de la Guía

### ALCANCE

#### 1. Título de la Guía:

Melanoma: diagnóstico y tratamiento en atención especializada dermatológica

#### 1.1. Título Abreviado: Melanoma

Melanoma cutáneo

#### 2. Antecedentes

- a) *La incidencia del melanoma ha aumentado en los últimos años y es el tumor cutáneo que genera más mortalidad.*
- b) *El melanoma puede diseminarse tanto a piel, ganglios linfáticos como a órganos viscerales, por lo que es el tumor cutáneo que causa mayor número de muertes.*
- c) *En los últimos años se han incorporado novedades en el diagnóstico, manejo y tratamiento del melanoma como son la dermatoscopia, la técnica de la linfadenectomía selectiva basada en la identificación del ganglio centinela y los nuevos tratamientos frente a dianas moleculares, por lo que han aumentado notablemente las posibles opciones para el diagnóstico y tratamiento y la dificultad de tomar decisiones adaptadas a la situación del paciente.*

#### 3. Necesidad clínica de una guía

- a) *En los últimos años varios países han publicado guías actualizadas sobre el diagnóstico y manejo del melanoma maligno: Estados, Reino Unido, Alemania, europea, Australia (1-6). Estas guías recogen las últimas evidencias científicas sobre estos aspectos del melanoma, pero algunas de sus conclusiones podrían no ser totalmente aplicables a nuestro entorno..*
- b) *Algunas comunidades españolas han publicado sus propias guías sobre el melanoma. La mayoría de estas guías no se encuentran actualizadas: Valencia. Murcia, catalanobalear*
- c) *Se pretende elaborar una guía con recomendaciones basadas en la última evidencia publicada sobre los métodos diagnósticos, las pruebas necesarias para la estadificación del paciente, el tratamiento y seguimiento del paciente con melanoma*
- d) *El objetivo de esta guía es ofrecer a los especialistas implicados en el melanoma unas pautas de actuación para el diagnóstico, manejo y tratamiento de este tumor basadas en los criterios de la medicina basada en la evidencia, las guías internacionales más recientemente publicadas, o en ausencia de los anteriores en el criterio de expertos. La AEDV considera necesario responder a la necesidad de generar una guía actualizada y uniforme para uso en todo el territorio nacional. Así mismo considera que la presente*

*guía puede servir como soporte para incorporar posteriormente y de forma periódica las modificaciones que se consideren relevantes en este ámbito. Para la valoración de la evidencia científica y la indicación del grado de recomendaciones se utilizarán valoraciones propuestas por agencias internacionales.*

- e) *Se precisa una guía clínica avalada por un organismo fiable, que a nivel del estado español recoja las últimas evidencias científicas y elabore unas recomendaciones sobre el diagnóstico y manejo del melanoma.*

#### 4. La guía

- a) El proceso de desarrollo de la guía se basará en el método ADAPTE, que se describe en un documento aparte.
- b) Este documento es el alcance, donde sus autores definen con precisión qué es lo que se abordará y lo que no se abordará en la guía. El alcance está basado en la solicitud de la AEDV.
- c) Las áreas tratadas por la guía se describen en las secciones siguientes.

##### 4.1. Población

###### 4.1.1. Grupos que se consideran

Pacientes con melanoma cutáneo.

###### 4.1.2. Grupos que no se toman en consideración

Melanoma ocular, mucoso, melanoma desmoplásico, melanoma infantil y otras formas peculiares de melanoma cutáneo.

###### 4.1.3. Aspectos clínicos que no están cubiertos

Las estrategias de prevención

##### 4.2. Ámbito asistencial

- a) La guía cubrirá la asistencia que los dermatólogos prestan a estos pacientes en España, independientemente del sistema sanitario en el que se produzca la asistencia (privada/pública).

##### 4.3. Proceso asistencial

La guía examinará el diagnóstico de los pacientes, estadiaje, tratamiento y su seguimiento posterior.

La guía revisará tanto las guías publicadas recientemente en otros países s, incluyendo cuestiones relativas a los métodos de diagnóstico disponibles habitualmente, a los tratamientos médicos y quirúrgicos y al seguimiento de estos pacientes.

##### 4.4. Soporte para auditoria en la guía

La guía incorporará criterios de revisión y consejos para auditoría.

#### 4.5. Estatus

##### 4.5.1. Alcance

Esta es la versión final del alcance.

##### 4.5.2. Guía

El desarrollo de las recomendaciones de la guía empezará en junio de 2016.

#### 5. Información adicional

Se pretende la publicación de las guías en la revista Actas Dermo-Sifiliográficas para su difusión.

## Apartado 3.- Estrategia de búsqueda y selección de las guías fuente.

**Términos de búsqueda:** (Unidos mediante OR)

Melanoma

Melanomas

Malignant Melanoma

Malignant Melanomas

Melanoma, Malignant

Melanomas, Malignant

Hutchinson's Melanotic Freckle

Freckle, Hutchinson's Melanotic

Hutchinson Melanotic Freckle

Hutchinsons Melanotic Freckle

Melanotic Freckle, Hutchinson's

Melanotic Freckle

Lentigo, Malignant

Lentigos, Malignant

Malignant Lentigo

Malignant Lentigos

Freckle, Melanotic

Freckles, Melanotic

Melanotic Freckles

Lentigo Maligna

Amelanotic Melanoma

Amelanotic Melanomas

## Melanomas, Amelanotic

Al basarnos en el método ADAPTE, buscamos guías, en octubre de 2016, en las páginas web o en fuentes u organizaciones específicas como aquellas que se dedican a recopilarlas, elaborarlas o difundirlas, además de las principales academias de dermatología o cáncer:

National Guidelines Clearinghouse (NGC), Guidelines International Network (G-I-N), Guíasalud, Epistemonikos, TRIP, Institute for Clinical Systems Improvement, NICE, New Zealand Guidelines Group, Scottish Guidelines Network, British Academy of Dermatology, American Academy of Dermatology, European Academy of Dermatology, National Comprehensive Cancer Network (NCCN)

También se han hecho búsquedas en Pubmed (Usando esos términos de búsqueda AND “Practice Guideline”[pt]) y Google.

Las guías fueron posteriormente revisadas y evaluadas por el grupo de expertos, siempre por parejas, usando la herramienta AGREE II. Las puntuaciones obtenidas se describen en la siguiente tabla.

| Guía                                                             | Alcance y Objetivo | Participación de los implicados | Rigor en la elaboración | Claridad de la presentación | Aplicabilidad | Independencia editorial | Puntuación global | Incluida |
|------------------------------------------------------------------|--------------------|---------------------------------|-------------------------|-----------------------------|---------------|-------------------------|-------------------|----------|
| <b>NICE (2015)<sup>158</sup></b>                                 | 42                 | 56                              | 93                      | 42                          | 53            | 28                      | 6,5               | Si       |
| <b>NCCN (Versión 1.2017)<sup>6</sup></b>                         | 56                 | 74                              | 118                     | 58                          | 47            | 41                      | 6,3               | Si       |
| <b>Alemana (S3-Guideline 2013)<sup>18</sup></b>                  | 60                 | 72                              | 119                     | 59                          | 50            | 29                      | 6,3               | Sí       |
| <b>Australia Cancer Council (2016)<sup>17, 26</sup></b>          | 18                 | 38                              | 81                      | 33                          | 33            | 22                      | 5,0               | Sí       |
| <b>SECA y GEM (Proceso Atención Melanoma 2012)<sup>216</sup></b> | 36                 | 29                              | 43                      | 29                          | 26            | 13                      | 5,0               | Sí       |

|                                                            |    |    |    |    |    |    |     |                                      |
|------------------------------------------------------------|----|----|----|----|----|----|-----|--------------------------------------|
| <b>AAD (Guidelines of care JAAD 2011)<sup>7, 217</sup></b> | 43 | 40 | 69 | 51 | 33 | 39 | 4,7 | Sí, se actualizó tras la evaluación. |
| <b>BAD (UK guidelines revised 2010)<sup>218</sup></b>      | 37 | 36 | 69 | 38 | 23 | 26 | 4,5 | No: demasiado antigua                |
| <b>Europea (EADO y EORTC update 2016)<sup>157</sup></b>    | 47 | 45 | 65 | 42 | 29 | 31 | 4,0 | Sí                                   |

Se excluyó la guía BAD por ser demasiado antigua. Durante el proceso de elaboración de la guía se actualizaron las búsquedas (la última en septiembre 2019), observándose que varias de las GPC aceptadas fueron actualizadas. Tras comprobar que se había utilizado una metodología similar o mejorada, se sustituyeron las guías antiguas por las actualizadas para extraer la información.

## Apartado 4.- Conflictos de interés

Se consideraron conflictos de interés, las relaciones económicas o personales de los autores que puedan sesgar o influir inadecuadamente sobre las recomendaciones de la GPC. Se deben declarar conflictos de interés si el autor:

1. Está recibiendo o ha recibido directa o indirectamente ingresos (en efectivo o especie) u otras ventajas (financiación de viajes, asistencia a congresos, material docente, ayuda para la realización de actividades lúdicas o de ocio, etc.) de la industria o entidades vinculadas a ella, relacionados de alguna manera con la GPC, para:
  - 1.1. Investigar.
  - 1.2. Organizar o dirigir actividad docente.
  - 1.3. Participar como docente en ese tipo de actividades.
  - 1.4. Realizar actividades de consultoría.
2. Posee intereses económicos relacionados con la industria (acciones, bonos, etc.), relacionados de alguna manera con la GPC.
3. Percibe o ha percibido ingresos, incentivos o cualquier otro tipo de ventajas (financiación de viajes, asistencia a o participación en congresos, material docente, ayuda para la realización de actividades lúdicas o de ocio, etc.) por respaldar, difundir o usar tecnologías o productos de la industria, relacionados de alguna manera con la GPC.

En caso de duda, siempre es mejor declarar cualquier conflicto.

### Usando esta declaración:

Aram Boada declara ser coorganizador y codirector del "Curso de manejo multidisciplinar sobre el diagnóstico y tratamiento del melanoma". Los siguientes laboratorios implicados en el tratamiento del melanoma son financiadores del curso: BristolMyers; MSD; Novartis y Roche. Ha recibido honorarios por ponencias: Bristol-Myers, Novartis y Roche y gastos para desplazamiento y asistencia a cursos de Roche Pharma y Mavig

María González Cao declara haber participado en charlas y *advisory boards* de Bristol-Myers Squibb, Roche Pharma y Pierre Fabre.

Eduardo Nagore declara haber recibido financiación para participación en congresos de Roche Pharma.

El resto de los participantes ha declarado la ausencia de conflictos de interés (actualizado a 10 de febrero de 2020). Los capítulos que incluyen información sobre fármacos han sido dirigidos y realizados principalmente por autores sin conflicto de interés.
